# Supplementary material for: Resting Heart Rate Is Not a Good Predictor of a Clustered Cardiovascular Risk Score in Adolescents: The HELENA Study
Source: PLoS One. 2015 May 26;10(5):e0127530. doi: 10.1371/journal.pone.0127530 (PMC4444318; doi:10.1371/journal.pone.0127530)
Supplement: S1 Dataset — (XLS) [file pone.0127530.s001.xls]

## Sheet: Sheet1
CRF_age	CRF_sex	CRF_height	CRF_weight	GQ_education_mother	CRF_waist	sedentary	to_be_included_blood	metabolic_risk	z_tg_boys	z_tc_HDL_boys	z_vo2_boys	z_homa_boys	z_4skin_boys	z_SBP_boys	z_tg_girls	z_tc_HDL_girls	z_vo2_girls	z_homa_girls	z_4skin_girls	z_SBP_girls
12833333	male	166.4	52.3	Higher s	65	higher >	1	healthy	.1107793	-.40972681	.38770624	-.14921746	-.08232384	.94199921
13.5	male	168	55.3	Higher s	68433333	medium 2	1		-.75669385	.42375068	.91772271		-.42449262	-.10752475
13166667	male	166.7	57.4	Higher e	72	medium 2	1	healthy	-.84813515	.58187074	.29185826	.41599972	.49157297	-.22458641
13.25	female	164.6	61.6	Higher s	74.6	medium 2	1	at risk							18517817	17973506	-.80866891	.71509996	18300356	-11901783
13333333	female	168.7	63.5	Higher e	74.5	low <2 h	1	healthy							.43908354	22018568	.58020159	.1388915	14388842	-.49124324
14.5	male	185.6	70.7	Higher s	78.5	higher >	1	healthy	-13662029	-.43065853	.09451757	10741797	-.26931986	-.36415928
13333333	male	180.9	64	Higher s	74	medium 2	1	healthy	-12718991	-13787697	-.09539524	.13549972	.08872693	.61065899
12.75	male	157.5	46	Lower se	65	higher >	1	healthy	-.35441861	-.7329087	-.49247751	-.22852541	-.46599569	-.11762266
12916667	female	152	66	Lower ed	79.7	higher >	1	at risk							.51600384	-.17846769	-.93816048	10566797	23229556	18795492
13166667	female	162.5	57.4	Higher s	70.5	higher >	1	healthy							-10692173	-13744429	-.45765323	-.19609807	12428199	.53512291
13.75	female	155.5	45.8	Higher s	64		1	healthy							-.37416087	-.72293982	-.53011355	.25717558	.14509966	.89168921
13166667	female	160.8	54.5	Higher e	67.2	higher >	1	healthy							-.95128288	-.90051829	.28892657	-.24360071	10904445	-.2469118
13333333	female	168.3	61.6	Higher s	69.5	medium 2	1	healthy							-10936556	.78176522	-.44975445	.45289073	.9764567	.29071534
13.5	female	162	58.7	Higher s	69.5	medium 2	1	healthy							-.617147	-.59426652	-.68065825	.26272508	.71817209	.51549062
12916667	female	161.1	61.9	Higher s	72.5	higher >	1								-.87036543	.82611909		.15425878	18844681	.00235227
13333333	male	169.2	64.5	Higher e	72.1	higher >	1	healthy	-.52620225	-.38569025	.06439629	.4086511	13746596	-19558535
13416667	female	158.9	49.2	Lower ed	67.5	medium 2	1	healthy							-.70800901	.06041773	.42363925	.64372093	.02539962	.28581869
13416667	female	167.3	50.5	Higher e	68.2	low <2 h	1	healthy							-.76695341	-.28281048	.40576982	-.11704222	14607316	.75497297
14416667	female	154.2	46.4	Lower se	68.1	higher >	1	healthy							-.85564712	-12606858	.4705276	-.52429549	.18270588	-.55453522
12916667	male	150.4	46.8	Lower se	69	higher >	1	healthy	-.17054302	14206899	-.53245808	-.40979358	.00096985	.38005888
13	male	145.4	47	Lower se	60.5	higher >	1	at risk	15104495	11300437	.18124124	.86725456	.7160306	.69640676
12833333	male	166	84.3	Higher e	94.2	medium 2	1	healthy	-.71864349	.86586095	10614903	.5377737	-10343636	14149451
13.25	male	161.9	44	Higher s	65	higher >	1	at risk	-.32804654	.37669404	-.69939471	21684879	33507596	-12591225
13	female	150.1	43.7	Higher e	62.6	medium 2	1	healthy							-.13053555	.25536957	.76004462	-.31565744	-.24994081	-.4718046
13.5	female	160.2	58.2	Lower se	69.5	low <2 h	1	healthy							-.44033362	-11289464	-.5579777	.1682804	.25043921	.04635588
13416667	male	168.5	83.4	Higher s	93	higher >	1	healthy	-.88999116	-.47240278	-.90292	.75328773	21319437	15347436
13416667	male	163.6	51.5	Higher s	72	higher >	1	at risk	20923706	.6482735	-.13995812	.64554127	38284994	-.08613277
12583333	male	157	51.1	Higher s	71	higher >	1	healthy	-.70445586	-.5073841	.4505891	.21069009	-.7092076	-.20997639
12583333	female	163.5	68.4	Higher e	88566667	higher >	1	healthy							-.17207126	-13181184	.3714733	.08948576	.95750372	26819586
12583333	female	154.5	47.8	Higher s	67133333	low <2 h	1								.2707117	-.0513525	-10216945		15592464	.33484716
12.75	female	164.5	84	Higher s	86	higher >	1								-.72789046	-.89541619		.56300614	.11610629	-10048183
12833333	male	146.3	46.3	Higher s	72.5	higher >	1		-.22098982	-.75208027		-.0919033	-.69434937	-14227303
12583333	male	152.1	45.7	Higher e	70	low <2 h	1				-.79275049		29835788	-.48028976
13166667	female	151.4	56.7	Lower ed	83.5	higher >	1								-.74489771	-.27253362		-.37089897	.5210415	10825472
12.5	female	152.9	48.9	Lower ed	65.4	low <2 h	1	healthy							15970071	12608887	.03843167	-.37162544	.33787291	-13033389
13.5	female	154.4	54.3	Lower se	74.5	medium 2	1	at risk							32727475	37520807	-11299453	10196782	24100287	.28092325
12583333	female	166	78.7	Higher e	83.5	medium 2	1	healthy							-11166749	-11898744	-.30507868	-.30927269	10430849	11172176
12583333	female	160.5	61	Higher s	75	low <2 h	1	at risk							.15263625	.51884892	-.88232217	.10707942	199785	.41308421
12583333	female	160.5	60	Higher s	76566667	low <2 h	1	at risk							.03456079	27561941	-.49925657	-.6333688	28670339	-21687383
12666667	male	159.6	58.9	Higher e	79	low <2 h	1		.70143647	2179187	-.24847094		21286553	.44436348
15083333	male	168.9	52.7	Higher e	71.3	higher >	1		25723672	15592888	-.7450607		19922597	.09372458
14.25	female	161	52.8	Lower se	69.5	low <2 h	1	healthy							-.27143358	-.18370456	.60560501	-.09488952	14295201	.62776091
13833333	female	160.2	43.6	Lower ed	62	medium 2	1	healthy							-.10663305	29045318	.27229002	-.21854352	-.76298756	-.12953852
13916667	female	155.9	53	Higher s	68	medium 2	1	healthy							-.66391595	.10139786	-10066015	14499462	-.10905712	.49099135
14333333	female	156.4	63.8	Higher s	74.3	higher >	1	healthy							28820322	.38977696	.01734677	.02308573	-.47915491	.31019568
14.5	female	155.2	43.3	Higher e	60.5	medium 2	1	healthy							-.17594879	-13365552	-.89554068	.37222635	13843004	.84759543
13833333	female	159.7	47.8	Higher s	62	medium 2	1	healthy							-.48958891	-.34522773	-.848849	.06903192	22648269	-.59860824
14083333	male	178.1	89.4	Higher e	88.4	higher >	1		-.12807621	.28970014		-.18002669	14579296	1025595
14333333	female	169.6	62.8	Lower ed	75.5	medium 2	1	healthy							.34938557	-1127759	.05098288	.42094489	-.91202807	.85737592
13916667	male	152.3	52.3	Higher s	75.3	medium 2	1	healthy	-.753061	-12377167	-.43080538	.45951898	.13054282	10009126
15166667	female	161.5	71.1	Lower se	78.5	higher >	1	at risk							.43210135	.34053997	-.18088058	17812327	27700681	14339276
14166667	female	159.7	58.1	Higher s	71.5	medium 2	1	healthy							.31520822	.08251851	.26228885	.2862574	10669402	.78899553
13916667	male	165	56.4	Higher s	68.5	higher >	1	healthy	-.72546484	-.596814	-.08679023	.09403473	15633642	-.55206955
14083333	male	166	58.7	Lower se	72.1	higher >	1	at risk	-.54195738	-.33527767	-11411999	.19720437	25933662	.41793871
13916667	female	159	65.8	Higher s	75	medium 2	1	healthy							-.25153098	.66777627	-.62229919	-.41544889	.8262524	-.60347441
14416667	female	173.1	60.2	Higher s	71.5	low <2 h	1	healthy							-.35501791	-1152721	12653669	.09642321	-.74983193	17123298
14833333	female	158.2	55.5	Higher e	70.5	low <2 h	1	healthy							-.81434505	.00490705	.70974523	.75823079	-.48933238	-.65710594
14833333	male	165.9	57.3	Higher e	72.7	higher >	1	at risk	.62811281	.89950548	-.87034432	19296194	20086669	-.3146879
14166667	female	151.2	61.7	Higher s	76	higher >	1	healthy							.90423462	-.26441737	-.15899877	.23325232	-.29317716	.94533745
14833333	male	165.9	59.1	Higher s	74.9	higher >	1	healthy	-11098216	-.58702339	-.72834809	-.18130623	12442299	-.24717692
16	female	163.1	58.2	Higher s	67	low <2 h	1	healthy							-.87047053	-14060199	13526736	-.17103385	-.83225207	-.56931483
16916667	male	171.1	51.8	Higher s	67.6	low <2 h	1	at risk	.00981618	-.10454182	-12439684	.96393724	2347663	-.7826675
14.75	male	174.9	52.5	Higher s	67.1	higher >	1	healthy	-107735	-.57543242	18925148	-.44853776	-.06492953	.04425577
14166667	female	162.4	53.1	Higher s	70	medium 2	1	healthy							-.77449061	-10069046	-11555888	-.27341117	.29469283	.63265362
14333333	female	173.5	82.4	Higher s	82	medium 2	1	healthy							.20213867	.32683767	-12340044	-.59241623	.04991229	12482189
14.25	female	169.8	59.4	Higher s	67	low <2 h	1	healthy							-.33033403	.1664432	127943	-.3871965	-.95398656	1565797
13166667	female	155.9	39.3	Lower ed	62	higher >	1	healthy							-.15522579	.40651531	1419586	-.26686328	-.94657466	-.2469118
12916667	female	156.5	52.7	Lower ed	51.5	low <2 h	1	healthy							.86997046	-.30337914	-.48794384	.18289967	.20538194	-.38873042
13833333	male	168	56.9	Higher s	70.4	low <2 h	1	at risk	-.14108522	-.41417942	-10998438	.86769537	32953209	.00949042
13.5	male	168.7	59.2	Higher e	75.9	medium 2	1	healthy	-.17686761	.4833702	-.32290754	-.71178494	.52712122	.23014239
13083333	male	162.8	61	Higher s	67.2	low <2 h	1	healthy	.51055567	.46997209	-.06055591	-.69368962	-.79566502	10802684
13666667	male	154.5	44.9	Higher s	67.2	higher >	1	healthy	-.54542782	.0626648	-.92319566	12614143	.33675125	.7950857
13.25	female	153.2	44.2	Higher e	67	higher >	1	healthy							-10961733	.25288607	-.9339479	-.00536746	.79553878	.45201238
13333333	male	145	38.9	Higher e	61566667	higher >	1	at risk	-.55382065	.53424135	-.51557492	.83278491	.64105485	52033656
14166667	male	167.8	79.4	Higher e	87.5	higher >	1	at risk	.28091599	-.33117962	-.44181606	.85402636	.17354189	.73411839
13166667	female	165.3	73.7	Higher e	81	medium 2	1	healthy							-10397337	-.54801095	.69973886	-.12256322	-.30766708	.45691944
13083333	female	152.3	47	Higher e	64	higher >	1	healthy							-11012383	-17659218	-.63911085	.90735384	-.23736749	-.08562497
13416667	female	160.2	50.4	Higher s	65	higher >	1	healthy							-.38381479	-.16625351	.61897203	-.32855531	-.90609608	-11998366
14.5	female	161.7	80.3	Lower se	92	medium 2	1	at risk							-.44098457	-.41907424	.11369931	.97997735	22580468	.45675978
13083333	male	154.5	68.4	Higher s	81166667	higher >	1	at risk	-.04207955	-.15223179	.15685904	27250379	10853896	-.3382996
13166667	male	159.2	55.7	Higher e	71.1	medium 2	1	healthy	-.59949168	.4530386	-.78045251	.49900913	16954922	-.83250917
14083333	male	169.1	56.3	Higher e	71	higher >	1	healthy	-.18326037	.46041167	-.4368031	.42475198	-.03144607	.55297344
14333333	male	173	81	Higher s	81.7	higher >	1	healthy	-.11508282	-.96221287	-.19516596	-.52128416	.35132506	.96136686
14166667	male	168.9	59.5	Higher s	71.1	higher >	1	at risk	-.46402536	-.80894885	-1162802	.31807735	35783606	.26150734
16166667	female	149.2	69.3	Lower ed	84	low <2 h	1								-.42358467	-.32809397		19337195	19568585	.12466858
14416667	male	156.7	47.9	Higher e	65066667	low <2 h	1	healthy	-10854941	-.70331626	11261202	-.44473268	-.35255351	-.54531145
14083333	male	164.3	54.2	Higher e	68633333	medium 2	1	healthy	-.90065439	-12425035	11452477	.21980081	-.75631332	1025595
14.5	female	159.1	55.8	Higher e	68.5	medium 2	1	at risk							-.26429405	.3552725	-.08714191	.20788136	11438198	-.48124579
14.75	female	169.8	54.8	Higher e	65	higher >	1								-.6989069	-13501886		-.49290964	-.61677889	.44211008
13916667	female	164.1	65.1	Lower ed	80	medium 2	1	healthy							-1105757	-11686462	-14866638	.03961117	28598825	.88187198
14.25	female	167.3	96.2	Higher s	89	low <2 h	1	healthy							-.77208744	-1121951	.79729862	-.55007615	-.49572267	10967789
15416667	male	167.3	65.2	Lower ed	71.5	higher >	1	healthy	-.78557153	-1125735	12478301	-.64050749	-.6194226	-.19438323
13916667	female	162.8	59	Higher s	67.5	low <2 h	1								.48487075	-.21686887	.1969511		-.33353141	.17828685
14333333	female	148.3	51.8	Higher s	63.5	low <2 h	1	healthy							-.4162983	.22253829	-.92739979	-.52855885	.20221952	-.94050202
14	male	172.8	46.6	Higher s	62	higher >	1	healthy	-11165962	-.42967049	-.45601465	-.42547435	16918647	-.23585007
14333333	male	177.2	68.6	Higher e	76.8	low <2 h	1	healthy	-.28061001	-.56127721	-.69823317	-.20519899	.88928151	.08369192
16166667	female	154.9	54.8	Lower se	67	medium 2	1	at risk							12869981	1020729	-12872526	.35691617	37211606	-.50093583
14083333	male	165	49.3	Higher s	67933333	medium 2	1	healthy	-14249039	-17213172	10585514	-.76479958	.62829638	-.79737389
13166667	male	161.3	48.4	Higher s	63.7	medium 2	1	healthy	-.43372937	-.22452306	-.58815472	.04490731	.40375769	-.15703944
13	male	159.6	48.2	Higher e	68	low <2 h	1	healthy	-.72812529	.15136447	-.31263997	-.59097888	.58287563	-.4520272
13333333	male	163.5	47.8	Higher e	68.2	low <2 h	1	healthy	.49567864	-.49444619	.27575579	-.18836333	-11462216	-.46997785
13333333	female	153.6	47.2	Higher e	63.8	medium 2	1	healthy							-.85784957	-.29781045	.04053539	-.18906843	-.71287372	15418491
13.5	female	163.1	63.7	Higher s	79.7	higher >	1	healthy							-11181183	-.59500748	-13349545	-.72345413	.45356891	.90643624
13166667	female	157.9	49.3	Higher e	61	low <2 h	1	healthy							-.27316017	10641825	.45032526	.00289637	-.45469602	.53512291
13	male	148.2	58	Higher e	83.6	higher >					.28304376		-11552217	-.38447226
13.75	male	182.5	67.7	Higher e	79466667	medium 2					.63191127		.02494285	-.03664126
12916667	male	157.4	40.3	Higher e	61166667	higher >					13306186		-10700039	-.90356631
16833333	male	170.7	63.1	Higher s	72	medium 2					-.86547593		.98328763	.92811084
13333333	male	153.2	48.2	Higher e	68.5	higher >							19383173	.54311919
13666667	female	161.7	45	Higher s	61	higher >											-.41396502		.88487423	.27113588
13	male	159.4	44.5	Higher s	60.5	medium 2					.16189763		21864015	-15329062
13.5	male	171.2	57.1	Higher s	69.5	medium 2					-.64276719		.07680396	-.37765846
13.5	male	180	72.3	Higher e	79.2	higher >							.36002236	-.98545931
13583333	female	159.1	56.7	Higher e	67	medium 2											-.55402967		-.32767151	.82333159
12916667	male	160.5	50.2	Higher e	66266667	higher >							-.34752161	.65029577
13583333	male	167.4	55.1	Higher s	64	higher >					-.66883081		.46308437	-.06138461
13	female	171.2	47.3	Higher s	64	higher >											-.94589758		13862695	-.55001656
13833333	male	167.1	58.2	Higher s	69.9	medium 2					.09222815		-.36896421	.48215184
13833333	female	168.3	66.1	Lower se	69.5	low <2 h											-.1478725		-.39152577	.96495749
14083333	male	175.2	76.9	Higher e	76	medium 2					.86513662		.03367872	14306992
14	male	171.6	90.5	Lower se	91.9	medium 2					-.91632018		.62435763	.91197405
14333333	female	165.4	77.4	Higher e	75	low <2 h											.00973535		-.71964	2029905
14.25	male	172.9	62.2	Lower se	71.5	medium 2					-.02955616		-.59547824	.64519972
14166667	female	168.7	59.7	Higher e	66	low <2 h											-.68169952		.33210274	-.22722691
14.75	male	167.5	57	Higher s	71.2	medium 2							-.48112246	-.69836415
15.5	male	171	64.2	Lower se	73.2	higher >					-.36435489		14175898	-.35081686
14583333	male	169.3	68.4	Higher e	74.5	low <2 h							.51040187	.76214718
14.75	female	166.6	62.6	Higher e	71	medium 2											-.90464102		27926805	.28577696
14583333	female	157.8	52	Higher s	62	medium 2													24950357	-13459593
14083333	female	164.1	57.7	Higher e	69	medium 2											-.30847074		13750696	.16851351
14166667	female	163.9	47.8	Higher e	61.4	medium 2											11750876		.17177456	-.93076552
14583333	female	170.8	47.6	Higher s	62	medium 2											-.63086493		11563668	-11114592
14.5	male	174.5	85	Lower ed	58.4	higher >					1533917		-.99129694	-11743014
14166667	male	176	61.6	Lower se	62	higher >					10217763		-10751276	-.95377824
13916667	male	166	61.7	Higher s	72.3	medium 2					-.24144844		.87527016	-.88967437
14583333	male	175.5	104.4	Higher s	91.9	higher >							12068922	13697491
14416667	male	159.3	51.1	Higher s	66.5	medium 2							.50250273	-18280499
14333333	male	177.5	63.8	Higher e	71	higher >					-.55685462		13621169	.15120538
13916667	male	175.4	54	Higher e	73.6	low <2 h					-10833285		-.37349318	.05561912
14583333	male	162.5	57.6	Lower ed	71	low <2 h					-10659099		-.4210832	10997038
14583333	male	162.3	58.1	Lower se	53	higher >					-.48690778		.90960976	-.04798878
13166667	female	157.4	59.1	Higher s	75	higher >											.96210465		-.54558664	-.01230139
13416667	male	165.4	41.8	Higher e	58966667	higher >					.10659439		-.35482736	.04894026
13083333	male	138.3	53.9	Higher e	83	higher >					11084025		-.42455334	-.06809618
13.25	male	166.8	83.3	Higher e	89	higher >					-.75827239		22970337	.63208955
12833333	female	156.9	52.4	Higher s	70	higher >											.54809572		-.00235934	-.46209006
13833333	male	170	52.6	Higher s	70.5	medium 2					1111541		-.06313516	-.93583241
13333333	female	161.4	52.2	Higher e	67966667	higher >											.85396063		.41780154	-.33485152
13	female	151.2	46.7	Higher s	66.5	higher >											.88976265		.69114749	-.62822853
13333333	male	158	77.5	Lower se	90	higher >					.53620267		.72036347	.27295998
13833333	male	169.3	61	Higher e	74.8	medium 2					-.28439441		15651214	.81976714
13.5	male	152.2	48.7	Higher e	69	higher >					.75491275		-11835179	12431438
13666667	female	159.4	51.9	Higher e	61	medium 2											-12990085		21008881	-.58888005
14083333	female	167.1	52.5	Higher e	62	medium 2											-.25647646		18667521	-10822459
12916667	male	157.5	46.6	Higher e	68	higher >					-.32543449		14176018	-.09285566
13.75	male	168	41.6	Higher e	57466667	higher >					-.09608061		-.40408188	-.91447086
13333333	female	163.8	52.5	Higher s	62	higher >											-.8464575		10807034	-16641811
13	male	170.2	53	Higher s	61933333	low <2 h					-.37172836		.31656568	1574621
13416667	female	166.1	55.2	Higher e	69	medium 2											-10208126		32341818	-.26152798
13916667	female	161.7	46.5	Higher e	63966667	higher >											-.76312888		.98391886	-.36894603
13.25	female	154	69.9	Higher e	74	medium 2											-.95482773		.16735593	-.01718495
13333333	female	161.1	44.5	Higher e	64.5	medium 2											-.8464575		-.14085361	-.72583081
14666667	male	153	37	Higher e	60.5						-.09333111		-.169393	-16221308
13833333	male	164.2	57.6		75033333						-.89449422		.64763421	.61719796
13583333	male	161.2	53.2	Higher s	68466667	higher >					.5007205		-.00987018	.74898184
13083333	male	153.6	49	Higher e	69	higher >					-.56252327		-12276843	10802684
14416667	female	161.5	53.7	Higher e	66	higher >											-.77425219		.67168702	-16488838
15333333	female	167.3	59.9	Higher s	69	higher >											1273499		-10420204	.01710384
13.25	male	164.8	51.5	Higher s	65	medium 2					-.51057946		11469994	-.2459732
13333333	male	148	58.7	Higher e	72.5	higher >					-.82244787		-.30781619	11509774
13166667	male	152	51.4		73033333						-.82347255		20297568	-.56232128
13083333	male	157.4	61.2	Higher e	82	medium 2					-.63890253		-.76450298	.40475982
13083333	female	160.3	58.6	Higher s	68.5	low <2 h											-.98680517		-11757295	-.24204018
14416667	female	159.8	47.7	Higher e	62.5	higher >											-.92033943		.41517232	-11017095
13666667	female	148	39.4	Higher s	61	medium 2											11145202		-11035089	.42750242
13666667	female	169.7	62.6	Lower se	68	higher >											-.0718619		.66305192	19129845
13416667	male	165.8	57.8	Higher e	67966667	low <2 h					.81278638		.76960101	-.55888838
13583333	female	165.9	47.7	Higher s	59	low <2 h											-.35122328		.6184483	-.34945969
13916667	male	160.7	54.9	Higher s	68.5	higher >					-11944213		.99136833	.79834972
13.75	male	167.5	60.9	Higher e	72	medium 2					-.83683817		-.51735573	-.71189479
13666667	male	165.4	57.8	Higher e	71	low <2 h					-.69489423		14440439	.86261354
13666667	male	167.3	64.3	Higher e	77						-.98900546		.77287164	.59250216
13166667	female	176.9	62.5	Higher s	66.5	medium 2											-.61469573		15475708	16299715
13.75	male	160.4	43.4	Lower se	63.5	higher >					-.81533617		11137878	-10495216
13583333	male	175.3	84.8	Higher s	82966667	higher >					.55624218		.18271012	.34379862
16666667	male	186.1	70.5		76						-.23344471		-.13830625	-10560981
12666667	male	157.5	42.7	Higher s	64	medium 2					-.698348		.96394214	-.23136914
12.75	female	156.6	58.4	Higher e	67.5	low <2 h											-.35867611		-.49624951	24371412
13916667	male	163.3	50.3	Higher s	64	low <2 h					-.20959987		-.8067376	-.95719533
12.5	male	159.9	50.4	Higher e	69	low <2 h					.87578343		-.92012409	-.2561646
12916667	male	150.8	35.5	Higher s	59	medium 2					.55625648		-.18885883	-15115993
12.5	male	163.9	65.4	Higher e	83						.92162976		-.59418121	.55483885
12583333	female	158.5	47.3	Higher s	69	higher >											.65560668		.39052837	-.68223444
12833333	female	158.3	47.2	Higher e	63	medium 2											.66721898		.67145582	-.7749754
13.5	male	165.7	55.6	Higher s	68						.11234719		.38551202	.5002761
14916667	female	160.9	51.8	Higher s	62	higher >											.4047366		-10726424	15266916
14.75	male	177.1	91.6	Higher e	85.5	medium 2					-.60072367		14016551	.71936479
14333333	female	172.1	54.3	Higher s	61	medium 2											.15912229		-.90935602	-.94050202
14833333	male	157.9	46.3	Lower ed	63	medium 2					13769146		-11878124	-.38219889
14416667	female	161.9	52.5	Higher e	62	medium 2											-.43290616		10056905	-.00736091
14.25	male	164.7	44.6	Higher s	61	low <2 h					-11994015		-.66626314	-.23248958
14333333	male	170.9	55	Higher s	66.5	medium 2					.39142138		-.33952427	.55628612
14333333	female	167.4	49.6	Higher s	64	low <2 h											12747924		-.94676481	-12531764
14.25	female	167.9	81.1	Higher s	89466667	higher >											-.72564954		13386689	.47142156
14666667	female	180.1	74.8	Higher s	54033333	low <2 h											-.20673011		.10145766	-.10017368
16166667	female	162	55.9	Lower se	63.2	low <2 h											.15352519		-.36613927	-12829413
14416667	female	162.8	63.2	Higher e	70.5	medium 2											.09615444		-.62691864	-.16369643
15	female	166	58.5	Higher s	67.5	medium 2											-.40546341		-.31727193	-.04153637
14416667	female	161.9	63.1	Higher s	72	low <2 h											-.22211599		-.05376861	100882
15583333	male	184.5	76	Higher e	74.4	higher >					-.0077173		18746489	.1004261
14166667	female	166.2	62.4	Higher s	78466667	higher >											-11981892		10535795	-.61808169
14916667	male	173.5	60.1	Higher s	73966667	medium 2					11350938		-.22123491	10816585
14583333	female	159.3	47.3	Higher s	77	medium 2											-.6508751		.68609583	.6082087
14583333	female	161.2	66.6	Lower se	77033333	low <2 h											.84609337		-.7514369	.6082087
14916667	female	155.2	47.5	Higher s	62933333	higher >											17579606		-12383075	-.97466112
14333333	male	172.4	72.8	Higher e	78933333	medium 2					.15995599		-.5405501	-.99652339
15.5	female	156.2	57		70												-1296408		28205296	-.69625083
15666667	female	155	46.3	Higher e	64.5	higher >											-1213018		12503224	.38848013
15.5	female	156.7	60	Higher e	70	medium 2											-16042119		-.03353909	-11653108
15916667	female	161.8	80.2	Higher e	90	higher >											-.77140601		11518198	.84301196
15.75	male	178.4	90.8		83						-.63644823		.28269005	.86794572
15.75	female	165.3	43.2	Higher e	57	higher >											-.04706568		.95824451	1009082
15333333	female	153	45	Higher s	65	medium 2											.99428188		-.78281544	.48614117
15.75	male	178.7	88.2	Higher s	83	higher >					-11357779		11067553	.32774595
15666667	female	163	51.1	Higher s	64												-10851952		17661173	-.00242647
15416667	male	175.9	61.6	Higher s	52	higher >					10892059		-.32777728	-.19438323
15.75	male	170.8	65.5	Lower se	71	higher >					-12799781		13389661	-.14492885
15.75	male	178.9	94.7	Higher s	87	medium 2					-12799781		24886929	30962698
15916667	female	148.9	46.2	Higher e	61	medium 2											-12653362		.39541336	-.25164732
15666667	female	161.5	66.7	Higher s	75	low <2 h											-14929839		17420647	.54484278
15.5	male	160.6	53.6	Higher e	67.5	higher >					-13109208		11061161	.05429582
15666667	female	168.3	64.2	Higher e	72	medium 2											-.71080332		.11717719	-10187837
15666667	male	172.7	63	Higher e	69	higher >					-15114165		1139576	.61921832
16.75	female	146.4	38.9	Higher s	60	medium 2											-12918865		24467797	.55991434
15083333	female	154.8	54.1	Lower se	69466667	medium 2											.00173893		13466188	.57893178
15166667	male	183.5	87.7	Higher s	60	medium 2					-.58739586		-.90872183	-.46777013
15.25	male	177.2	93.9	Higher s	94	medium 2					-12536162		.26741421	.92863435
16333333	male	170.6	63.2	Higher e	74	higher >							1015825	-.6325067
15166667	female	173.2	49.7	Higher e	60	low <2 h											-.54477022		-.49525462	.80856772
15916667	male	172.6	63	Higher e	52	higher >					-.47811526		-.16817103	-13357411
15833333	male	161.4	60.6	Higher s	71	higher >					.39927731		-.76399546	.10378158
16916667	male	168.7	78	Higher e	84.5	medium 2					-.31000371		-.2993393	.23099517
16.5	male	170.3	58.3	Higher e	68.5	medium 2					-.66826359		15139788	.06771123
15416667	male	173.2	59.7	Higher s	64	higher >					-12186819		.25551337	.14320233
17	male	172.6	53.4	Higher s	64	higher >					-12536984		12039246	-.60139154
15833333	female	172.4	57.5	Higher e	68.5	low <2 h											-.09798107		-.8893668	.76967512
13.5	female	165.8	82.7	Higher e	91	higher >											-10023411		.4214958	17665166
12583333	female	156.7	53.4	Higher s	60.5	higher >											.47075492		-.72737585	1743114
12.5	female	160.4	47.2	Lower ed	60	higher >											-11154805		-.48055717	13569138
13583333	male	154.7	40.7	Higher e	57	medium 2					-10902354		.27050408	.61392077
13583333	female	162.1	50.7	Higher s	66												-.87827551		-.29827231	-.89676228
12916667	male	153.2	49.7	Lower se	71	higher >					-.14686348		14686005	.71785499
12666667	male	147.7	49		71.5	higher >					-.37771639		-.71653209	.0389239
12666667	female	159	57.5	Higher s	66												-12961268		-.28955989	.56463239
13166667	female	164.3	81.5	Higher s	86	higher >											.82985621		-.81023874	-.48152222
12666667	male	165.9	45.9	Higher e	61.2						-10778924		12246565	-19207007
12916667	female	164	41.8	Higher s	56	higher >											-.49900446		.43264679	-17966281
12583333	female	156.4	46.4	Higher e	58	low <2 h											-.36635251		.55634191	-.21281217
12583333	male	151.7	44.6	Lower ed	65						-.21481135		-.97277562	-.00724137
12583333	female	155.9	61.3		82												.14385662		-.98679382	.64779535
12583333	male	155	53.9		69						.07098422		-12193393	-.34513308
13	female	153.3	33.9	Lower se	53	low <2 h											-1256697		-.40233295	.07567915
14416667	male	172	83.7	Higher e	85	higher >					-11216852		23570121	.26483915
14.25	female	164.2	78	Higher s	80.5	low <2 h											-.39987915		.38740395	.9404396
13833333	male	183.3	70	Lower ed	76166667	medium 2					-.45207632		-.25003069	.00949042
14166667	female	151.2	49	Higher s	66	low <2 h											11378346		-.85432578	.94533745
14416667	male	183.5	82.3	Higher e	81333333	medium 2					-.40029696		.0494928	10749897
14416667	female	158.6	46.6	Higher s	61666667	low <2 h											.38416305		.40448421	.93065219
15333333	male	183	82.5	Higher e	82	low <2 h					-.23341062		17239054	.63719899
14.75	male	184.2	81.4	Higher s	83	low <2 h					-.54937084		.53246304	-.09076603
14.75	female	160.1	55.8	Higher s	65566667	low <2 h											-10490165		30197997	.28577696
14416667	female	166.3	57.1	Lower se	66.5	low <2 h													.3750919	.77431668
14583333	female	152.1	55.5	Higher s	69.5	medium 2											.81308017		-10907801	-.09529179
16666667	male	173	60	Higher s	71	medium 2					-.72877872		-.88916734	-.3804684
13833333	male	166.5	72.3	Higher s	84	higher >					-.47314384		-.11410667	12924286
13833333	male	171.8	50.1	Higher e	64.4	medium 2					.57791035		-.68328851	-154354
14083333	female	160.2	56.6	Higher e	66.5	medium 2											-.77612392		30104484	-.45686617
14666667	female	166.8	63.2	Higher e	68.5	medium 2											-.20673011		.65589522	-14290047
13916667	female	158.2	47.9	Higher s	62166667												-.69351733		-.29344672	.10011072
13833333	female	160.1	59.9	Higher s	71233333	medium 2													18385812	.88677921
14.75	female	158.1	58.8	Higher s	73	higher >											-.78513056		130171	.12944385
13833333	female	157.5	57.1	Higher s	65.1														.08148673	15122055
14416667	female	152.5	59.1	Higher e	72.4	low <2 h											-.78038689		.02505622	.14897461
14416667	female	154	52.9	Higher e	64	medium 2											.07319519		.42986847	-.63270298
14666667	female	161	68.3	Lower se	76	higher >											-.82992992		-.86847406	.13432592
13916667	female	162.5	57.3	Higher e	67.6	low <2 h											-.90248176		.38799308	-10725312
14	male	157.5	46.9	Higher s	60.5	low <2 h							.55356804	.84445499
14416667	male	182	70.6	Higher e	71	higher >					-.9926923		.78563394	11425023
13916667	female	160	57.5	Higher s	68433333	low <2 h											-15012798		-.21995811	.6473436
14333333	male	167.5	58.2	Higher e	73	low <2 h					-.78193394		-.08187145	-.25387536
13833333	male	166	85.4	Higher e	94433333	medium 2					-.97876429		.61648496	.00949042
14	female	156.5	55.9	Higher e	70	low <2 h											.7272446		-10758789	.17339982
13916667	male	173.6	59.2	Higher s	74	medium 2					-.79415282		.57794555	.32570298
15166667	female	155	51.2	Lower ed	65.5	medium 2											-.30340471		-10563985	.65222775
14083333	female	153.5	70	Higher s	69.5	higher >											-11382357		.34627739	.16851351
14	male	174	62		71	low <2 h					.10621112		-.22936484	.30430246
14	male	178.5	60.2	Higher s	68066667	low <2 h					-.63811608		-.5649075	-.5734454
14166667	female	153.8	49.9	Higher s	67	higher >											-12503702		.40558649	.08545692
14083333	male	179.4	61.1	Higher e	68.5	medium 2					-14087368		.1865804	-.18971759
13916667	male	159.5	44.7	Higher e	62.5	medium 2					-.65374538		.06824623	.25818202
13916667	female	143	44	Higher s	65	low <2 h													-.03957699	.6473436
14583333	female	157	57.8	Higher s	77.2	low <2 h											-14262424		.67540785
13166667	male	148.7	41.6	Higher s	64233333	low <2 h					-13761039		-.03673509	22071046
14333333	male	172.7	55.9	Lower se	67233333	medium 2					-.84382545		-11365492	.01617846
13083333	male	156.3	39.5	Lower se	62866667	low <2 h					-.07524788		-.39622421	-.20319789
13.75	male	160.1	48.1	Lower se	70133333	higher >					.415518		-.98885816	.0308841
13916667	male	174.4	78.7	Higher s	90.7	medium 2					-.77754423		-.60568953	.86587069
13.25	male	151.3	42.4	Lower se	71.1	medium 2					-10005158		.1640883	-.31351649
13.5	male	167.1	85.7	Lower se	99366667	low <2 h					-.38221794		-12047593	23912121
13166667	male	175.3	58	Higher s	69666667	medium 2					-11566655		12904088	1126353
13666667	female	154.2	62.7		77066667	low <2 h											-.6341327		-.44338707	30857335
12916667	male	159	52.4	Lower se	73966667	higher >					1050111		-.89434153	-.02529644
14833333	male	153.7	43.7		62433333	higher >					-.4706305		-.11193806	.90050983
13.75	male	173.8	106.4	Lower se	10483333	higher >							.61255097	17865433
13.25	female	151.7	47.3	Lower se	66.3	medium 2											11796246		-1015499
12833333	female	168.9	66.7	Higher s	79666667	low <2 h											.59914855		-11253846	1180558
15583333	female	156.5	52.4	Lower ed		medium 2											-1089075		.10194629	28168963
12833333	male	151.4	42.5	Lower se	69933333						.48914903		-12454557	-.13902002
14583333	male	186	104.1	Lower se	98233333						-.12696606		-.98025736	10321925
13.5	male	167.6	64.3	Lower se	82833333	medium 2					-11444525		-.18942134	.29767581
16.75	male	171.4	58.2	Lower se	74633333	higher >					-13733514		.20992804
16416667	female	165.8	74.7	Lower se	88.5	low <2 h													.11396642	10485911
15666667	male	168	65.4	Lower se	77566667		1	healthy	-10488537	-.40695513	-.01831646	-10416171	-10918383	18346271
14.75	female	179	105.7	Lower se	11633333	low <2 h	1	healthy							-.25717465	.07336659	.47226404	-.05816958	-12059527	20836078
15.5	male	178.2	59.7	Lower se	72.6	higher >	1		-.51452996	-.57960912		-.53064183	-11888781	12696338
15833333	female	171.5	72.6	Lower se	75		1								-.16756564	-.62643801		-.24881209	-.67421396	31152807
15	female	175.2	56.2	Higher s	68	medium 2	1								13992057	.67633938		12605427	1811009	.11479955
15916667	male	161.2	56.4	Lower se	73433333	higher >	1	healthy	-.45636121	-14342196	.46524335	-.84182344	.23681284
14833333	female	156.4	54.3	Lower se	66.9	medium 2	1	at risk							17772056	.63198058	-.08164743	.57214559	26823312	16097314
16.25	male	159.9	50	Higher s	70266667	higher >	1		-.39326752	-.56266118		-.68152946	-11749426	11450369
16333333	male	178.1	82.3	Lower se	85633333	medium 2	1		14257668	-.3883962		.95425324	.4436115
16833333	male	180.8	104.6	Lower se	10266667	low <2 h	1	healthy	.56812267	11643622	11924657	-.27022388	10768043	14686906
15583333	male	177.7	73.9	Higher s	79.3	medium 2	1		.39137721	.46175988			-10391262	18559629
15.75	male	180.3	79.6	Lower se	79633333		1	at risk	46331842	38733842	-.33993483	25351827	33070945	-.41502874
15416667	male	179.5	66.4	Lower se	76.1	low <2 h	1		.81498968	.51094181	-.3798298	-.04325049	.06863384	.548305
17083333	male	178.6	76.8	Lower se	75533333	higher >	1	at risk	11354198	.9555863	-10067351	.9475373	.26409218	11344401
16	male	182.2	73		76833333	higher >							.14731644	-.00653441
16083333	female	161.8	48.2	Lower se	63966667	higher >											-.88087459			.98971138
16333333	male	174.9	63.5	Lower se	74633333	higher >	1	healthy	-.45348988	-.52247927	12383839	-.46402764	-.21783326	.92105974
17	female	162.8	44.7	Lower se	65166667	higher >	1	at risk							.10177605	.20980884	-.94610987	.5416848	27685689	17191283
15.5	male	176.4	64.5	Lower se	80533333	higher >	1	healthy	.12023025	-.59478749	.07544299	-.26483127	.9022425
16916667	male	176.3	71.9	Lower se	77333333	higher >	1		24731478	-11059548		-.18197311	-.7513702	.16341766
17333333	female	159.7	73.9	Lower se	83566667	medium 2	1								26851364	.77799995		16000296	.68849692	13870396
17.25	male	176.1	91.3	Lower se	88.1	higher >	1	at risk	-.53618483	.05959432	-.69472255	.56399389	.35710515	.14540338
16.5	female	167.8	75	Lower se	82	low <2 h	1	at risk							14449885	14600201	-1380634	70444346	18738535	29992121
15666667	female	164.5	47.2	Lower se	63333333	low <2 h	1	healthy							-.64378484	-.41626102	17662421	-.44054203	-1166965	30466451
16.5	male	171.2	62.3	Lower se	71666667		1	healthy	11677313	-.09019771	.64145883	-.29187653	.29292465	-10807113
16	male	172.6	64.3	Lower se	75033333	higher >	1	healthy	12786267	-.40184566	-.85960598	.00205513	-.47009778	18843882
16833333	male	189.1	62.1	Lower se	71133333	higher >	1		.1253844	18864686		.17291927	-.26360081	-.28819351
17333333	male	165.2	57.4	Lower ed	70733333	low <2 h	1	at risk	-.04235538	.58208165	-14635412	.29709018	-.08403535	.66484355
16833333	male	170.6	58.6	Lower se	70433333	higher >	1	healthy	.67880724	18864686	-.62918321	-.39981199	-102732	-.28819351
15916667	female	167.2	65.9	Lower se	72.9	low <2 h	1	healthy							.07062842	-.28824131	-14570964	-.28100665	-.39841252	15467215
16416667	male	171	57		71.3								.86544624
16916667	male	185.4	89.9	Higher e	90433333	higher >	1	at risk	.78479691	-.05127517	-17562805	-.04911791	14464352	-.10689239
16666667	female	163.7	62.8	Lower ed	71.4	medium 2	1	healthy							-.40976979	-.49399421	14214048	-.0750389	.05139632	2442227
16583333	male	176	64.6	Lower se		higher >	1	at risk	-.08127173	14647663	-1077108	.24782806	.19490292	1397482
17416667	female	170	56.7	Lower se	70433333	higher >	1	healthy							-.89226271	-.25368166	13141633	-.20414071	-.32781672	-.02682394
15666667	male	169.8	55.8	Lower se	70166667	medium 2	1	healthy	.60737453	.83083598	.26458862	-.23542282	-.75910838	-.59619044
17.25	female	157	57.9	Lower se	72266667		1	healthy							-.51206397	.1995517	10074081	.53358039	-.45055538
16916667	female	158	56.6		71333333		1								.95617676	-10537042		.28803767	-.59027234	.00251126
15666667	male	174.6	73.1	Lower se	79266667	higher >	1	healthy	.11050605	.72762348	-.36359344	-.73420952	.2135957
14666667	male	167.5	84.6	Lower se	91433333	medium 2	1		-.63110216	-.57519896		.11567552	-.64362718	49264379
14333333	female	158.5	51.6	Higher s	69733333	higher >	1								.29048681	11797417		-.66976805	-.01956118	.07568986
14.5	male	160	82.5	Lower se	95266667	higher >	1	healthy	.12345837	.20683503	-10154847	-.37488087	-.01167314	22012907
14083333	female	159.8	66.8	Lower se	80866667	medium 2	1	healthy							14025962	-.22978757	-15729042	-.59946518	14739406	.63754828
14.75	male	176.7	65.9	Lower se	74833333	medium 2	1	at risk	.71573321	.83179634	-11095913	.5526763	12869897	10569193
14.5	female	148.7	59.6			medium 2	1	at risk							.29522592	-.96005107	-19299278	.01180641	11705398	13165982
14916667	female	165.7	65.6	Lower se	74633333	higher >											-16481123		.5332396	2777368
13833333	female	176.9	67.9	Lower se	73466667	low <2 h	1	healthy							-.13609119	-.67748256	-13653969	.14820993	-1035571	19030969
14416667	male	162.7	61.1		81366667	medium 2	1	healthy	-.53375474	-.70284433	-.32509252	-.47040431	-.65833521	-.2077487
14	male	173.4	65.3	Lower se	77233333	medium 2	1	healthy	-.56471647	-.94846734	.00372177	-.57099422	-.72206039	-.23585007
14333333	male	165.7	55.8	Lower se	68366667	higher >					.00059349		-.87606505	13664476
13583333	male	161.6	44.6	Lower se	64833333		1	healthy	-.45779381	-.71863122	15395677	-.53838626	-11526077	.47885969
16	female	162.3	51.7		68.7	higher >	1	healthy							-.16285614	-.75390142	15722289	11367103	-12265093	-.41292831
14916667	female	156.2	62.6	Lower se	82.4	higher >	1	at risk							.36601766	25138571	-11860972	-.24769646	.13510911	31682043
16166667	male	177	61.1	Lower se	68866667	higher >	1		-.80272048	.27152318	-.60751041	-.31261517	-.78371252	.5585228
15.25	male	181	56.9	Lower se	65.7	low <2 h							.29431244	11986918
14.75	male	179.1	63.4	Lower se	71233333	higher >	1	at risk	.96400627	13268686	-11676371	.17106956	-.13571064	11919411
16.25	male	174.5	97.1	Lower se	10143333	low <2 h	1		-.8353666	-14729298		-.78450292		.80732336
15.25	female	168.4	74.5	Lower se	89.1	low <2 h	1								-.3019023	-.86049921		-.43448786	-.40788944	.80369918
16	female	155.1	44.8	Lower se	64.4	higher >	1	healthy							-.78201873	-15322401	-.31624619	-.28906597	-13414453	-.80389462
16	male	163.7	51	Lower se	71666667	low <2 h							.76473065	.53372918
17166667	male	168.3	54.8	Lower se	69633333		1		.93693946	.64537845		-.34128724	.55154685	12483075
16333333	male	167.4	62.4	Lower ed	77.9	higher >	1		20061254	18072323	-10878351			.58332791
15583333	male	179.4	68.2	Lower se	76.9	medium 2	1		-.29864555	.71866032		-.42325115	-.04096711	.43802932
15416667	male	181.1	121	Lower se	11336667	higher >	1	at risk	-.37163329	1408298	-.1841014	12250101	24994835	22362328
16	male	180	88	Lower se	97.3	higher >	1	healthy	.450089	.32762917	-.14372138	.34680988	-.32848901	22895859
16.25	male	176.3	67.9	Lower se	74366667	medium 2	1	at risk	2839582	.76921289	-11248888	92990551	26901213	14152078
15	female	161.9	70.6	Lower se	84.1		1	healthy							-.9274564	.42360568	-.57125335	.02853244	.39883516	1209151
15666667	female	160.8	57.8	Lower se			1	healthy							.09294403	-.06645103	.78122789	-.08928911	.21472389	-.08060779
12666667	female	171	64.7	Higher s	77.4	medium 2	1								12764828	.88987984	-11498955	-.06337044		26768853
13416667	male	159.8	53	Higher e	68233333	low <2 h	1	at risk	1457238	-.68341036	-10381511	.6334414	.9168813	.6567689
12833333	female	162	52.9	Higher e	72366667		1								-.28284758	.16953208		-.06346747	-.48098201	13370007
13	female	168.6	60.4	Higher s	75633333	low <2 h	1	healthy							-.60241442	-.74040356	.00654715	-.22567489	15974797	15617065
12666667	female	163.2	51.1	Higher s	67533333		1	healthy							-.64186729	10415183	.0824021	-.08725105	-.13579203	.32993762
12916667	female	157.4	44	Lower se	58866667	low <2 h	1	healthy							-.81137099	.36666218	.00262393	-.49841589	-.86811029	-.07586427
13.5	female	159.5	45.7	Higher s	61733333	low <2 h	1								-.76449149	.27765718	1821751		-10859405	.28092325
12666667	female	161.3	44.2	Lower se	59233333	low <2 h	1								-11731027	-.02380378		-.44187231	-.88858597	.32993762
12666667	male	150.6	41.7	Lower se	66.7	low <2 h					.30076345		.01743558	-.50166219
12.5	male	151.2	42.1	Higher s	65.9	higher >					.30503984		-10448327	.01416988
13666667	male	151.6	52	Lower se		higher >					11353525		-1084888	.72755785
13083333	female	149.6	42.8	Lower se	63166667	medium 2											.01482633		-.642387	-.16383257
13333333	female	155.6	46.4	Higher s	67266667	low <2 h											.85677638		-.7182197	13854574
13.75	female	160.7	51.3	Lower se	69.5	medium 2											-.93807785		20158277	10480505
13333333	male	175.6	61.8	Higher s	71.3	medium 2					.37777115		.54616774	15562162
13416667	female	151.8	40.3	Higher s	61333333	low <2 h											-.51274232		-.54258556	-.10514322
12.75	male	162.5	55.9	Lower se	79933333	low <2 h					18029678		-.79894928	.08508249
13166667	male	146.6	39.7	Higher e	63433333	low <2 h					17788154		-11556717	11939
12666667	female	173.2	46.4	Higher s	64766667	low <2 h											13071704		-.62918629	-.2176835
13166667	female	154.5	36.7	Lower se	61033333	medium 2													-.65519003	.53512291
12916667	male	151.1	36.7	Lower se	62333333	higher >								.24494044
13083333	male	157	42	Lower se	64.4	medium 2					-.53946171		.11086733	.13455639
15083333	male	183.6	74.4	Lower se	80266667	medium 2					10496535		.07971002	.63382396
16.25	male	168.7	57.9	Higher s	69366667	medium 2							.60675412	.19943893
14416667	male	172.3	55	Higher e	68.8	low <2 h								.1973266
14666667	male	180.2	67.1	Higher e	75333333	medium 2	1		-.49317324	-1018542		.10013505	.25387871	18884421
15416667	male	182.6	67.5	Higher s		medium 2	1	at risk	20568044	-10314313	.11274543	.9223565	.476371	-.53196878
15333333	male	178.2	64.7	Lower se	72966667	medium 2	1	healthy	-.25635718	-12321874	19181902	26973187	-.68423942	232509
15.5	male	183	67.7	Higher s	73466667		1	at risk	-.65252131	.3649433	-.46033625	23369998	.5355531	1539709
14583333	female	158.3	51.7	Higher s	66	medium 2	1								-.70364336	.76123318	.21632333		-.30788591	.53004198
14583333	female	170.5	64.5	Lower se	73833333	medium 2	1	healthy							-.58585013	.29064573	.1172524	-.10058684	-.36132579	12335425
15.25	female	162	49.6	Higher s	61366667	low <2 h	1	healthy							-.89102684	-.68537856	.79220646	-.33742458	-.6777777	.17832857
15166667	female	183.5	56.1	Higher s	64833333	low <2 h	1	healthy							-.42207564	-.34964161	13792806	-.13270798	-.82125247	17466075
14.75	female	168.1	55.3	Higher s	66566667		1	healthy							-.66945808	.56239608	16907033	-.48060107	-10790332
14916667	female	163	53.3	Higher s	67433333	low <2 h	1	healthy							-.54694183	-11187047	20464823	.05584859	-.71592821	.9795207
14833333	female	170.6	52.1	Higher e	61666667	medium 2	1	healthy							-11382889	-.18023371	10328083	-.72827736	-.71778835	-.03177149
15083333	male	174.1	51.9	Higher e	67566667	medium 2	1		-.10375293	11042346	.80478224	-.91695362		.161237
14916667	male	177.1	55.1	Higher s	69666667	medium 2							-.37129172	.27152329
15333333	female	168.9	57.8	Higher s	67033333	low <2 h	1								-.68250684	-.22939286	10637964		-.23233893	27531549
14.75	male	163.5	56.1	Higher s	70166667	low <2 h	1	healthy	-.99459235	-.18118432	-.46077354	.34000105	-.06776077	.78687569
14.5	male	170.6	53.6	Higher e	68066667	medium 2	1	healthy	-.89723546	.00728548	12666716	.44521068	.2360641	.64851834
14833333	male	161.5	45.8	Higher s	65033333	medium 2	1	at risk	12350105	.16311548	-.4819705	16812549	10616143	-12598417
14583333	female	165.4	57.7	Lower se	71133333	low <2 h	1								12693932	-.02298903		-.5540791	-.97855638	14680426
15416667	male	170.1	64.8	Higher e	78033333	higher >	1	healthy	11185444	-.1711303	13256021	-.56466099	-.07435731	10209248
15333333	female	187.3	75	Lower se		low <2 h	1	healthy							-13305899	-12910504	1273499	-.57794657	-.78548766	-.21741482
14666667	male	178.5	58.5	Higher e	67633333	low <2 h	1		11068023	-.51564541		.150066	-.92108957	.26817771
15083333	male	180.2	63.1	Higher s	72433333	low <2 h	1	healthy	-.60035254	-.99155627	.19503373	.21423941	-.9919407	13764606
15	male	177.6	59.1	Lower se	71.7	low <2 h					13180038		-.89962114	.18262443
15583333	male	179.9	74.2	Higher s	77933333	medium 2					12504482		-.72481229	.97819449
14416667	female	169.1	70.7	Higher s	78	medium 2											.67252516		-.37307597	-12580451
14.5	male	170.1	55.9	Lower ed	69.9	low <2 h					-.46894463		-.71807816	-.09411191
14583333	female	155.6	51	Lower se	70766667	higher >											26427222		-1141548	21715431
15.25	female	161.8	57.3	Lower ed	72.6	higher >													-.79134454	.02198592
14416667	female	166	55.6			low <2 h											.79436445			.30531012
14583333	male	171.4	65.6	Higher e	74366667								-.66315606
14.75	male	175	66.3	Lower se	73466667	higher >					15891894		-.79680621	-.76587505
15583333	male	166.3	68.5	Lower se	79266667	higher >					26273002		-.4671315	11132358
15083333	female	161.1	65.3	Lower se	79.4	higher >											.55128658		-.33411551	16732958
15.75	male	176.1	59.6		69933333	higher >					.20475721		.16092095	.32774595
14333333	female	157.8	52.1	Lower se	68	higher >											15718569		-.97882949	-.54965899
14.25	female	167.5	64.6	Lower se	72.8	higher >													-10207889	25820027
13916667	female	158	48.8	Higher s	59.6	low <2 h											10848329		-.89738944	.10011072
14166667	male	161.5	52.8	Lower se	77166667						.60265022		-.72685923	.05895974
14416667	male	161.9	54.2	Lower se	69033333	higher >					.79155711		-.75176851	-24356628
14166667	male	174.7	60.1	Higher s	72366667	medium 2					16972948		-13214637	-.75123064
16.75	male	170	51.8	Lower se	64.3	higher >					15575452		-11785524	.13863961
15666667	male	173	72.2	Higher s	79733333	low <2 h					.6159456		-.19983893	.07903665
16416667	male	167	86.3	Lower se	93166667	higher >					23670573		-.67281949	.69706037
14.25	male	162.7	85.1	Lower se	94.5						23495266		-.77244048	1995491
14833333	male	151.7	66.4	Lower se	86066667	higher >					13269572		-.9825469	13055757
15.25	male	184.4	56.8	Lower se	71.3	medium 2					1162647		-.19410272	-.28662433
15166667	female	167.6	64.2	Lower se	77	medium 2											-.48731397		.06856133	-.52032202
15083333	female	182.3	62.9	Higher s	68.8	medium 2														.18808747
16333333	male	174.5	69.2	Higher s	76766667	higher >					10186036		1467647	-.2272285
15.5	male	176.9	62.2	Higher e	73	medium 2					1875823		-.90713608	-.62089198
15333333	male	180.5	71	Lower se	75.6	higher >					16269652		-.53841995	13123554
15.5	male	156.8	41.2	Lower se	62433333	medium 2							-.90855186	-.48585442
15.25	female	163.8	62.2		72066667												.80133074		-.26492883
15583333	female	157	53.8	Lower se	70566667		1	healthy							.12002468	.6959523	-.60394435	-.3812052	.03513562	.86242422
15583333	female	159.5	54.4	Lower se	73966667	low <2 h	1	healthy							-.85235586	-.46707474	15624972	-.2754218	-.91758455	-.46661681
15.5	male	174.1	72.1	Lower se		higher >	1	healthy	.56180257	-.08204639	.38778215	.67136494	-.03217836	-.75592953
16.5	male	181.2	70.1	Lower se	72833333	higher >	1	healthy	.64244273	1049053	-.38195121	.29119221	.13427261	36480875
16.5	female	167	62.9	Lower se	72	low <2 h	1								-.29631009	-.78201623	10708161	-.19649945		15912923
15583333	male	157.5	40.9	Lower se	61.6	low <2 h					.585946		-.20945071	-.97990422
16166667	female	158.3	50.4	Lower se	63.5	low <2 h	1	healthy							-.21713503	-.08900219	17311227	-.56651367	-.79652206	-10483397
13916667	female	156.7	52.9	Lower se	71.4	higher >	1	healthy							-11646691	-11331632	.34360301	-.32634817	-.321506	-.52529829
12833333	male	154.7	47.7	Lower se	71.8	medium 2	1	healthy	-.05510526	-.68588597	-.87793734	.41576116	.56653657	.19879849
12583333	male	164.2	60.1	Lower se	79766667		1	healthy	11214612	-.71589959	14862352	-.47935867	-.30960446	.263072
13.25	male	155.2	72.2	Lower se	91.7	medium 2	1	at risk	23789682	19345206	-.53221012	.86389993	-.15032994	-16643823
13.75	male	165.2	57.4	Lower se	79.9	higher >	1	healthy	.11218598	.41197996	-.45654182	-.35729865	-11885033	-.50931873
14166667	male	169	84.8	Lower se	94.5		1	healthy	.61200104	.24681526	.53852956	-.51065757	-.01616527	11392136
13416667	male	161.6	67.1	Lower ed	91133333		1	healthy	.71164754	.04211681	-.42097015	-.49053565	-11875275	17373531
15083333	male	175.2	78.3	Lower se	80133333	low <2 h					10685766		.88097067
14.75	male	179.2	77.6	Lower se	81366667	higher >	1	healthy	-.36011674	-.14929977	.09790696	-.23505671	-.25179166	.24678848
13	female	150	52.8	Lower se	76033333	medium 2	1	healthy							-.80886142	-.97627564	-.48398584	-.56682867	.59623659	-14103482
14333333	male	166.7	48.2		68866667		1	healthy	.98843177	-.06414026	-.17863626	-.87112921	-12540502	-10640368
14166667	male	168.1	76.7	Lower se	91033333	medium 2	1	healthy	-.40884452	-.4593385	23601534	-.57747849	.56003482	-.34613545
12916667	female	154.3	57.3	Lower ed	74766667	higher >	1	healthy							-.48690159	-.43100606	-.45502617	-.12504812	17574672
14083333	male	166.2	51.6	Lower se	65	medium 2	1	at risk	19137375	1479174	-.54181878	12677288	22818998	-.45978705
13166667	female	171.1	69.8	Lower ed	79.7	higher >											-11885006		19204897	.69152985
14666667	female	166.5	56		72.9	medium 2	1	healthy							-.11230345	-.43918903	12129459	.18997764	-10902491	12286573
14916667	male	174.7	58.6		72.3	low <2 h	1	healthy	24439895	.70722263	-10027421	-.670157	.76121246	-.40358937
15	female	171.4	59.3		70333333		1	healthy							-.39733086	-.83455662	.49655275	-.63052737	.02207732	.89647912
15833333	male	164.7	52	Lower se	69933333	medium 2	1	healthy	.128392	.23021909	-11727053	-.72725814	-.72434826	-.50396531
14416667	male	175.8	92	Lower se	98033333	medium 2	1	healthy	-13337767	-11849584	1976271	17419032	-.97119519	16826027
14833333	male	165.2	48.3		66366667	higher >	1	healthy	-.28223377	-.5775812	-.11019799	-.62663559	13121798	.63046589
14.5	male	176.1	90.4	Lower se	91933333	medium 2	1	healthy	-.95240809	.09948735	.66942831	-.42438106	-.5241353	.98607754
14416667	female	168.7	53.3	Higher s	68233333	higher >	1	healthy							27076549	.44785444	22740302	.18080516	-10303949	.30531012
13416667	male	153.5	40.6	Lower se			1		-.42054534	-.21138078		-.21844704	-.0432729
15166667	female	165.7	62.2		72.8	low <2 h	1								-.15698623	-.42473413		-.23717027	-.40974699	-13801919
16166667	female	163.1	66.2	Lower ed	78.4	medium 2											-.87700369		.48927993	-.97013913
15	female	165.5	55.3		64533333	higher >	1								.6629202	.21918872	-.13715942	-.21534724		-.04153637
15.5	male	165.4	61	Lower se	74666667	higher >	1	healthy	.45140949	-.97903037	.39172981	-.16870816	-.99349922
14416667	male	165.9	66.9	Higher e	80666667	higher >	1	healthy	.84559355	-.55959334	-.32509252	-.82121637	.51665929	16826027
14833333	female	158.3	49.9		65333333	higher >											-.16329021		-12976123	-1438774
14.75	female	159.4	54.6														.08874238		-.47783541	.44211008
16166667	male	188.4	103.4		93766667	medium 2					-13374819		-.24979741	.15328724
15416667	female	165.2	53.4	Higher s	69333333	higher >													.36276641
14916667	female	171	55.7	Higher s	71533333	higher >											.49914602		13201485	-.42749021
16333333	female	161.9	56.3	Lower se	70.7	medium 2													21332376	.42774697
16583333	female	152.7	55.9	Lower se	70666667	higher >											.68114906		.54955647	19776185
16.5	male	173.2	68.7	Lower se	76.3	higher >							.61589489	-13509284
16833333	female	151.1	53.7			low <2 h											-.72592762		24688809	-.85322582
17083333	female	155	60.9		78233333	low <2 h											-.29354599		16685043	.54053078
16166667	female	160.4	46.1		66.2	higher >											-.17731619		.61090985
17333333	female	166.2	64.4	Lower ed		low <2 h											.50751336		.23226899	.13461991
16833333	male	164.5	76	Lower se	86466667	medium 2					-.937546		.35559265
17416667	female	170.3	58.3	Lower se	71.1	medium 2											.78170337		-13193005	-.96622343
16.5	female	161	64.7	Lower se	81666667	low <2 h											-.6829072		2754866	12784212
16333333	male	188.3	77.2		79666667	higher >							.88268618	-11053313
16916667	male	180.1	100	Lower ed	94333333						11586272		-10616986	-.98540003
17166667	female	163.8	52.8	Lower ed	66.6	higher >											-.75993008		.56558886	-.71651743
15833333	male	165.3	48.5	Lower se		medium 2					-13280654		-.22026241
17166667	female	152.1	68.7	Lower se	86866667	higher >											21235639		-10596891	-.24694083
17333333	male	173	64	Higher s		low <2 h							-.21445623	.66484355
13	male	163.3	60.5	Lower se	77.5	higher >					.86891106		-.7784215	-.72224695
13583333	female	161.9	67.9	Lower se	75733333	medium 2														13706342
13416667	male	155.9	43.3	Lower se	65.5	medium 2					-.52199479		39956058
12.75	male	151.8	56.9	Lower se	84.1	higher >					10636123		-10638953	.22021925
13.25	male	167	76.3	Higher s	82.4	medium 2					-.73763131		33932486	.22682982
12916667	female	166.3	43.6	Lower se	64266667	higher >											-.54673083		-.33470631	-.07586427
12.75	female	161.1	59	Lower se	70.5	higher >											.74844123			.16857698
13.25	female	152.4	42.5	Lower se	59.5	higher >													.19676023	.45201238
12.5	male	148.9	44.6	Lower se	73.8	medium 2							.26177315	.0817535
13	male	153.5	50.1		70066667	higher >							-.39737163	-.24936238
13.25	male	161.6	46.8	Lower se	67633333	low <2 h							.47567394	15776956
13.25	male	147.5	33.4	Lower ed	54.4	higher >					-.16264989		.45018057	-.78631951
12583333	male	174	58.4	Higher s	72533333	higher >					.15485557		-.13956058	.06033697
13	male	174.5	60	Higher s	74.9	medium 2					-.03842171			33986043
13416667	male	151	53.4	Lower se	80333333						-.38490219		10542485
12916667	female	150.9	50.3	Lower se	78033333	higher >													-.19834739	.54986805
12.75	male	166.9	72.1	Higher e	85466667	medium 2					-11859581		-.67710243	.89590307
15833333	male	192.2	127.8	Higher s	10666667	higher >					-.76308873		.26683179	.9816382
16166667	male	182.5	71.5	Lower se	75166667	higher >							31222235	13014547
16583333	female	172	72.1	Lower se	77.4	low <2 h											-12723093		.27948699	1664728
15333333	female	160	49	Lower se	63.3	low <2 h											-.72848285		-.1935918	-10773166
17	male	172.9	79.8	Lower se	88.7	medium 2					-19378843			.68268088
15416667	female	163.1	63.8	Higher s	75833333	medium 2											.32183478		.38681692	.16857094
16833333	male	177.3	58.3	Higher s	70.9	medium 2					.96059908		-10712444	.92811084
16.25	male	180.1	115.3	Higher s	116.8	higher >					-16629285			29011475
15666667	male	178.5	67.5	Lower se	76566667	medium 2					-.27709577		11608141	.34912749
16.25	male	179.5	70.5	Higher s	78.4	medium 2					-.43864986		-.80104123	.26698165
16416667	male	176.8	79.3	Higher s	81066667	medium 2					-14242312		13682863	17103136
16333333	female	156.1	54.7	Lower se	73.3	higher >											.49784068		-.88377353	-.43254893
15.75	male	180.1	60.3	Lower se	72133333	higher >					-.71453371		13007363	14756705
16666667	male	170.4	58	Lower ed	73933333	medium 2					-16254743		-.45281788	.90322799
16	male	175.5	60.5	Lower se	70.1	medium 2					-.65719481			-.88446275
16083333	female	162	61.6	Lower se	73466667	medium 2											-16357228		13106911	32574185
15833333	male	172	68.8	Higher s	77366667	higher >					.00445097			-.03127328
16416667	male	172.5	59.5	Higher e	74.7	medium 2					-.22209327		-.55808696	28586674
16916667	female	156.6	55.6	Higher s	71433333	higher >											13818365		.69358797	-1092908
15583333	female	161.4	59	Lower se	73.1	low <2 h											-.40380374		.39056839	17223919
16666667	male	189.3	76.3		75.1	higher >					.22257177		-.90050109	-.11021653
14916667	male	149.1	40.9	Higher s	63	medium 2							13133082	-.33607811
14416667	male	168.4	60	Lower se	69733333	higher >							13349085	18851403
13833333	male	162.8	45.4	Lower se	62.3						-.02668318		-.96646356
13.25	male	152.6	41.3	Higher s	67166667						-.48027305		-.02003049	-.11088663
12583333	male	156.6	60.5	Higher s	86966667	medium 2					-.03040742		-.66386256	13443255
14083333	male	176.4	97.2	Lower se							.40652012		.34514511
14.25	male	159	54.6	Lower se	74733333	higher >					-.42619942		.44505969	-.30000414
14166667	male	172.5	83	Lower se	91933333	medium 2					-.12583312		-.79198258	27595943
14666667	female	157.3	68.9	Lower se	89.9	higher >											-.18984769		-.99806549	-.4128398
12916667	male	154.8	50.6	Lower se	72233333	medium 2					-.06756237		-.4183532	-.70088865
13.75	female	158.7	59.4	Lower ed	76833333	higher >											-.17427093		-.94125886	32371092
12666667	female	159.2	58.1	Lower se	72933333	higher >											.03257289		20129466	23639589
13416667	male	162.8	59.8	Lower se	82833333	medium 2					-.59563072		14068715	-.69396142
13666667	female	165.5	51.6	Lower se	72833333	higher >											-.6844841		.93565283	.19295262
13	male	174.5	60.5	Lower se	73333333	higher >					-.46528725		12344851	-.51958214
13.75	male	157.8	37.2		55.6	higher >					-10977081		36638654	-.03664126
14916667	male	174	76	Lower ed		medium 2					-.28138081		-.40385121	11491698
15916667	male	165.5	50.5		64.9	higher >					-14142095		.78056739	11628723
15	female	155.7	62	Lower ed	76.9	higher >											-10391085		-.84232806	-15267276
15.75	male	177.3	72.4	Lower se	75566667	higher >					-.71453371		14621511	12055706
14	male	165.7	66.5	Lower se	85233333	higher >					-.81959419		12119112	2870027
15.5	female	169.5	63.7	Lower se	77333333	medium 2											17437567		-12454494	-.85260416
15583333	female	162.5	59.1		67866667												-14291842		37591624	21914653
15166667	female	162.9	63.1	Lower se	76.5	higher >											19178346		-.6195079	15902676
15583333	male	181.9	57.8		73166667	medium 2					.43691023		-.6611	-.57478035
14166667	male	155.2	42.1	Lower se	65166667	medium 2					.68392001		-.43592774	-.48116718
15083333	male	168.6	79	Lower ed	93666667	low <2 h					-.91232468		.08112568	-.4463748
15.75	male	171.3	74.5	Lower se	88.6	medium 2					-.0477038		-.34456237	.73289578
16.5	male	167.3	52.8		69866667	higher >					-1491297		18284498	-18913626
13.75	male	165.4	52.3	Lower se		higher >							-12649632
14166667	female	160.4	88.5	Lower se		higher >											.66962393		-.86301023	32122952
15166667	male	174	62.4	Higher s	70.3	higher >					.49542944		-.5802856	-.87284991
13583333	female	159.4	47.5	Higher s	66766667	higher >											.10361517		.42067184	-.74039011
13.5	male	153.2	46.7	Lower se	66066667	higher >					-.25145765		-.74594551	-14581933
14416667	male	181.9	58.5	Lower se	67066667	higher >					-14058516		.49684011	16150901
16083333	male	178.4	85	Lower se	93.9	higher >					-11767424		-.32738073	.71496462
15.5	male	180.4	61.1	Lower se	71566667	higher >							-.64521508	-.35081686
16	male	167.3	55.6	Higher s	71133333						29163323		-11866381	-10195287
14.25	male	183.4	113.2	Higher s	10293333	medium 2					14239142		-.93524573	25356075
16.25	male	187.4	76.8	Lower se	81366667	medium 2					.15526332		-.61833942	.26698165
14916667	male	163.8	68.1	Lower se	88.3	higher >					14047265		-.28776953	-.20105557
16.25	female	159.2	54.5	Lower se	68333333	higher >											.3698436		20751153	-13660955
17.25	female	169.4	53.3	Lower se		medium 2														.68738239
14666667	male	166.8	73	Lower se	85766667	higher >					.3240992		.57522545	.80826585
16.25	female	166.1	61.2	Lower se	80366667	higher >											13995815		-10459902	.58901758
15333333	male	175.6	73.2	Lower se	79933333	higher >					.1366005		15072998	21225431
14916667	male	157.1	45	Lower se	61.8	higher >					-.89959305		12255392	24318838
16916667	male	185.1	70	Lower se	74.2	medium 2					.47747496		-.21431781	.29857268
14916667	male	176.9	85.1	Lower se	88.6	medium 2					-.30937647		.35351096	25669063
15083333	female	166.3	41.1	Lower se	63433333	medium 2											.47041521		.41940926	-.12458798
14666667	female	159.8	44.8	Lower se	60233333	medium 2											.66010365		17894862	.83782469
14.75	female	165.5	58.6	Higher s	68133333	higher >											-.64205271		-.24537227	18491082
15.75	male	172.5	67.5	Lower se	74.8	higher >					.54738287		-.31482806	.26022098
15833333	male	176.1	44.8	Lower se	64433333	higher >							-.88010513	.91411077
16.75	female	167.6	60.2	Lower se	73833333	low <2 h											.81629199			.40344837
15583333	male	165.9	77.5	Lower se									-.7205648	.43802932
16083333	male	178.7	57.3	Lower se	70733333	higher >					.0764746		10363736	-.7032915
15	male	171.1	55.4	Lower se	69.1	medium 2					-.21255828		-.49191669	.5876949
14.75	female	169.7	68.4	Lower se	75.1	medium 2											10844839		.54019283
16333333	male	176.1	60.8	Lower se	72866667	medium 2					.3349053		.78070754	.65087427
15166667	male	169.5	52.9	Lower se	70.4	higher >							.82830945	18951953
16583333	male	180.9	76	Lower se							-19933951		.04190737	14650405
15333333	male	182.5	67.8		75066667	medium 2					-16375957		.09016105	11773241
15833333	male	168.2	53.4	Higher s	70133333	medium 2							-10811731	.30636388
15833333	male	165.5	56.9	Lower se	72.3	medium 2					15589329		-10471898	.9816382
15.25	male	169.4	51.5	Higher e	69	low <2 h					.48583988		16024156	.92863435
15.5	male	187	67.7	Higher e	72466667	low <2 h					-120311		16030581	-.41833564
15583333	male	180	70.7	Higher e	77233333	medium 2					-.60993565		-.54924955	.57307061
15166667	female	156.9	51.7	Higher s	66.4	higher >											-.64292467			.02686787
15583333	female	162.4	50.8	Higher s	64766667	low <2 h											-1110378			15660342
14833333	female	166.9	58	Higher s	68666667	low <2 h											-.25867436		-10504523	19223987
15833333	male	179.5	60.3	Higher e	72.6	higher >					.21728224		-.6082386	-.43643788
15.25	female	173.9	68.9	Higher s	73.4	higher >											15462106		-.66441689	-.13435674
15833333	female	164	48.7	Higher e	63933333	low <2 h											.68899868		-12835909	11606094
15666667	male	177.2	62.7	Lower se	70.8	medium 2					-12751458		.28155755	.95683187
15083333	male	167.5	51.3	Higher s	70.8	low <2 h							-.81215254	-13240363
15.25	female	164.3	51.9	Higher e	63933333	low <2 h											-10682839		.12921492	15072411
14833333	female	171.2	57	Lower se	64.8	low <2 h											16426503		-10344203	14533978
15.25	female	164.1	49.1	Higher e	59833333	low <2 h											-.59954447		1574854	.2564999
15583333	female	174.5	52.3	Higher e	64.1	low <2 h											.49546847		-.22809843	-.31025905
15333333	male	182	67.9	Higher s	74666667	low <2 h					-11533438		19985556	-.10547307
15416667	female	173.7	63.4	Lower se	69166667	medium 2											-.91832347		.04476524	14193656
15083333	female	158.9	50.7	Higher s	65566667	medium 2											-.37338466			20641402
15.25	male	172.7	62.6	Higher e	74	low <2 h					-.96100224		12909625	22114074
15.75	male	180.2	61.5	Higher e	70466667	medium 2							.03632002	-.21245382
14916667	female	163.9	59.6	Higher s	67733333	higher >											-.72635079		.77104908	.74501888
15416667	female	170.4	79.3		85533333	low <2 h											14951213		-1002768
15666667	male	175.8	57.2	Higher e	68666667	medium 2					-.09740159		-.69822588
14916667	female	160.6	55.8		72533333												-.81529225		.78440917
16666667	female	166.3	60.2		74.3	low <2 h											-.58582947		-10396496	.56476238
16333333	male	179.2	84.5	Higher s	92.2	medium 2					-14016915		-.86511433	.04295697
16666667	male	175.2	68	Higher s	75766667	medium 2					-12558452		-.48115226	-17992907
16666667	male	174.9	65.4	Lower se	74	low <2 h					.05935745		.27254227	.02490941
16333333	male	178.7	105.3	Lower se	107.1	low <2 h					-.08291006		-.84386878	.71842064
16333333	male	184.9	78	Higher s	79.9	higher >					-.54201078		-12107086	-.36232123
16.5	male	168.6	51.7	Higher s	67733333	low <2 h							-.02721251	.06771123
16	female	170.9	64.5	Lower se	73333333	medium 2											-.92478523			10727437
16.25	male	177.2	66.1	Lower se	77.6						-.00938847		-.95824976
15.75	female	173.9	47.1	Higher e	63933333	low <2 h											12489755		-.63863722	.77453002
16333333	female	173.7	71	Higher s	76												-.46419331		.14016555	.42774697
16	male	172.2	68.9	Higher s	79.3	low <2 h					20963552		-1103089	.73632803
16	female	170.8	54	Higher s	65.8	low <2 h											.66441831		-.55827671	.2126178
16166667	female	161.9	62.2	Higher s	79.7	medium 2											-.32023354			-.81373803
16416667	female	169.2	55.7	Higher s	70933333	low <2 h													-.96484095
16833333	male	169.6	53.9	Higher s	67.2	low <2 h					15850059		-.63908425	.52267606
16.25	male	181.1	58.7	Higher s	70.2						14267712		-.68632148
16083333	female	159	50.5	Higher e	65.5	low <2 h											12802095		-.54173526	.91151458
16416667	male	179.6	75.1	Higher e	82166667	higher >					.5375211		.12889174	13725626
16666667	female	177.1	65	Higher e	71.5	low <2 h											18986793		-.43930693	10341285
15583333	female	168.1	61.4	Lower se	74.1	low <2 h											15732248		-.9523261	-.5447957
15833333	female	179.2	68.2	Lower se	75.4	medium 2											-19164185		-.28533522	24897859
16333333	male	168.1	49.6	Higher s	65066667	low <2 h					-.61943437		-.4940254
12583333	male	159.4	62.4	Lower se	89633333	higher >					-13416444		-1074802	-.34513308
12833333	female	156.4	58.9	Lower se	79.1	higher >											.62351956		-.78981395	-.69675406
12.75	female	152.8	42.6	Lower ed	62.9	higher >											-.75064898		.21771992	-10048183
13083333	male	167.6	72.8	Higher s	95366667	higher >					-10786177		-1059126	23637347
13166667	female	165.5	47	Lower se	62666667	low <2 h											16351395		-.55093315	-.09050486
12916667	male	151	48.1	Lower se	74	medium 2					.06078385		-11819178	-.76844787
13	male	168.9	56.4	Higher s	69466667	medium 2					-.15188011		-10064848	18448407
13	female	163.9	56.1	Lower se	72633333	low <2 h											.47078727		-.28469691	-10192883
12833333	female	156.7	44.2	Higher s	64066667	low <2 h											.37791964		-.56387197	-.7749754
13083333	male	156.4	56.6	Higher s	80333333	higher >					.14922609		-.66251809	-.60850303
13166667	female	169.5	56.7	Lower se	67333333	medium 2											16911567		-.75410041	-.09050486
13583333	male	153.7	44.6	Lower se	64.5						-.22479741		-.76603104	-.19644569
13	female	162.7	49.9	Lower ed	72466667	low <2 h											-.66629409		-.46649806	-.31538067
12583333	male	146	38.6	Higher s	64366667	medium 2					-10307823		-.57317249	.39822868
12.75	female	154.7	45.2	Lower se	62733333	medium 2											.74891597		-.64733293	-.22255478
12.75	female	162.5	48.7	Lower se	67333333	low <2 h											.82625806		-11045942	-12394974
13.25	male	158.9	56.5	Lower se	77366667	medium 2					-17777509		-.41092884	-19345554
12666667	female	170.6	50.6	Lower se	65466667	medium 2													.95127985	.79932716
12833333	male	166.6	70	Lower se	89066667						.52900833		-1372961	12798177
13416667	female	158.2	52.2		65866667	medium 2											-13830356		.33946201	.12943392
13166667	male	150.3	38.4	Lower se	63.7	higher >					-.89611859		.23379263	.38333634
12.5	female	165.5	58.4	Higher s	77966667	medium 2											-.43821043		17420422	.80921468
13166667	male	157.5	47.8	Lower se	68466667	higher >							-.34408857	-.69741522
14166667	male	177.9	55.3	Higher s	66833333	medium 2					10278329		-.74384793	-.00855612
15083333	male	191.5	76.2	Lower se	77533333	medium 2					.4502608		34617095	-.85144934
14.75	male	175.2	71.9	Higher e	87733333	medium 2					-.13163401		-.24046668	.9894084
15083333	male	170.8	61.1	Lower se	71.8	low <2 h							-.91832665
13416667	male	165.4	43.9	Higher s	66	low <2 h					-.94629824		-.20754707	-.22120581
13583333	female	163.7	47.3	Higher s	63.4	low <2 h											.43455245		-10987324	-.03671534
14916667	female	159.4	59.2	Lower se	73766667	medium 2											.84887118		-.55694322	.74501888
14083333	female	153.3	48.2	Lower se	68066667	low <2 h											-.80478141		-.93102828	-.14417633
13.25	male	170.1	60.2	Lower ed	73266667	higher >					-.99697777		.96854578	.56454626
13583333	male	172.2	52.7	Lower se	68566667	higher >					.4069887		.23793535	.34379862
13.25	female	167.5	57.7		74566667	medium 2											-.34770993		-.63725274	-.95557961
13583333	male	158.5	44.3	Lower se	69	low <2 h					-11703014		.76611513	-14119954
13.25	female	153.8	39.4	Higher s	58366667	higher >											-11944533		-.59715597	-14247769
13333333	male	154.6	46.4	Higher s	66.7	higher >					18233412		-13303309	-.53751765
13.5	male	161.2	47.2	Lower se	65866667	low <2 h					-.40881004		-14015961	.36520924
13583333	female	162.4	54.8	Lower se	71766667												.43455245		-.86487513	.82333159
13416667	male	153	40.7	Higher s	65866667	higher >					12999004		-.39731206
13833333	male	157.5	72.3	Lower se	91.5	medium 2					-22911479		.17190013	.48215184
14166667	female	160.3	47.2		64.9												-.38367118		-.19965239
15083333	male	182.2	109.4	Lower se	102.1	medium 2					-.62102178		-.07459636	15114854
13583333	male	177.3	84.4	Lower se	88766667	low <2 h					-.04328805		-10180847	-.19644569
13916667	female	164.8	61.3	Lower se	75.6	low <2 h											-.21394276		-.28542978	.17828685
13666667	male	162.3	42.8	Higher s	62533333	medium 2					-.46313245		16090051	-15683889
13333333	male	164.5	60.5	Lower se	73466667	higher >					-.50634393		.90730523	-.06473903
13.5	female	159.8	76	Lower se	88.2	medium 2											.91938117		-.1103833	-.57915711
14916667	female	167	73.5	Higher s	83766667	low <2 h											-.84335242		21564897	.04151343
14083333	female	161.6	79.9	Lower ed	84.8	low <2 h													-.0652395	14192729
15	male	181.3	85.7	Lower se	85833333	higher >					2556142		.22864431	15328593
15.25	male	180.7	78.3	Lower ed	80966667	higher >							-.79860496	27515224
14.25	female	160.5	66		85.9	higher >											.02496657		.22707839
13.75	male	160.3	81.5	Higher s	97066667	medium 2					.52755879		-.88549576	17190179
14.5	male	169.6	65.8	Lower se	75533333	medium 2					.24909314		17564629	.64851834
14416667	male	172.5	90.9	Lower ed	98333333	higher >					.0570447		-.81122606	17501152
13833333	female	167	89.8		88966667	higher >											.22870919		-.49307648	17467404
13.75	male	178.3	81.3	Higher s	92333333	medium 2					.1359242		-.28797618	.84118835
15833333	male	161.3	46.7	Lower ed	65833333	higher >					18588925		-.53177614	-.57149274
15083333	male	164.5	57.4	Lower ed	71.5	medium 2					.1135018		.0867883	.43128669
13666667	female	160.3	54.3		69.7												.36725608		-10286773	19129845
13916667	female	161.8	43.1	Lower se	58433333	higher >											.58998		-.60610733	15854571
13.5	female	158.9	59.6	Lower ed	70133333	higher >											-.06779711		-.08231933	17665166
15.25	male	176.8	65.9	Lower ed	78166667						-.05279664		-.64995687
15.5	male	168.4	56.8	Lower se	70266667	higher >					-.81326762		28489526	.59444605
15416667	male	150.6	42.3	Lower se	67233333						-.77921781		-.60809657	.00816811
13916667	female	155.5	62.8	Lower se	82566667	higher >											22662512		-11419061	.17828685
14.75	male	163.3	59.1	Lower se							-.50724445		-.05077331	-.02325513
13.75	female	159.3	48.8	Lower ed	62.8	higher >											.84599115		-.46155073	17516765
16166667	male	172.4	64.9	Lower ed	71.8	higher >					22880348		-10995297	-.38702685
14666667	male	174.4	52.8	Lower ed	69933333	higher >							-.34776167	-.74448754
13.75	male	159.3	43.3	Lower se	65833333								25084721	13138658
15	female	167.5	47.7	Lower ed	60866667	higher >													-.81694367	1209151
15583333	male	175.7	65.8	Lower se	76.3	medium 2							-.91028582	-.23717713
15	male	165.8	50.7	Higher s	67066667	medium 2							-.85148936	-11676105
15	male	170	50.6	Higher e	67633333	medium 2							.58113878	-.49249303
15.75	male	185.2	67.9	Higher e	74333333								-.31199622	-.82017857
15666667	male	176	61.7	Higher s	70.7	medium 2							.35943052	-.19105419
15583333	female	154.4	41.8	Lower se	66533333	low <2 h													-.58887605	-.07572239
16083333	male	182.1	65.6	Higher e	73.7	higher >							-.80462395	-.63575549
15.25	male	180.7	72.3	Higher e	81033333	higher >							.07771093	.1184619
15666667	male	175	63	Higher e	69533333	low <2 h							-.62035292	12944454
15333333	male	171.9	50.7	Higher e	67333333	higher >							-.57239731	-19283954
15	male	175	64.4	Higher e	74833333	low <2 h							.407015	-.22244605
14.75	male	160.2	44.6	Higher s	66433333	medium 2							-.99145426	-2183604
15083333	female	173	55.4	Higher e	66.1	low <2 h													.36062364	-20788095
15166667	female	156.4	50.2	Higher s	67.2	medium 2													-10336855	-.91117194
15333333	male	181.4	61.9	Higher s	75.2	medium 2							26214737	-.57808257
14.75	female	167.6	49.2	Higher e	63266667	medium 2													-.87328995	-.96488799
15.25	female	173.5	55.4	Higher s	68633333	medium 2													22228531	-.99424133
14833333	male	182.3	62.5	Higher s	71266667	medium 2							.13154929	-.44970987
15416667	female	182	59.8	Higher e	65266667	low <2 h													.77429733	-16294464
15833333	female	162.9	49.3	Higher s	67.2	low <2 h													-11272376	-.63768825
15.25	male	173.3	52	Higher s	69266667	higher >							-.72498877	-10292824
15	female	172.5	94.7	Higher s	92866667	medium 2													-.46557023	23816703
14916667	female	160	42.8	Higher e	66333333	medium 2													15272298	-14436648
15	male	177.6	62.9	Higher e	71866667	medium 2							.13662768	-.62751652
15083333	male	169.2	47.7	Higher e	63533333	medium 2							17997307	.02621215
15333333	female	164.9	52.3	Higher s	69966667	low <2 h													.48648719	-.21741482
15666667	female	163.4	54.3	Higher e	74233333												.69834001		-.60840991	-.70605837
15.5	male	170	61	Higher s	76	medium 2							10792161	-14311173
15416667	female	164.3	69.7	Higher s	84533333	low <2 h											-.63120883		26235142	.87214295
13.25	female	155.4	39.2	Higher s	60033333	medium 2											.71743005		-.2844011	-.72098095
13	male	167.5	44.3	Higher s	64866667	medium 2					-1278451		13067287	-.78980189
13833333	female	160.6	49.9	Higher e	64633333												-11074966		21151732	-1614926
14416667	female	160.5	55.3	Higher s	70566667	higher >											-10585737		19662846	-21178904
13083333	male	166.5	45.3	Higher s	63166667	medium 2					14253577		-.92881196	10127175
12916667	female	164.7	44.9		62833333	low <2 h											17077422		-.97238475	-13273289
15083333	male	154	41.3	Higher s	63.6	higher >					-.64146686		-.13971648	-20666729
13583333	male	160	40.8	Lower se	62266667	higher >					-.55120526		-.2845803	-12769343
13	female	154.2	40.9	Higher e	60966667	medium 2											.09807068		-.93169512	-14103482
13	male	162.8	52.1	Higher e	68933333	medium 2					-.49559977		.2769025	-.99246671
13.75	female	161.9	45.2	Higher e	65266667														.09298652	-16100921
12833333	female	172	85.1	Higher s	94666667	low <2 h											.51558761		-10117451	-.54031139
13583333	female	167	50.5	Higher s	62633333	medium 2											16963107		-.89561066	-.74039011
12916667	female	166.9	58.9	Higher s	72933333	higher >											-.79023471		.71605943	.31521843
13.5	female	155.3	46.4	Higher e	64433333	higher >											10654403			-.73553535
15416667	female	165.3	51.4	Higher s	67.6	medium 2											-.09251644		-.71950647	-.6913504
15416667	male	175	64.8	Higher e	74133333	low <2 h					.46366091		-.68879455	-1274657
15666667	female	158.1	52.6	Higher e	69966667	low <2 h											26574749		-10386844	.23211749
15.5	male	175	58.6	Higher s	67033333	higher >					16537695		-12228571	.59444605
15.25	female	167.7	60.3	Higher e	69333333	low <2 h											-.59322146		-.54149749	-1150584
15416667	male	185.8	77	Higher e	77.7	higher >	1	healthy	-.34403741	-12862719	19161522	-.11246096	-.87992134	.07568522
15333333	female	167.9	58.4	Higher e	68866667	higher >	1	healthy							-.29954867	.0223862	24063166	-.42173198	-11783034	-.13924193
15.75	male	185.8	69.2	Higher s	75166667	medium 2	1	healthy	.1884648	-.8393114	.67787316	-.20043351	-.44509267	.39527092
15833333	male	184.8	72.8	Higher e	74733333	higher >	1	healthy	-.69991866	-.77982704	17994878	-.12349682	-11661314	-.57149274
15.75	male	174.5	56.6	Higher e	73433333	medium 2	1	healthy	.1884648	.30741414	.91061179	-.22886081	-.16190873	-.41502874
15666667	female	171.2	54.6	Higher e	64866667	low <2 h	1	healthy							1035957	11456813	21311726	10856635	-12057164	.38848013
16166667	female	164.9	64.9	Higher s	74166667	low <2 h	1	healthy							.37272109	-.72195581	-.4787978	-.53523602	-.37148564	.12466858
16333333	male	186.1	63.2	Higher e	73.7	medium 2	1	healthy	26693925	13008427	23600522	19900893	-10605734	-.8351458
15833333	male	188.3	80.7	Higher e	80033333	low <2 h					.81174887		.91817868	-.03127328
16166667	male	181.1	62.1	Higher e	73.3	medium 2	1	healthy	-.13968414	-.18509428	26230793	-.30909877	-.88992905	-.45456611
16166667	male	181	66.9	Higher e	73266667	higher >	1	healthy	.35759311	61655024	.58596841	-.58196513	-.77379898	.01820871
15916667	male	184.5	72	Higher e	75833333	low <2 h	1	healthy	-.01453701	-.46877518	14189926	10936474	.01591255	12304024
13666667	female	160	50.3	Higher e	63.1	low <2 h	1	healthy							-11426077	-11139517	10731873	-.24298527	-12692075	-10579796
13.25	female	158.6	60.7	Lower se	77	medium 2	1	healthy							.90843613	.79153508	-.68762051	.05909297	-.09995592	-.25178362
13166667	male	158	45.8	Lower ed	67.7	low <2 h	1	healthy	-.79288105	-.63534664	-.1430057	-.2275682	.38676119	-1237791
14833333	male	163.6	49.3	Lower se	66166667	medium 2	1	healthy	-.44775133	-.15456781	.47660564	-.71426826	-.89902508	12380648
14833333	male	176.8	57.8	Lower se	67566667	medium 2	1	healthy	-.72361393	-.49061202	-.14891479	-.99564252	-.66686272	.36042195
14583333	male	175.4	62.6	Higher e	74133333	medium 2	1	healthy	-.43313291	-.6193053	-.43623205	-.29671816	-.61077772	.15454521
13	female	157.9	49	Lower se	68233333	medium 2											.63945654		-.87020355	-15667721
13166667	female	167.5	59.9	Higher e	70933333	low <2 h	1	healthy							-.47954535	-.05966478	17751825	-.66679554	-12566721	.06590208
12666667	female	158.7	47	Higher e	61.1	low <2 h	1	healthy							-.31722343	-.31217723	-11704766	-.7158936	-10570621	-19387785
13583333	male	180.7	66.5	Higher s	71466667	medium 2	1	healthy	-.0436837	-.21377475	10254794	-.79194104	-.57061868	.27626808
13666667	male	163.6	62.7	Higher s	76.1	medium 2	1	healthy	-.60063614	-.63513093	.75332778	-.33639549	-1254805	.38991862
13583333	female	161.8	45.1	Higher e	64233333	medium 2	1	at risk							.3281996	.54794474	-.83824328	.17547064	20296101	-.50583186
13583333	female	171.9	58.4	Higher e	66.3	medium 2	1	healthy							.21033624	.84925527	-.44700702	-.69023368	-.40785115	-.19308752
13.25	female	174	69.2	Higher e	82566667		1	healthy							-.30022545	-.7222255	23092262	-.55773745	-.99545063	-.17358406
13.5	male	160.7	55.7	Higher s	75.5	medium 2	1	healthy	-.78430463	-.94093603	.60870139	-10700504	-1429918	-.17505818
12583333	female	172	46.8	Lower se	64.2	medium 2	1	healthy							-.67389196	.01818426	.53712184	-.55870645	-.64179467	-.29104921
13	female	159.6	46.7	Higher s	63033333	medium 2	1										-.64712967		.18584724	.62316289
13	female	155.9	55.6	Higher s	72733333	low <2 h	1	healthy							-.74987656	.32700447	.52335957	-.58073929	-.76058816	-.39359263
13.5	female	158.3	44.6	Higher s	65066667	medium 2	1	healthy							.53214	.66718307	.56328619	.10698441	1696402	-.81372448
13.25	male	175.3	59.4	Higher e	72.3						10016415		-12380471	.22682982
13.25	female	164.9	57.4	Higher e	70.2	medium 2											10324899		-.82169792	-.64278139
13333333	female	153.1	44.6	Higher e	69566667	low <2 h											-.3898179		-.39211478	-.41304738
13333333	male	172.9	52.1	Higher e	68133333	low <2 h							.38896672	-12804555
12.75	male	153.1	39.3	Higher e	64066667	medium 2					.05231193		.71563535	.55806116
13166667	female	163.5	50.2	Higher s	59666667	medium 2											20692729		-12940976	-.7943361
12583333	female	163	50.2	Higher e	66933333	medium 2											.84284596		-.86911969	-.29104921
12833333	female	163.5	52.3	Higher e	68433333	medium 2											.41195485		-.93286598	-.7749754
13083333	female	152.5	42.9	Higher e	63666667	low <2 h											14450671		-13521737	.30541307
13083333	female	163.4	51.3	Higher e	64333333	low <2 h											.84898644		-.9805716	-.08562497
13166667	female	174.6	49.6	Higher e	65.2	low <2 h											10286296		-1002713	.76973332
13.5	female	149.2	44.4	Higher e	64233333	medium 2											-.00314005		-.2092754	-.34458974
13	female	158.6	40.7	Higher s	60.9	low <2 h											-.87022947		21696186	.07567915
12833333	female	163.8	52.2	Higher e	65633333	low <2 h											-.71238959		-.72163028	-.61853273
13083333	male	160.8	55.7	Higher s	77033333	medium 2					-.33544172		.5216398	.13455639
12916667	male	160.7	45.2	Higher e	64133333	higher >					.4303284		-.86600889	-.29553332
13333333	male	166.4	52.9	Higher e	68.6	low <2 h					-.96965128		.86481846	-.74013706
13416667	female	152.1	42.9	Higher e	60833333	low <2 h	1	healthy							-.20698158	-.74943892	18768378	-.67935553	-.15769208	-.33972036
13.25	male	154.8	38.8	Higher e	64066667	low <2 h					.50368909		.43318499	-.65123293
14.25	male	172.5	51.1	Higher e	68.4	low <2 h					-1554765		13921616	-.16497502
13916667	female	153.2	42.3	Higher e	62.1	low <2 h	1	healthy							-11941252	-.58252081	15091478	-.3228139	-11913439	-.91617891
14166667	female	156.2	41.4	Higher e	60233333	low <2 h	1	healthy							.40356218	-10069046	-.49606556	-.49798534	.66344765	-.30539786
14166667	male	171	55.8	Higher e	69466667	low <2 h	1	healthy	-.18812116	.8435848	12438297	-.31389347	-10043413	-.27861958
14583333	male	170.3	52.8	Higher e	68.1	low <2 h	1	healthy	-10124374	-.49542939	.11278283	-.37352872	-.3248203	-.58807942
14.75	male	165.6	46.4	Higher e	66.3		1	healthy	-.58080391	-1145261	.77905116	-.20764491	-.78689685	-12384514
14	male	177.2	65.4	Higher e	72666667	low <2 h	1	healthy	-.09561867	-.46001631	.61600658	-.49433361	-10094661	11145313
14166667	male	158.5	39.4	Higher e	60933333	low <2 h	1	healthy	-1098605	-.69670111	17583081	-.68616504	-.92506073	-.81874651
14833333	female	169.8	54	Higher e	71433333	medium 2	1	healthy							-.57874954	-.87413808	.76552507	-.26680696	-.43589239	-.73527275
14083333	male	165	54.4	Higher e	71033333	medium 2	1	healthy	-.65232569	-.03572196	-.05539351	-.99837771	.10729805	-14725476
14833333	male	168.2	52.8	Higher e	70.7	low <2 h	1		14832869	-.0051708		.44806614	-10887187	.69797687
14916667	male	168.1	45.4	Higher e	65133333	low <2 h	1	healthy	-.9216094	-.43866898	17129632	-.85263587	-11527196	.00147822
14	female	169.7	52.6	Higher e	65366667	low <2 h	1	healthy							-.80877118	.51636761	-.156422	-.07908616	-10130811	.72061911
14.5	male	159.2	51.2	Higher e	69333333	low <2 h	1	healthy	-.20757747	-.68254313	.90644689	-.37784513	-.75063791	-.76923032
13916667	male	164.2	48.9	Higher e	64.9	low <2 h	1	healthy	-.94623405	-.18461088	.21929211	-.61401722	-.73311436	.86587069
14083333	male	164.7	53	Higher e	68833333	low <2 h					-.21963549		.14977074	-.59482179
16666667	male	170.5	59.2	Higher e	71033333	medium 2					.1564082		-.6851598	-1258787
16.25	female	170.4	58.7	Higher e	70866667	medium 2											.23871481		.4270112	.43260853
16333333	male	186.3	68.9	Higher e	74166667	low <2 h					10111834		-.91327091	-.70005307
16916667	male	180.1	67.5	Higher e	74266667	medium 2					19510433		-10475284	-.44477994
16.5	male	179.6	76	Higher e	77.3	low <2 h					12274255		-12086036	-.33761438
16583333	male	169.6	68.8	Higher e	80	low <2 h					.89740606		-.89306545	10596894
16	male	178.5	72.6	Higher e	72433333	low <2 h					.17762815		-.06792889	-14922593
16.5	male	193.5	71.2	Higher s	75933333	medium 2					-.06860256		.70938628	-.67538573
15916667	male	161	55	Higher e	68.7	low <2 h					.25825245		-.50518557	-11331508
16666667	male	188.8	61.4	Higher e	68433333	higher >					-.17540411		-.84383233	-17317278
15.5	male	189.4	72.2	Higher s	72266667	medium 2					.23734661		-.33515725	-.5533732
15916667	male	177.5	63.2	Higher e	69233333	low <2 h					.23073529		-.58165105	-17409217
15833333	male	174.2	67.2	Higher e	75933333	medium 2					.41614552		-.36185956	-.63902017
16.75	male	180.9	77	Higher e	75.1	low <2 h					-.28184123		.09233225	19629652
16333333	male	178.1	61.7	Higher e	71433333	low <2 h					-.13590408		-.12010374	-1240424
16416667	male	185.6	69.1	Higher e	72.6	medium 2					-.10343502		-.7677217	.62951015
16583333	female	165.1	62.5	Higher e	74766667												.37667456		-.36493622	-.36906004
16833333	male	179.5	69.7	Higher e	78833333	medium 2					.12745985		-.29477302	.18481374
17.25	female	166	61.4	Higher e	71	low <2 h											.34233641		-.14955203	17048844
16333333	male	182.1	71.8	Higher e	77.6	higher >					.04411831		-.30423183	-.29477486
16666667	female	169	55.8	Higher e	70466667	higher >											.43555747		-.72410201	.17362393
16916667	female	172.2	59.9	Higher s	72933333	medium 2											-.08409238		-.06602938	.9414421
17416667	female	177.5	63.5	Higher s	70833333	medium 2											.45296162		-.16725254	.28630923
17	male	186.3	66.8	Higher s	71.2	medium 2					.22101418		-10238118	.27718432
16416667	female	157.9	52.9	Higher s	69.6	low <2 h											.70803374		-11814045	-17670816
17333333	male	172.4	61.1	Higher s	73.5	medium 2					-.65440602		-.07836488	-.75487717
17166667	male	177.1	73.3	Higher s	81	low <2 h					.72818963		-.50014039	-.91469579
15.25	male	182.5	66.1	Higher e	69366667	medium 2					.61348276		-.36681765	.05094753
14333333	male	163.6	45.3	Higher e	65.2	higher >					-.4518459		.16162463	-.32138882
14.75	female	161.7	58.1	Higher e	71366667	medium 2											-.49897486		-.14383664	.28577696
14916667	female	164.3	48.6	Higher e	61033333	low <2 h											-.33504323		-.98713791	-.97466112
14.75	male	172.9	56.5	Higher e	70.3	medium 2					-.22027646		-.10173571	-.02325513
14166667	female	169.5	47.4	Higher e	63066667	low <2 h											11862702		-11242116	-.61808169
15	female	147.8	47	Higher s	64333333	low <2 h											-.4667839		-.63257282	-.04153637
14.5	female	166.6	56.5	Higher e	67.7	low <2 h											.42466425		-.87087368	.61309404
14333333	male	160.6	47.3	Higher e	66.8	higher >					-.2740975		.32301157	-.6589561
14.25	male	169.7	48	Higher e	66.5	medium 2					-.0517994		-.96639109	-.57006239
14083333	female	167.5	53.3	Higher e	67233333	medium 2											17146031		-11020483	-10822459
14.25	male	168.9	50.7	Higher s	70466667	medium 2					.5475622		-.357641	-.16497502
14916667	female	170	62.1	Higher e	69366667	low <2 h											15915685		-1486805	.19784797
14916667	female	148	40.1		62933333	medium 2	1	healthy							-.45859091	.53509633	.66266104	-.3954066	-.89896136	-21471702
14833333	female	165.3	65.8	Higher e	76833333	medium 2	1	healthy							-.43150234	-.69093058	-12623848	-.68952607	-.81798834	-.73527275
15	female	155.9	52.1	Lower se	66966667	medium 2	1	healthy							-10747135	.10671049	.86571516	-.46996734	-10494113	17563267
14.25	male	170.4	49.7	Higher e	67133333	low <2 h	1	healthy	-.88270853	-.01334623	18378417	-.01551407	-11277806	-13802371
14666667	male	168	57.8	Higher e	69066667	higher >	1		-.13455804	-.41872493	.62394306		-1051327	19559531
13166667	male	155.1	47.2	Higher s	70433333	medium 2	1	healthy	-.54423758	.02359811	16152714	-.80769733	-11599209	-.62986825
13.75	male	158.1	40.7	Lower se	61766667	medium 2	1	healthy	-.05342145	-113505	22634345	.21701878	-.80620406	-.71189479
13916667	male	172.5	49.7		63.2	higher >	1	healthy	-.53229178	15576122	11227734	-.67450422	-11663588	-.75463244
15166667	male	172.5	72.4	Higher s	80333333	medium 2	1	healthy	-.16381034	-.52246313	18957344	.2030193	-12683029	.40990274
15.75	male	179.7	61.5	Higher s	70333333	higher >	1	healthy	-.25324645	-.48355148	.31995204	-.10033313	-.22137736	-14954283
15666667	female	160	64.4	Lower ed	80.6	higher >	1	healthy							-.43750075	-.63064526	1277311	-.53335654	-.53224331	-.39333308
14583333	female	165.3	50.9	Lower se	64.8	higher >	1	healthy							-.20302214	.61231395	.52794864	.22031431	-12804917	-.87695901
15333333	male	150.7	37.9	Higher e	62.2	higher >	1	healthy	-.39432592	-.52608508	12814968	-.12188847	-1294416	-.71311385
15333333	male	179.6	65.7	Higher s		higher >	1	healthy	-.86341967	-.62521391	.52098317	.01560012	-.88102492
13583333	female	160.7	68.5	Higher s	77866667	higher >	1	healthy							-.55577559	.34800844	18363161	-.65763515	-.64037213	-.19308752
13333333	female	163.6	57.2	Higher e		medium 2	1	healthy							-.62204355	-.9521351	13801121	-.29371545	-.63802997
14.5	male	170.2	50.9	Higher s	66166667	medium 2	1	healthy	.84070267	18363029	12871073	-.28054272	-.81009485	-.16162375
14333333	female	158.9	49.5	Lower se	67.9	higher >											13121828		-10429588	-10186706
13583333	female	176.3	63.2	Lower se	75.3	medium 2											11713352		-.58157372	-.34945969
13.5	female	169.5	70	Higher s	80.1	medium 2											15384551		-.82935556	-.26640061
15916667	female	155.9	50.9	Lower se	68666667	medium 2											25220529		-11013627	-.25164732
13.75	male	154.5	39.5	Higher s	60433333	higher >					.87255753		.67768344	-15897244
14.75	female	166.4	54.3	Lower se	69.2	higher >											.17872088		130171	-.41772207
15666667	female	162.4	49.9	Lower ed	66533333	higher >											18874276		-.86363484	-.39333308
14416667	female	154	37		59366667	higher >											22174577		-11827005	-10235418
13583333	female	162.1	47.7	Higher s	67	medium 2											15003031		-.80607672	.66695942
15666667	female	159.3	44.1	Higher s	64966667	higher >											.16677443		-.74069927	-16442342
14.75	male	165.7	46.4		65266667	higher >					.78033826		-11351399	-.69836415
16083333	female	171	54.8	Higher s	67166667												17862843		-.98011609	-15907829
16	female	161	57.7	Higher s	72.3												.94737332		-.90709412	.2126178
16.75	female	153.7	65		80.8	low <2 h											.23538258		-.30509224	-.45711448
16666667	female	163.2	58.6	Lower ed	73533333	higher >											.64252037		-10236048	-.92156376
17.25	female	161.3	85.9	Lower ed	97.7	medium 2											17031037		-10458731	.68738239
16.25	female	171.8	76.9	Lower se	81966667	higher >											14608971		-11689631	-.03661862
16583333	female	168.8	72.2	Lower se	83.6	higher >	1	healthy							-.35302706	.69829393	-.30072365	-.44715418	-.08149697	-.05616957
15916667	female	157.7	70.1	Lower ed	80266667	low <2 h	1	healthy							.3654271	.57547955	.98170469	-.0577276	-.16855048	.21749237
15916667	male	175.2	68.8	Higher s	77833333	higher >	1				.21607994		.51718628	-14708013
14916667	male	165.1	58.1	Higher s	71333333		1	healthy	-.20435061	-.76531529	-.5129558	-.23789749	-10507942	-.06603304
16166667	male	171.8	111.8	Higher s	11073333	medium 2					-12536744		.06743597	-.04933055
15916667	male	176.1	67.8		75.6	higher >	1	at risk	27192502	11620729	-17155791	.80238474	.45204902	-1268211
16.75	male	172.7	86.4		85233333	medium 2	1	healthy	-.47838259	-.09879756	-.8576429	-.05326749	.03282595	.00350437
14.25	male	175.5	83.7				1	healthy	-.24816116	-12781315	-15196365	-.17978746	.33605095
15333333	male	158.3	55	Lower ed		higher >	1	healthy	-.47710717	.39264935	.28465191	-.63264882	-13283934
14.25	male	172.2	55	Higher e	67.6	higher >	1	healthy	24003844	.44577473	-12926967	-.73119344	13496906	-13127226
16.75	male	179.2	70.7	Higher s	77533333	higher >					-.05086235		-.31571098	-.87487464
14833333	male	164.7	76.3		90433333	higher >	1	healthy	-.64085515	-.90625928	12929688	.72031738	-.8650501	13730867
14916667	male	173.8	87.6								12448048		-10196504
14.75	male	173	60.5	Higher s	70	higher >					19772733		-108984	-.90089686
16333333	male	175.2	84.7	Lower ed	90433333	higher >					-.42602225		.72405275	-.6325067
15416667	male	167.6	67.9	Higher s	87066667	higher >					.15270411		-.7949761	-1274657
16416667	male	173.3	84.3		92433333	higher >					.87471824		-.86687327	.96726125
15083333	male	184.3	68.1	Lower se	75.1	low <2 h					.51842914		-.83904998	-.58139965
15666667	male	166.5	80.1	Lower ed	88966667						-.81915056		.17395128	-.19105419
16.25	male	170.8	50.9	Lower se	65966667	higher >					-11038137		-.07023398	-14891289
17.25	male	168.9	74.8		84533333	higher >					.90676221		-.50756444	.21300308
16.5	male	171.2	53.2	Lower se							1703403		-12454336
17166667	male	168.7	50.9		71066667						-.78938296		-.67022458	-.98228964
16083333	male	173.7	58.3	Lower ed	70.8	low <2 h					.10988631		.12578789	-11085075
15.75	male	172.5	77.5	Lower ed	83566667	higher >					13800326		-12748216	.12517104
17416667	male	177.9	83.2		91.5	higher >					-.90589336		.73086955	.84632018
14583333	female	175.8	52.9	Higher e	65933333	medium 2											-.39982619		-.02999854	-16586262
15.25	female	169.4	58	Higher s	71366667	medium 2													.9388797	-1150584
15416667	female	167	58	Higher s	69.3	medium 2											-11447242		.42422882	.32492028
15583333	female	171.2	54.6	Higher s	66266667	higher >											-.19960841		-1202198	-12484057
15	female	154.4	46	Higher e	64233333	low <2 h											15199257		-.90779308	14436548
14.5	female	163.6	55.9	Higher e	69566667	low <2 h	1	healthy							.2657775	.18292218	.35149603	-.33575882	-.66245712	.45675978
15.25	male	177.6	71.6	Higher e	80.2	medium 2	1	healthy	-11895912	-.96239661	.05271582	-.4800502	-12218981	.18597627
16.5	female	153.9	59.1	Higher e	75466667	medium 2	1	healthy							-.70949959	-.35126844	.0819067	-.46337063	-12384333	-.98989395
14666667	female	162	52.4	Higher s	71933333	higher >	1	healthy							.71225286	.33791219	12282309	-.05130926	.25776897	.91599122
15166667	male	166	53.7	Higher e	66.3	higher >	1	healthy	15743749	-.04458131	15204593	.30246655	-.96534876	-.94036321
14.75	female	157.6	49.4	Lower ed	65.3	low <2 h	1	healthy							.65573867	-.34446914	-15114466	.22949528	19109238	-.96488799
14.5	female	163.3	58.8	Higher s	67233333	low <2 h	1	healthy							-.44098457	.98817542	-1062496	-.05932452	-.52351274	-.71574718
16416667	female	169.2	77.3	Lower se	82033333	medium 2	1	healthy							-.41666532	-.8516578	-10565643	-.03635588	.44683264	13614437
15083333	female	165.9	55.2	Higher e	71366667	low <2 h	1	healthy							-.63059675	-.37215184	.26133007	-.28707013	-10876403	-.98444546
15333333	female	166.8	54.9	Higher s	67133333	medium 2	1								-11243817	-14392365	.6494121	-.3970604		-.68645214
15416667	female	168.1	67.5	Higher s	76.1	medium 2	1	healthy							-.3561185	.00105438	-.76902905	-.20264775	21291426	-.22230239
16	female	166.4	78.3	Higher s	85266667	medium 2	1								.9575333	-.23871128	.03070831	.02050796		16982898
15.25	female	176.3	57.7	Higher e	67333333	low <2 h	1	healthy							-.09570871	-.01847794	.64437873	-.18273252	-11961769	-10724127
14.5	male	169.3	63.8	Higher s	75733333	medium 2	1	healthy	-.15240483	-11424787	.13144192	17561024	-.08811777	.78354202
16	male	167.3	57.5	Higher s	73366667	higher >	1	healthy	-11793685	-12041082	-.8567597	-.37952339	10139621	-.8169298
14416667	female	164.4	50	Lower se	64.4	low <2 h											-.79512179		21252703	-11798773
16.25	female	166.2	46.6	Higher e	62	low <2 h	1	healthy							-.50976833	.54125878	-13148488	.13728305	11407887	-16007091
16.5	female	166.3	61.4	Higher e	70.8	low <2 h	1	healthy							.29396062	-.02194325	10199578	-.21682639	-11341556	-.36415183
16.25	female	166.3	54.8	Higher e	67833333	low <2 h											-1043386		.30671163	-.97507292
16083333	female	171.9	55.6	Higher e	67966667	medium 2	1	healthy							.98953911	.33260493	.23875109	-.47160333	-.52569694	.67692419
15666667	female	163.8	49.1	Higher e	67433333	low <2 h	1	healthy							-11742296	-1603988	-.62006077	-.2444452	-11389036	-1096965
16666667	female	168.7	48.8	Higher e	65166667	low <2 h	1	healthy							.23978897	-.64700682	-.37312469	.66169153	.30009062	-.45219761
16.5	female	176.4	55	Higher e	64.4	low <2 h											-12615779		-.58068195	.80911464
16666667	male	180.7	68	Higher e	75466667	medium 2					-.37315349		-.42731693	-.1777795
16666667	female	156.9	50.7	Higher s	67.3	medium 2											.66060594		-12161423	-.99979145
16.5	female	168.8	55.1	Higher e	67066667	low <2 h											-.00306167		-.9122314	-16156361
16583333	female	158	51.5	Higher e	70266667	low <2 h											-.93779755		.13509341	-15423993
16.5	female	165.3	53.7	Higher e	68.8	low <2 h											-11218866		22909641	-13809828
16583333	female	175.4	71	Higher s	75633333	low <2 h											-.90327289		.7206896	10389471
16.5	female	169	53.4	Higher e	63.1	low <2 h											-16584135			-.44236959
16583333	female	169.2	57.5	Higher e	69.5	low <2 h											-11904783		21378859	-16988446
16333333	female	163.5	56.4	Higher e	65.6	low <2 h											-.312428		16105742	.1149121
16	female	172.5	55.6	Higher e	66933333	low <2 h											-15171733		24073395	-.6475081
16666667	female	168.1	56.6	Higher s	64.2	low <2 h											.61322425		-.37379069	-.37396992
16583333	female	160.9	46.1	Higher e	62433333	low <2 h											20947615		-.69650667	-10730636
16583333	female	165.9	53.5	Higher s	65633333												-13621881		31887503	-10730636
16.5	female	155.6	46.6	Higher s	64966667	low <2 h											21321864		-.64485281	.33980805
16416667	female	179.6	64.9	Higher e	76.8	medium 2											.24030724		12729825	.34467295
16166667	female	168.6	70.3	Higher s	73833333	low <2 h											.55664676			-.50093583
15.25	female	162.9	55	Higher e	70566667	medium 2											-.55405729		16229529	.49101388
14083333	female	163.1	54.2	Higher e	70.1	low <2 h											.98260198			-12385908
14416667	female	163	59.9	Higher s	75166667	medium 2											17344453		-11292599	-12580451
15666667	female	159.2	49.8	Higher s	65366667	low <2 h											-.18520818		-.08593375	-16442342
14	female	166.4	55.5	Higher s	66.6	low <2 h											.51756593		13785795	-.29564528
14	female	153.7	46	Higher s	66033333	medium 2											.50056072			-.92103875
15583333	female	166	51	Higher e	67.7	medium 2											-10534641		-.82805825	-.70115347
14.5	female	163.6	57.1	Higher e	69633333	low <2 h											-.53646065		10449555	.61309404
14666667	female	166.6	59.7	Higher e	72.8	low <2 h											-.88707421		.89904615	-.25650674
15.25	female	170.4	61.3	Lower se	72.9	higher >											-.13332889		.85871487	-.75972735
14833333	female	156	57.3	Higher s	70666667	low <2 h											-.25867436		-.3904684	-.57893914
14333333	female	150.5	49.8	Higher s	64633333	medium 2											.55259367		16531462	-14876823
14583333	female	172.5	65.5	Higher e	79233333	higher >													-11869719	-.40795868
14.25	female	159.5	39.3	Higher e	61566667	low <2 h											18144977		.26983187	-10138022
15333333	female	158.2	48.5	Higher e	65366667	medium 2											-.34101115			-11554895
14916667	female	167	51.9	Higher e	68366667	low <2 h											.67600874		-11153947	-11309957
14166667	female	165	78.1	Higher e	88433333	medium 2											.06578999			11016794
13666667	female	165	48.8	Higher e	64466667	low <2 h											-.90286599		-.79081961	-11361629
13916667	male	174.8	59.7	Higher e	73866667	low <2 h					12127227		-.35083987	-.41702762
13166667	male	156.6	41.8	Higher e	65933333	medium 2							1185597	-1305338
13083333	male	171.6	56.2	Higher e	69333333	medium 2	1		-.23550188	.73175258		-.33863249	-.86365495	.33720896
13833333	male	168.5	53.1	Higher e	70.3	low <2 h	1	healthy	.07970333	.59572778	-.20204408	-.35099222	-.55019624	-11384016
13583333	male	170	60	Lower se	71333333	low <2 h	1	healthy	.34281907	.50526326	-.60468497	-.57225692	-.09766413	-.60162891
13166667	female	165	50.3	Higher e	65633333	low <2 h	1								-.53851254	-11169476		-.55605689	-.10182656	.37871597
13.25	female	167	58.1	Higher e	68.2	low <2 h	1	healthy							-.329705	-11658964	-.10979447	-.41500532	-.26836239	.37381282
14	female	162.1	48.3	Higher s	65.4	low <2 h	1	healthy							-.6025915	.23355025	.21873075	-.20725318	-.23011286	-.92103875
14.25	female	170.9	60.3	Higher e	70.2	low <2 h	1								.19977006	.95930116		.57020531	-.39819129	.47142156
13166667	male	178.6	65.9	Higher e	72066667	low <2 h	1	healthy	1886943	15123251	-.83679431	-.06036765	10694542	-.69741522
13.5	male	160.1	44.4	Higher e	63966667	medium 2	1	at risk	13693357	-.41288219	-.60780803	.68735872	.15044074	.97301009
13666667	female	165	43.1	Higher e	64766667	low <2 h	1	healthy							.30108072	13443842	21159403	-.7687431	-12317917	-10579796
13.25	female	153.7	38.8	Higher e	59266667		1	healthy							.37780422	-.02883621	-.97883685	-.37097675	-.02911828	-.40818273
13.25	female	162.1	40.9	Higher e	61233333	medium 2	1	healthy							-.5655414	-12761252	-.1834872	-.00362214	.12191291	-.25178362
13.75	male	174.9	53.9	Higher e	64833333	low <2 h	1	healthy	-.60544622	17276493	-.87072641	-10571913	-.05293293	-21299272
12833333	male	161.7	43.8	Higher e	64233333	medium 2	1	at risk	11337341	.77990951	-13829228	-.56570423	20087634	-12200392
13416667	female	157.8	45.7	Higher e	61.1	low <2 h	1	healthy							.05826823	.6815918	-.49321218	-.4973191	-.25658832	-14344137
13166667	male	168	50.2	Higher e	69.4	low <2 h	1	healthy	.72660682	-.30392183	-.55994766	-.42216474	.61054852	-.96760312
13.5	female	155.2	37.4	Higher e	59433333	low <2 h	1	healthy							.53214	-16505324	-.5658959	-.57177272	.77697279	.20273413
13.5	male	158.4	40.9	Higher e	63866667	medium 2	1	at risk	.59623404	15595816	-15100373	-.00411163	25776225	-.7153256
14	male	167.2	54.9	Higher e	69.7	medium 2	1	healthy	-.06802468	-.59399598	-.77919646	.16138381	.55639962	-10460789
14	male	162.6	53.7	Higher e	67.9	higher >	1	healthy	-.37155855	.10669192	.14313999	-.21663679	-.38368614	-11135979
14.5	male	161.6	38.6	Higher e	60966667	higher >	1	healthy	.50966684	-.15001153	.74525059	.03697799	-.33443936	-17819079
13.5	male	160.7	57.4	Higher s	78.8	medium 2	1	healthy	15350003	.66542011	-.17769914	-.34807528	-.322534	.16260896
15916667	male	172.5	55	Higher s	72.3	medium 2					-.37871734		-.74307819	-.39031983
14166667	male	182.5	59.1	Higher e	70333333	higher >					.45536285		.74832625	-.14358785
14166667	male	163.4	60.7	Higher e	82.7	higher >					-.46777687		-.56263513	-.54868305
14166667	female	151	40.3	Higher e	62.7	higher >											.46189772		-.49091524	-.22722691
13.5	female	164	48.5	Higher e	65733333	low <2 h											.30705267		-.40973235	-13610483
13583333	male	174.7	54.3	Higher e	66133333	medium 2					.0634229		-.67540502	-.73668999
14	female	155.8	49.5	Higher e	70233333	low <2 h											17138017		-.41182562	-.37381946
13	male	156.4	40.3	Higher e	61.7	higher >					.13385844		-10234833	-.51958214
13.5	male	170.1	45.8	Higher e	65.7	higher >					14467003		-.40183515	.77040981
13416667	female	167	62.2	Higher e	74366667	medium 2											-.87638439		-.32608298	.28581869
13083333	female	167.5	60.4	Higher s	71	low <2 h											.70019014		-.42450522	-.71128582
14583333	male	178.6	75.5	Higher e	81633333	higher >					.41348169		-.05301919	13697491
13833333	male	181.5	68.2	Higher s	73866667	medium 2					-.50443344		.15774138	-.93583241
14	female	164.2	53.4	Higher s	67366667	medium 2													.9697258	-15464322
13416667	female	153	48	Lower se	68	higher >											.32726875		-.57466002	-.49610512
13.25	female	162	41	Higher s	61	medium 2											-.65176128		.02033441	.68661104
13	female	155	65	Lower ed	88166667	higher >											-.62618762		-.74722042	.77958682
13.75	female	168	64	Higher s	88466667	higher >											-.70729864		-.58047559	-.0464788
13583333	male	157	70	Higher e	93833333	higher >					.85095433		-.92745864	.54639023
13.5	male	172	62	Lower ed	72533333	higher >					-.30686463		-.49529722	.70287638
13.5	male	158	88	Higher s	98833333	higher >					1068348		-.46697538	-.10752475
13666667	male	166	61	Higher e	75433333	medium 2					16616457		-.97727383	.99766924
13333333	male	163	93		11013333	higher >					.11371863		.43995084	.47557939
13333333	male	148	59	Lower ed	86	low <2 h					-.45551698		.22751702	-.26735844
13666667	female	168	59	Lower se	76	medium 2											-.7495605		.69779517	-.43251352
13666667	female	152	59	Higher s	80.9	medium 2											-11020964		.43053937	.89660202
15083333	male	160	66	Higher e	72.5						10848713		-.09441553	.09372458
14	female	152	54	Higher e	70.5	low <2 h											-.33155325		13598738	.40792237
13333333	male	167	52	Lower ed	67.5	higher >					-.47708308		-.82615469	-.53751765
12583333	male	168	76	Higher s	85	medium 2					.68751774		-.61001533	2831049
12.75	male	148	44	Lower se	69	higher >					.12796847		.45777342	-.3203278
13	female	157	48	Lower ed	62.5	low <2 h											.49018901		-.2953911	17963423
12583333	female	148	41		64066667												-.23373514		.30494718	.10013602
12583333	female	160	48	Higher s	66	medium 2											.09857428		.87459694	-.21281217
12666667	female	158	48	Lower ed	65.5	medium 2											-.39845311		.77745532	.40816921
12583333	male	157	65	Higher s	83.5						-.8011105		14475157	.53338537
12666667	female	152	42		61.5												-.00914927		-.31630213	-.06122032
12.75	female	164	71	Higher s	73	medium 2											-.98233038		12472264	21242358
12666667	female	164	45	Higher s	66.1	medium 2													11358013	14251799
12833333	male	157	88		11126667						.2690821		-.59801201	.4014896
14416667	female	165	53		71.9	higher >											-.52258193		-.45056478	-14925483
13166667	female	151	51	Lower ed	81733333	higher >											.25845557		-.50014133	10043437
12.5	female	140	48	Lower ed	82133333												-.87157314		29215443	-.75563981
12583333	female	148	41	Lower se	64066667	higher >											.67262843		-.64179467	.10013602
12583333	female	163	86	Higher s	98066667	medium 2											.62156317		-.14702845	-.4475233
12.75	female	148	62		87												-.10315476		-12316113	-.06610208
14.5	male	181	120	Higher e	10883333	higher >					14774376		-11696677	22688025
14.5	female	157	49	Lower se	62	medium 2											.3672689		-.79605748	-.32491153
14.75	female	156	52	Higher e	67.5	medium 2											.96994909		-.55799511	-.26138895
14.25	female	164	68	Lower ed	75.5	medium 2											.14448253		-.33138897	-.54478417
15	male	169	90	Higher s	85	higher >					-.0167811		.02337644	-11000987
14333333	male	156	60		81.5						.58124639		-.66229814	.21871884
14583333	female	159	47	Higher e	63	medium 2											-.44831685		.6567039	1937043
14333333	male	160	53		67.5								-11974232
14916667	female	160	52	Higher e	64.7	higher >											12103108		-.67451195	-14436648
14166667	male	172	69	Higher s	73	higher >					10576102		-12251944	-.27861958
14833333	female	155	48	Higher e	62	low <2 h											20345499		-10397643	22350659
15083333	male	166	71	Higher s	80.5	higher >					-.00247561		-.42284745	-.58139965
14.5	male	180	73	Higher e	75.5	higher >					.90858304		-.94599642	-.09411191
14.25	male	167	71	Lower se	86	higher >					13656844		-11221179	-.57006239
15	male	163	68	Higher e	85866667	higher >					.07986553		-.40980954	.85774188
14833333	male	160	59	Higher s	69	higher >					.67424513		-.75746266	-.17966593
14.25	female	149	51	Higher s	88066667	medium 2											13832844		-12185237	-.07576614
14083333	female	158	55	Higher s	71.3	medium 2											.24045175		-.98714422	.01216859
14.25	male	179	66	Higher e	74233333	higher >					14132691		-.98054807	19279764
15	female	161	51	Higher e	74433333	medium 2											.53633679		-.0954925	.66197525
14.25	female	175	58	Higher e	64533333	low <2 h											-.22400825		-.04814715	-.54478417
14083333	male	168	69	Higher e	89833333	higher >					16041668		-12716486	.62049081
14083333	female	158	57	Higher e	69933333	higher >											.24045175		-.15342169	18883077
15	male	172	70	Higher e	79933333	low <2 h					-.63531956		-.88263345	.04760094
15	male	174	72	Higher e	84766667	medium 2					-.67769505		27414061	11277889
14416667	female	158	53	Higher s	78033333	medium 2											.67314713		-1236141	-12580451
15916667	male	165	65	Lower ed	81.7	higher >					.28489771		.10370625	-.39031983
14083333	male	151	51	Higher e	73	higher >					.19350327		-.34008096	-.59482179
14166667	female	168	54	Higher e	72366667	low <2 h											.42306064		-.33860347	-.14905595
14583333	male	169	74	Higher s	76.4	higher >					-.24975568		-1284618	-.25052277
14083333	female	158	54	Higher e	73	medium 2											-.41313502		.71503928	.55937582
13	male	159	43	Higher e	61.5	higher >					12291496		-14767768	-.04669757
12916667	male	169	62	Lower ed	72.5	medium 2					14948029		-1339164	-.29553332
13	male	170	65	Higher e	78	medium 2							15687891	.35863207
13	female	159	61		71.5												-.42551198		-.09487513
12.75	female	153	46	Higher e	60	low <2 h											.3087213		.65893698	-12394974
12833333	male	145	57	Higher e	79.5	medium 2					14364471		-1244039	-10849118
12.75	male	155	41	Lower ed	62	higher >					-.23828041		-.46316204	-11987168
12.5	female	157	71	Higher s	84	low <2 h	1	healthy							.65221031	1154794	-.01275904	-.60529732	.08913436	15916419
12916667	female	165	55		67		1	healthy							-.57539324	-.28293889	-.8454617	.05977877	-.74913045	2427065
12583333	male	160	67		79		1	at risk	.81714173	20002287	-.69449216	.77699941	30317579
12583333	male	142	50	Higher s	76.5		1	at risk	.40216057	.7392654	-.54576633	.98554094	17252541	-.14239805
13	male	149	47		72		1				-.7603948		17132764
15416667	female	154	50	Lower se	67166667		1	at risk							.17417339	-.7741149	-114817	.44456222	27277331	1575715
16.25	female	156	64	Lower ed			1	healthy							-.89323733	.69159059	.70015042	-.02426536	-.22795313	184029
15.25	female	165	63	Higher s	80666667	low <2 h	1	at risk							.25776602	.23422553	-.9555258	14138533	28788686	.5691852
15083333	male	166	66	Lower se	83.5		1	healthy	-.10375293	-.74790768	.77045871	-.2293499	-.14254779	11064109
15916667	female	149	47	Higher s	67.1	low <2 h	1	at risk							18689003	157499	-12375928	.76783475	3338182	12339617
15166667	female	163	50	Lower se	69.6	medium 2	1	at risk							.43210135	-.43855843	-.91682635	.36158719	21394493	.80856772
15.25	female	157	55	Higher s			1								-.65537702	-.34474065	-.81857204		.78656652	21326117
15166667	female	158	58	Higher s	76466667	medium 2											-10020263		17038948	-.20764208
15666667	female	159	53	Higher s	69333333	higher >	1	healthy							-.76166145	.16446111	.34114334	-.06670192	10258314	.93574938
15416667	male	170	64	Higher s	75	medium 2	1	at risk	-.12327034	.24429882	-.94774252	.31906805	13484755	.81837345
16083333	female	160	60		82166667	low <2 h											10829179		-10576347	.2859402
15166667	male	163	73	Lower ed	91.3	higher >					-.57451529		15262364	15576288
15.25	male	174	72	Lower se	88666667	higher >					.96638628		-11511133	19413499
15583333	female	158	48		69633333	higher >											-.31675242		-.0664166	20351075
15583333	male	163	56	Higher s	70	low <2 h					.36158607		-.71914897	13833184
15.5	male	171	64	Lower se	71633333	low <2 h							-.19074675	.52692727
15.75	male	178	58	Higher s	68	higher >					-.60980991		.22322142	-.41502874
15.5	female	158	53	Lower ed	66.5												.14125128		-.94748244	-.77442749
15333333	male	165	62	Lower se	71.5	higher >					-.58458786		.80934832	.70471463
15583333	male	172	88	Lower ed	91.9	low <2 h					-.62078077		-.38218179	13157977
15916667	female	161	56	Higher s	66	low <2 h											-.3829081		11812208	-15808765
15.25	male	174	65	Higher e	73.5	medium 2	1	healthy	-102404	-.85643466	-.60061502	-.14792485	-.14313766	-.3541387
15833333	female	163	51	Higher s	61												-.75786098		24448341	-.79406195
15416667	female	162	58	Lower se	70	medium 2	1	healthy							-.91587104	-13390076	-.99862053	-.5509263	-.10488237	11066669
15583333	female	160	50	Lower se	66.5	low <2 h	1								-.23356824	.70341195		.29089622	13980733	19569286
15166667	female	161	53	Higher s	66.5	medium 2	1	at risk							10506433	16262004	-.87736321	.6556998	15115026	-.75483198
16916667	male	172	63	Higher s	71.1	higher >	1		-.90355396	-.83505584		.77478356	-.12362823	.70403775
15.75	female	151	73	Higher e	89	medium 2	1	at risk							-.22886652	19659667	-.5238297	.24396156	21288457	10872659
15.25	female	165	62	Lower se	66	medium 2											.44168896		15214108	.02198592
15.5	male	171	73	Higher s	83	medium 2							26323369	.39188971
15333333	female	166	59	Lower se	63	low <2 h													20123226	.32979539
15916667	male	174	67	Higher e	77.5								.37558353	-.39031983
15166667	female	161	66	Higher s	73	medium 2													-.28682977	.4177178
15166667	female	164	87		56.5	medium 2													22089243	15120976
13.5	female	161	67		80	low <2 h													10389032	-.18821149
13583333	male	158	41	Higher s	62.5	higher >							22954292	-.26397622
14083333	male	162	94	Lower se	117	medium 2							.03367872	.62049081
13166667	female	164	55	Higher e	69	low <2 h													-.29964732	.84793679
13.25	female	164	77	Higher e	92	medium 2													-.53834736	30325977
13333333	male	149	45		68	medium 2							-.58822882	.20542018
13916667	male	170	60	Higher e	69	higher >							-.31119659	-.21446473
14	male	160	46	Higher s	67	medium 2							.25908334	-.23585007
13083333	female	160	53	Lower se	67	medium 2													11340847	.22720546
13083333	male	165	63	Lower ed	79	medium 2	1	healthy	-.98155942	.22497667	-.52222542	.18862727	14451696	-.27074875
13.5	male	161	43		67	higher >	1	healthy	-.94996927	-12704114	.21422935	-.51327347	14730707	-13231264
13583333	male	162	56	Lower se	74	higher >	1	healthy	-.84429659	-.70966303	-.61280315	.43942765	.08075585	.07367647
13.5	female	163	54	Lower ed	67	low <2 h	1	healthy							-11181183	-.3399897	-10282531	.50093037	.47227823	-.50096798
14.5	male	166	57	Higher s	68	higher >	1	at risk	10062206	.98685599	-13460019	.0753982	15540262	-.09411191
13166667	female	149	47	Higher s	69	medium 2	1	healthy							.25754455	.18193806	-.6578682	-.60165105	.39807184	-.2469118
13416667	male	152	54		81	medium 2	1	healthy	-11385213	-12290447	.93586836	-.29859427	.22013224	.2515498
13.75	female	163	51	Higher s	65	medium 2	1	healthy							-11695934	-.88709558	-10367985	-.48813514	.17583305	-.35920147
16333333	female	166	70	Lower ed	79	low <2 h	1	healthy							-.53697975	-10096025	-13013136	.03623205	-.37046726	.81879057
13.75	female	155	60	Higher s	80	higher >	1	at risk							-.05009578	11343346	-13788297	24014352	16670706	11262312
13416667	male	143	43	Lower ed	71	medium 2	1				-1237354		14720147	.38662283
13.5	male	175	59	Higher s	68	low <2 h	1	healthy	-.92235849	.82699265	-.91768322	.20285419	.67439479	.5002761
13.75	female	154	61	Lower se	72	medium 2	1	healthy							-.1973981	.31154174	-.30970855	-.47105408	10844724	.34442454
13416667	male	168	58	Higher e	72	medium 2	1	healthy	-.80714778	-.68387049	-.76823555	.0640273	.59116528	.79184193
12.5	male	147	63	Higher s	89						-.31096678		.40915602	.01416988
12666667	female	159	72	Higher e	94	medium 2	1	healthy							-.43527574	-.38707558	-14309367	.39630222	11973084	29115801
12.5	female	159	48	Higher e	68	low <2 h	1								-.61736041	-10771452	-14390343		.27635692	.41800106
12916667	male	159	63	Higher e	79	low <2 h	1	healthy	-.30875276	13464362	-.77966331	-.22829728	.68095318	13934472
12833333	male	143	48		80		1	healthy	-.91217548	-.43796324	-13563891	-.53737886	14732411
13	male	156	70	Higher s	94	higher >	1				-.273085		.70753135	12368463
12.75	female	149	49	Higher s	72.5	higher >											-.74899635		-.91340019	-.37900749
12583333	female	164	48	Higher s	63	low <2 h											-.73607844		-.91993352	-.99518263
12.75	male	160	81	Lower se	100.5	higher >					-.15859603		.69013253	.35535602
13416667	female	160	71	Lower se	90	medium 2											-10687136		1213491	13023196
12916667	male	160	63		83						-.63644672		.13979978
15.25	male	163	52	Lower se	69						-.62167957		19152845	-.28662433
15416667	male	157	64	Higher s	78	higher >					-.25863944		-.65906371	.14320233
15916667	male	175	56	Higher s	72	higher >					-.40300889		25845864	-.79550038
15666667	female	161	62		71.5												-.76563822		.22942271	14048373
15.5	male	164	59	Lower se	70	medium 2					.30222098		20037265	20123404
15.25	male	173	64	Lower ed	71	medium 2					-.03303281		14396106	12662062
15666667	female	153	49		64												-.08407779		-.15541907	-.08060779
15583333	female	150	50	Lower ed	64	higher >	1	healthy							-.23356824	-.01930933	-14299227	.04248664	.08858416	.62788756
16	male	178	81		84.5									18843882
15.25	female	163	58	Higher e	67	medium 2	1	healthy							-11855891	-.58312614	-.65196771	-.38720599	.40177534	-.75972735
15083333	male	172	77	Lower ed	85	higher >	1	healthy	-.87624121	-.25039508	.08264223	-.18479525	.87106109
15333333	male	169	88	Lower ed	96	medium 2	1	healthy	-.83582592	.28353447	-.8393465	-.19379939	.55451819
15.5	male	180	63	Lower ed	72	higher >	1	healthy	-.12815418	-13925315	.47538038	-.92228917	-.33798882
15.5	male	175	89	Higher s	89.2	low <2 h					-.86964142		-.00952573	-.41833564
15083333	female	160	58	Higher s	66.2	medium 2														-.43726342
15.25	female	163	51	Higher s	64	low <2 h	1	healthy							-.65537702	-.13204765	-13815346	-.30108252	.62623686	.02198592
15.75	female	161	54	Higher s	65.5	low <2 h	1	healthy							-.99515097	.35127692	-15074126	-.90273109	.37294392	.61816206
16833333	male	175	61	Higher s	71.5	low <2 h	1	healthy	-.78776328	-.22803318	10841504	-.21213514	-.60082745	-10990631
15916667	female	166	58	Higher s	69	low <2 h	1	healthy							-.69584813	-.28709913	-10087294	.81239748	.3473027	11557718
15.5	female	160	59	Lower ed	73.5	low <2 h	1	at risk							1355094	19652189	-.80797815	.20040022	12117755	-.69625083
15166667	female	167	94	Higher s	93	low <2 h	1	at risk							-.18644061	.59912206	-10313003	-.62976991	.3785265	.80856772
15.5	female	160	72	Lower ed	79.5	medium 2											-14763985		.16955943	.6327525
15333333	male	172	75		75.5	low <2 h	1	healthy	-.69785717	-.58653742	-.40583768	-.62811481	-.94897962	12448398
15333333	male	156	68	Higher s	90.5		1	healthy	-14152947	-11055091	-.38694057	-10458199	-.73095828	-1253239
13916667	female	155	58	Higher s	76	medium 2													-.90273406	.02193459
13416667	female	166	65	Lower se	76	higher >													-11520003	-.65248989
13.25	female	155	75	Higher e		medium 2													.06845054
13833333	female	167	66	Higher e	85	low <2 h													-11478113	-.52042996
13.75	female	168	63	Higher s		higher >													.85464009	.34442454
13416667	female	161	75	Higher s	97	higher >													-.01335702
13083333	female	148	38		61														-.04220958
13.5	female	168	90	Lower ed		higher >													-.17452953
13.75	female	174	35	Higher s		medium 2													.7851559	-.2810208
13666667	female	159	64	Higher s	80	higher >													.136558	31639167
13916667	female	153	57	Higher s		higher >													.71935988	15854571
14	female	151	55	Lower ed	73														-.98101411	-.76469038
13583333	male	162	49	Lower ed	62.5	higher >							24511927	-10743427
13333333	male	164	71	Higher e	91	low <2 h							.71328234	14211366
13333333	male	156	60	Higher s	82	higher >							.80816945	-.13227884
13583333	female	165	64	Higher s		medium 2													-.06307868
13666667	male	164	80		102	higher >							-10310809
14	male	159	64	Higher s	75	medium 2							-.94717129
13833333	male	151.5	40.5	Higher e	60.5	low <2 h							15481309	-.05803264
14166667	male	165	65	Lower se	90	medium 2							33447659	-108881
14666667	male	173	58	Higher s	73	higher >	1		-.07938647	.25560361		.32446461	10806034	-.60946551
14.25	male	166	63	Lower se	75	higher >	1		-.30333919	-.44583419		-.07266078	-.98621086	-.23248958
16833333	male	170	62		77		1		-.06831359	11054147		.47346784		-.62605583
14333333	male	168	76	Higher s	84		1		.60220166	.52152701		.42308594	.18710678	.42125921
14583333	male	169	57	Higher s	68		1		-.68140624	.86720557		.91069549	15353186	14372605
14083333	male	167	108		117		1		-.23844453	-.64488649		-.3066819	-.15603263
14666667	male	171	63	Higher e	73	medium 2	1		-.85178844	11121126		.28662068	.03870379	.13315568
14833333	male	161	59	Higher s	81	medium 2	1		-.97189027	-.66310363		-.36304689	-.57626277	-13273527
14583333	female	155	50	Higher e	62	low <2 h	1								-.29136706	-.74649802		-.09524043	-.03534253	-13459593
14583333	female	165	64	Higher e		medium 2	1								-10864714	-.90058337		-.07536571	.55249613	-.32979196
14666667	male	157	52		68		1		-14862615	.043246		-.53132604	-.64362718
14333333	female	157	55	Higher s	71	medium 2	1								-.7107921	.93608992		.84205029	.36521497	10137131
14166667	female	162	47	Higher e	61	medium 2	1								-11868091	-.35696219		-.46119563	.2038402	-.14905595
15	female	152	49	Higher s	76	medium 2	1								-.25007377	.62303686		.9450718	.63130276	-12922237
14666667	female	160	60	Higher e		low <2 h	1								-10252051	-11174103		.04271825	-.90454591	-.4128398
14583333	female	166	68	Higher e		low <2 h	1								-10864714	-.03462621		-.18279379	.27995275	.53004198
14.75	female	162	58	Higher e	72	medium 2	1								-.61056045	.49345568		-.3158708	14032456	-.57405519
14.5	male	162	63		77								-.19570651
14.75	female	160	45	Higher e	65	low <2 h	1								-.43386755	-.94616105		.0059884	10051191	.52027664
13.5	female	151	66	Higher s	93.9	higher >	1								.53214	.2876771		-.50648726	.89991972	.20273413
13666667	male	166	52	Higher e	72	low <2 h	1		-.57303198	.05451663		-.00512995	.14701056	-.62299908
13333333	female	162	44	Lower se	61	medium 2	1								-.71047081	.01104267		.29117938	-.40013375	.44710706
13.5	male	166	53	Higher s	71	higher >	1		-.31492148	.32695522		-.44408322	.8868086	17834112
13.75	male	162	52	Higher e	70		1		-1157471	-.54166489		-.22893028	-.10956986	15164419
13666667	female	147	58	Lower ed	80.3	medium 2														.58386895
13583333	female	163	63	Higher e	75.7	higher >											-.99556135		17783805	.19784291
13083333	female	152	51	Lower se	76.1	low <2 h													-.25340787	.77465871
14	female	159	47	Higher s	71.8	medium 2											-.6895755		10525654	.40792237
15.5	female	157	54	Higher s	70	medium 2													.7895444	.3982225
16	female	148	56	Higher s	83.3	medium 2													-.38319977	-.41292831
13083333	female	156	47	Lower ed	74	medium 2														-.476663
13	female	167	62	Higher s	87	medium 2													.95181825	20309782
12916667	female	164	57	Higher e	73	low <2 h											.38705001		.12784451	-.31051388
13.25	female	161	49	Higher s	70												-10114593		19717109	.13921416
13	female	149	37	Lower se	62														14236992	-.15895674
12583333	male	142	38	Higher s	61	low <2 h					-.85861776		.6029644	-12912299
12916667	male	164	82	Higher e	98	medium 2					.59264143		-11011698	.71785499
13	male	152	38		60	medium 2					.1903481		10701662	.29107713
12833333	male	159	54		72						-.29314741		-11392013	-.00389261
12.75	male	164	90	Higher e	100	medium 2					-.99688003		15515614	.49049278
12666667	female	156	53	Higher e	66	low <2 h											.50782035		-.45536175	22074958
12833333	female	153	57	Lower se	74	higher >											.00305754		.09657384	-.69675406
13333333	male	167	55		72						-.64901995		.37197202
13333333	male	170	96	Higher s	112	higher >					-12017726		-.07838767	.61065899
13166667	male	154	51	Higher s	73	medium 2					.05399176		.73802231	.04560148
14833333	female	161	104	Higher e	104	higher >											-.97928847		11432594	-.03177149
15.25	male	173	65	Lower se	73	medium 2					-10435262		.87050076	.1184619
14416667	male	169	50	Higher e	65	medium 2					-.38753407		11027409	-.4777989
14416667	female	157	44	Higher e	65	low <2 h											-12751227		21813829	12433232
14666667	male	167	65	Lower ed	75	low <2 h					-.1186124		-.3548398	1415865
14083333	female	157	76	Higher e	75	low <2 h											11397483		.58410209	16537903
14666667	male	168	62	Higher e	80066667	higher >					-.59074206		.58513482	.6057328
14916667	male	176	64	Lower ed	72866667	higher >							10584948	-20238598
14333333	male	156	73	Lower se	89833333	higher >					-13036445		.50421795	-.52392919
15	female	147	44	Lower ed	60.2	low <2 h											15245524		-10226909	.1929675
14.5	male	171	81	Lower se	90.8	higher >					-1355784		.44416337	11886131
15916667	male	166	61	Higher e	74533333	low <2 h					-.76517295		19388779	-.72797029
14416667	male	160	46	Higher s	66033333	low <2 h					-1349787		34088445	-10854118
16583333	female	153	60		75933333	higher >													28277663	-.68195052
14916667	female	164	49	Lower ed	64.9	higher >											.45861964		.25267784	-.89649385
15083333	male	159	47	Lower se	66633333	low <2 h					-.86461949		29945434	-12565239
14916667	male	165	78	Lower se	97	higher >					-.26291876		-.27502886	-.9436795
14583333	female	157	51	Lower se	66.8	higher >											-.93335322		.38950451	.76454214
14.25	female	155	60	Lower se	71533333	higher >											-.80298656			.00240353
14583333	male	169	76	Lower se	81	medium 2								12347265
14916667	male	171	58	Lower se	71.8	medium 2					-.69329499		11377701	-.40358937
14.75	female	167	81	Lower ed	87666667	medium 2														.83294288
13666667	female	158	49	Higher e	71133333	higher >														-19179956
14.75	female	160	54	Higher e	68933333	medium 2											-.69594853		-.80649019	-15120539
13583333	female	163	60	Higher s	70766667	medium 2											-.67670447			-.19308752
14.75	female	171	54	Higher s	68033333	higher >														18491082
13666667	female	157	48	Lower se	62	medium 2											-10728165		.6069282	.27113588
13166667	female	151	48	Higher s	68266667	medium 2											-.63784671			-.48152222
13.5	female	159	52	Lower se	65.2	low <2 h											-.98466055		.4348596	-.50096798
13.5	female	156	51	Higher s	65.5	higher >											.19476112		-.57811619	14537601
14333333	male	184	72	Higher e	75233333	low <2 h					.72201073		16084443	-.79398302
13333333	female	163	56	Higher s	64366667	low <2 h											.06393433			16200449
13583333	female	148	51	Lower se		higher >											.98164765		22407498	.43240117
13.5	male	158	60	Higher s	84566667						.70210805			-.03999132
15166667	female	173.4	54.6	Higher s	66.1	medium 2											-.10427224			11994176
14416667	female	172.5	59.1	Higher s	65.5	low <2 h													-.11388924	.85248443
14333333	female	152.7	44	Higher s	63133333	medium 2											-.54259138		-.70895177	-28165486
14416667	female	168	73	Higher e	77666667	medium 2											-.45616521		16416332	-.32003195
13916667	female	162	56.3	Higher e	64466667	low <2 h											-.02350114		-.92678488	.25646297
14666667	female	161.2	54.5	Higher e	65933333	low <2 h											-.99203785		-.16974914	-.02200715
14333333	female	166.7	82	Higher s	95.7	medium 2											-.67536833		-.2520301	-.7059962
14666667	female	167	64.1	Lower ed	74666667	medium 2											.45091019		16952986	.83782469
14333333	female	167.7	47	Higher e	64	low <2 h											.19866945		-11391529	-.47149038
14333333	male	169	56.7	Higher e	67.5	medium 2					-.72004243			-.11884845
14666667	male	162.5	45	Higher e	63333333	medium 2					.79319402		-.0943649	-13520867
15083333	male	183	70	Higher e	76733333	higher >					-.97155084		12221435	.56631153
14.75	male	164.5	47.5	Higher s	66.4	higher >					-10759507		.18705122	-.63085325
14833333	male	176.5	63.7		74633333	medium 2					-10599135			-13273527
14.25	male	161.2	41.5	Higher s	58366667	low <2 h					-12967885		.81455683	-17178099
15	male	177.5	61	Higher e	69466667	low <2 h					.77311093		.66607721	-.96507524
15416667	female	159	41.3	Higher s	57766667	low <2 h											-.08146737		-.09419325	-.06595306
13583333	female	167	106.4	Higher s	10406667	medium 2											-10224435		-.56821044	13706342
13583333	male	148.3	36.4	Higher e	58766667	medium 2					-.71381737		.48007675	-.87175106
14583333	female	161.2	58.2	Lower se	70433333	higher >											-12850033			-.01712507
13.25	female	152.3	55.5	Higher s	72766667	medium 2											-11427462			-.64278139
13666667	female	166.4	80.5	Lower se	79466667	medium 2											-.44306589		.62830866	.19295262
14.25	female	159.2	59.5	Higher s	68.3	medium 2											-.35807161		.90311783	-.38844483
13.25	female	166.3	51	Higher e	64.2	higher >											-.81406794		-.57844414	-.7991805
13583333	female	163.7	47.5	Higher e	65066667	higher >													20483186	-.11490143
13666667	female	156.4	51.5	Higher s	63566667	low <2 h													.41717658	.11476935
14416667	male	189	80	Higher s	74966667	higher >							.08913117	-.27526125
14916667	female	150.8	46.6		62266667	low <2 h													-.6023675	-.03665384
15.5	male	182.5	78.5	Lower ed	79633333	higher >							-.46257827	-.35081686
14833333	male	171.1	63	Higher e	71833333	higher >							17142171	-.38219889
14.5	male	164.5	42.5	Higher s	63466667								10755394	-15793724
14583333	female	161	56.5	Lower se	66566667	low <2 h													.4349284	-11114592
13416667	male	164.7	55	Higher s	68966667	higher >							.59116528	-.6264249
13.25	male	158.8	42.4	Lower se	62.7	low <2 h							-.46758078	-10564927
14.75	male	169	56	Lower se	68.7	higher >							.64854406	.65185389
15.75	female	157.6	55		68333333	higher >													.91949173	.30542615
13.5	female	154.3	43.5		64766667	higher >													.48296927	-1126481
13333333	female	150.6	53	Lower ed	80333333	low <2 h													.75459843	.05612777
14416667	female	156.8	65	Lower ed	81333333	low <2 h													.98431431	-.39819971
13.5	female	145.9	37.2	Lower ed	59633333	medium 2													-.63691689	-.42277886
13.75	female	159	46.5		65333333	higher >													-.36133316	16734959
13833333	female	157.7	38	Lower ed	57466667	higher >													-.35945713	-.59860824
14083333	female	160.1	55.7	Higher e	65.7	higher >													19816562	-.30052125
13083333	female	160.2	42.5	Lower ed	61.9	higher >													-.60896955	-.476663
14	female	162.2	65	Lower se	75766667	higher >													.1760686	17368835
13083333	female	153	40	Lower se	60.9	low <2 h													21499752	.6182435
13.25	male	160.3	61	Lower ed	79.5	higher >							-.80182719	-.04334334
14333333	male	169	56.2	Lower ed	69.6	higher >							.52686875	-.05133499
14.5	male	169.9	51	Lower ed	65.5	higher >							12425851	.10842361
14583333	male	164.1	53.8	Lower ed	82666667	higher >							.176313	-.18301144
14	male	159.1	49	Lower se	71333333	higher >								-.84352166
13666667	male	169.4	65	Lower se	82	higher >							.10169935	-.01524846
13083333	male	166.7	70		79.8	medium 2								17557769
13416667	male	159.2	56.4	Lower ed	74.4	low <2 h							-.01778208	-13017901
12916667	male	163.7	74.4	Higher s	83.1	low <2 h							-.57701598	.31249966
13	male	155.5	36.9	Higher e	61066667	higher >							-.41578668	-15329062
13583333	male	158.5	61.6		91266667								-.06084731	-.33150676
13.25	male	154.7	50.4		68333333	higher >							.78159439	-10564927
12.5	female	150.3	58.5	Lower se	77666667	medium 2	1								-.38116121	-.22722919		-.16741455	.02226915	13569138
13083333	female	162.1	54.7	Lower se	68766667	medium 2	1	healthy							-.0691622	10066999	-1048163	.23602515	-.46193276	-.476663
16333333	male	171	50.2	Lower ed	62766667	higher >	1	at risk	31668428	28601117	-.9030407	.12212439	34604795	-.97023853
16833333	male	175.5	82	Lower se	82233333	higher >	1	healthy	-.51105186	.14277456	.78466691	-.71111507	.20965003	.18481374
15666667	female	176.6	62.8	Lower se	69433333	low <2 h											-12124004		.28020044	-.78423969
16916667	female	167.2	71.5	Higher s	85966667	medium 2	1	at risk							-.0779008	-.30665972	-.76588623	.19812872	24401729	-.23222145
15583333	female	160.7	47.9	Lower se	63566667	higher >	1	at risk							-.43983078	40830537	.16284659	.65816094	.4413445	-.38843793
12.5	male	160	38.6		58133333		1	healthy	-.67206358	-.5647053	.60452637	-11383169	-.92862695	-.86441719
12.5	male	161	43	Higher e	61533333	higher >	1	healthy	.32412565	.26331349	-12299191	.95345007	15825504	-.66166633
13416667	male	159	41	Higher s	61866667		1	healthy	-.66907548	-.53930963	-.49583953	-.57569569	.17198291	-19771552
12.5	male	154	39	Higher e	61466667	low <2 h	1	healthy	-.31232858	.83123282	10300394	-.47357945	-11440327	-.2561646
12.75	female	164	43	Higher e	57.6	low <2 h	1	at risk							.89502439	17596936	-10641646	-.07046502	28757185	-12394974
12833333	male	158	48		64333333		1	healthy	.24901643	-.47643538	-.19560557	-.08888904	15469108	11446903
12.5	female	161	54.6	Higher e	63933333	low <2 h	1								-.58783551	-.04706013		-.51409408	.78453246	-.91212525
12583333	male	161	46.6		67533333	medium 2	1		-.06815141	.49426669		-.30813814	.94588624	18173739
12583333	female	149	38	Higher e	57	medium 2	1	healthy							-.79196742	-14376679	-.69981762	-.28871957	.15785452	-.29104921
12583333	male	140	41.5		65.5	low <2 h	1	at risk	-.37247093	.1699	-.96751939	15906722	22835648	.19549366
12666667	male	154	43	Higher s	66533333	medium 2	1	at risk	28865099	30630208	-.51694414	-.02036623	.74006783	-.63680872
12.5	female	153	40	Higher e	57633333	low <2 h	1	healthy							.97698422	19890842	-10352831	-.44077954	.68557196	.41800106
13666667	female	160	48	Higher e	63766667	medium 2	1								20099364	11617389		-.01130621	14247309	.50568568
13	male	173.1	55	Higher e	70266667	low <2 h	1	healthy	.4326172	1575822	-.57068281	.27833873	17841035	-.1142525
12916667	male	157.2	50.3	Higher e	74.8	low <2 h	1	healthy	15985416	.34810614	-13613118	.51588515	-11918342	-.02529644
13166667	male	151.8	46.2	Higher s	65533333	medium 2	1	healthy	-.54423758	.28250716	-1090834	-.54666444	.25928739	-10351501
13916667	male	158.8	43.3	Higher e	64566667	low <2 h	1	healthy	-.20113797	.26355751	-.46804712	.28721309	10989715	-.61959051
13833333	male	166.6	58.7	Higher e	74.1	medium 2	1	healthy	-.85864799	14204434	-.54557473	.98300814	-.0319859	-.8007863
14916667	male	161.1	53.8	Higher e	67266667	medium 2	1	at risk	-.03882936	.18197069	-.79111947	.52145982	1375596	-.33607811
13416667	male	162	50.5	Higher s	66433333	medium 2	1		.739262	-.01469959		.07915214	-.77967435	-10991805
14833333	male	162.1	50.1	Higher e	68933333	medium 2	1		-.03395743	1107606		-.37668823	-.21952549	-11923307
13833333	male	161.2	43.4	Higher e	63.9	medium 2	1		.46608328	-.26733125		.16099074		-.86830935
13166667	male	160.5	54.6	Higher e	70133333		1	at risk	.09118462	.10335134	-.68603887	-.00135315	21458996	11939
13833333	male	156	36	Higher e	57.8		1	healthy	.24529474	-.83442135	-.0314577	.78765304	-.64930751	-16785861
12916667	female	179.3	66.3	Higher e	71.9	low <2 h	1	healthy							-.3394155	.68510386	.3514142	-.63444848	-.53523412	-.38873042
13	female	169	68	Higher s	74566667	low <2 h	1	healthy							-.60241442	-.87370405	-.01175756	-.58728136	-.77128234	.31031504
13416667	female	170	45	Higher e	60466667	low <2 h	1	healthy							.02879603	-.07252728	-.01044205	.31801194	.6495151	-.1833356
13916667	female	166.1	50.7	Higher e	62733333	low <2 h	1	healthy							-.48717953	-.78863548	.48542619	-.49143562	-.15448644	-.05624153
14	female	169.9	66.6	Higher e	70133333	low <2 h	1	healthy							.16321876	-.05666387	-.38901295	-.18142215	-.87145201	-.2174711
14666667	female	166.6	59	Higher e	68666667	medium 2	1	healthy							.62390754	.0037596	-.35760248	-.58789367	-.24456481	-.49100633
13416667	female	161.1	43	Higher e	59366667	low <2 h	1	healthy							-.20698158	-.24936922	-10721424	10380615	20353989	-.49610512
13166667	female	158.2	46.2	Higher e	63466667	medium 2	1	healthy							10536016	-.77165933	-.4284179	.18408604	-.09113355	-.32511527
12833333	female	163.1	73.1	Higher e	80766667	low <2 h	1	healthy							-.99090173	-11969289	10974913	-.05089121	-10478424	-.69675406
13333333	male	166.9	54	Higher e	67433333	medium 2	1	healthy	-.80238627	-.83252888	27762392	-.72867291	-12623521	-10102963
13333333	female	153.3	42.5	Higher e	60366667	medium 2	1	healthy							-.47466479	-.39154797	17828182	-.27157612	-11672822	.05612777
14666667	male	168	71	Higher e	82533333	medium 2	1	healthy	.61025815	17016578	18269088	-.20937931	-11291864	-.06937737
13833333	male	171	50	Higher e	66.6	low <2 h	1	healthy	-.63785944	.00085093	23086811	-.09756325	-12071623	-17461091
13833333	male	174	52	Higher e	63933333	low <2 h	1	healthy	.13490046	.16019294	23219432	.12903139	-11165463	-.86830935
14.25	female	158	53	Higher e	68966667	low <2 h	1	healthy							-.27143358	-.17772219	22743225	-.5115676	-.87649587
14	female	166	48	Higher e	61966667	low <2 h	1	healthy							.28103572	.92916552	1757599	-.26825021	-.89817447
13833333	female	164.5	44.7	Higher e	62066667	medium 2											-.19207988		-.7763495	-.44225167
14333333	female	168	58.7	Higher e	67133333	low <2 h											-11772968		3769415	-.15881596
14	female	157.4	45.7	Higher e	61533333	low <2 h											.23653699		-11627269	-.76469038
14666667	male	161.5	50	Higher e	67566667	higher >							-.46808975	-12170647
14916667	male	162	46	Higher s	67333333	medium 2					-.0117572		11207825	-19563485
13916667	male	163	48	Higher e	61966667	low <2 h					-.77419721		.04842459	-21725727
13583333	male	161	61	Higher e	74066667	medium 2					-.39057187		27145746	-16821175
14583333	male	172	63	Higher e	72.9	low <2 h					-.77634787		.4198015	-.52056809
14666667	female	155.5	49	Higher s	62.2	medium 2											-.56421413		-.07355757	-1038172
13916667	female	166	54	Higher s	64133333	low <2 h											.03519095		-.63817508	-.21259378
13583333	female	152	39	Higher e	55.9	low <2 h											-.53800156		-.44526832	-.74039011
14833333	male	171	53	Higher s	66366667	low <2 h					.46310692		-.2082005	-13948637
14.25	male	173	59	Higher s	66633333						-.33883881		-.79650734	.98277253
14666667	male	165	56	Higher e	67833333	medium 2					.26201597		.25670996	-13520867
14333333	female	170	54	Higher e	65566667	low <2 h											.34807429		-.97081332	-11750078
14083333	female	158.5	52	Higher e	64.8	low <2 h											.02092929		-12891014	-13167632
14666667	female	160	47	Higher e	62933333												.58287765		-.46633984	-.80367246
14	male	156	46.1	Higher e	66.1	low <2 h					21781754		-12218349	11820503
14166667	female	157	45.8	Higher e	61966667	low <2 h											17184845		-11950232	-.30539786
13	female	157.3	46	Higher s	66233333	higher >											21380782		-.47986579	.15389111
12916667	female	167.2	64.7	Higher s	71733333	medium 2	1	healthy							-10473487	-.72783534	-.68943079	-.72143063	.20538194	-.62338004
12.5	male	153.5	46.5	Higher s	74	higher >	1	at risk	.90523603	.81960596	-.91953958	12678539	12821161	-.45891546
14.5	male	169.5	101	Lower se	10136667	higher >	1	healthy	.89587531	-.09437597	-.78706943	-.0792899	-.62039891	-31321448
15666667	male	175.9	68.2	Higher e	76833333	higher >	1	healthy	-.22073961	.7258378	-11314619	.42440404	12273601	-.86628128
15666667	male	164.4	54.5	Higher s	66866667	higher >	1	healthy	-11316652	-.53493587	-11314528	.14419649	.15979256	-16765538
15.75	female	152.4	45	Lower ed	63.2	higher >	1	healthy							-.49411883	-.59910285	-.79520488	-.50631665	-.54910494
13916667	female	148.7	36	Higher s	59333333	low <2 h	1	healthy							-.45772346	-.08123097	.48542619	.83423983	-.29611903	-19324685
15833333	female	156.9	43	Lower se	60266667	higher >	1	healthy							-.66865848	-10786238	.26797483	-.05086556	-1041711	-11849962
15.25	female	165.6	54	Higher s	66.1	medium 2	1	healthy							-11855891	-.07709657	-12646014	.41799259	-.31169164	-.75972735
14916667	female	159.7	55	Higher s	66333333	low <2 h	1	healthy							.33656736	.64848035	-.6672459	.79660778	-.91499346	-12873302
16	female	153.9	57	Lower se	73533333	higher >	1	at risk							44956052	3577849	-.84618811	.59978811	.94257366	-.25654178
15833333	male	173	69	Higher e	74633333	higher >	1	healthy	-.45142546	-.23738377	.99079855	-.4814472	-.75266769	-.84160247
14833333	male	169.7	53.7	Lower se	67733333	higher >	1	healthy	-.19947499	-.00348794	.35135071	-.73844279	.76858015	-13948637
14.75	male	167.5	59	Higher s	74.7	medium 2	1	healthy	-.55321801	.16782221	23457619	-.52152077	-10275526	-.63085325
13916667	female	169.4	56		66133333	low <2 h	1	healthy							-.78174022	-.74983131	14691352	-.89731821	-13009087	-.05624153
14083333	female	151	52	Lower se	64333333	higher >	1	at risk							.84299575	10868472	-14716229	-.14859833	.98760241	.32485844
14.25	female	160.7	55.4	Higher e	67866667	low <2 h	1	healthy							-.33033403	-.57999743	-.58654314	-.28272477	-.5745494	-.4666145
15083333	male	179	70.4	Higher s	70766667	higher >	1	healthy	.14454688	.3871072	-10960775	-.29290072	-.04345195	.36377427
13.25	female	149.4	35.2	Higher s	59066667	higher >	1	at risk							.49572242	.93474965	-.9339479	.14926775	-.15876453	-23631716
13	female	159	48	Higher s	63666667	medium 2											16200479		-.09487513	-10192883
12666667	female	157	59.6	Higher s	78466667	medium 2											-.14542823		-.42059685	-.29591509
12833333	female	159.5	41.5	Higher e	60233333	low <2 h											-.4734758		14254871	-10096394
12833333	female	157.3	46.9	Lower ed	63466667	higher >											10132183		-1178862	-.30564739
13416667	female	154.9	46	Higher s	61.6	medium 2											-12208723		1462068	-10434518
12666667	female	154.6	40	Higher s	58433333												11212772		-.46338442	-.2176835
12.5	female	143.3	33.8	Higher s	61966667	higher >													.52643278	-14598243
14166667	male	161.8	49.6	Higher s	68.4	low <2 h					.62471781		.45668689	-14263893
12833333	male	143.5	44	Higher s	70533333	higher >					.16154607		-11703692	-.88222073
14.25	male	169.5	72	Lower se	80833333	higher >					-.01197835		.64750448	.5101706
13416667	male	160.9	40.5	Higher e	59366667	medium 2					-.09868531		-.32792038	-.89657096
14333333	female	162.3	45.1	Higher s	62	higher >											-12629779		211274	-.15881596
14833333	female	157.5	50.9	Lower ed	66.1	higher >											-.93926802		-.45994039	.51539616
14333333	female	165	71.8	Lower ed	77166667	medium 2											.14379654		-11605293	-.15881596
14916667	female	163.8	50.4	Lower se	68966667	higher >	1	healthy							-.37023999	-.11720963	-.52115942	-.03190807	.96477029	.82318616
15666667	female	161.1	61.2	Lower se	70.7		1	healthy							-12626371	-.26479995	22562295	-.23974632	-12832193	-.39333308
15083333	female	163.8	40.9	Lower se	60.5	low <2 h	1	healthy							-13080106	-14545518	21023675	-.91655302	-11357376	-.20275684
15.5	female	160.8	51.3	Lower ed	63633333	medium 2	1	healthy							-.82518619	.25007368	-.16755059	-.89657734	-.42637439	.55457583
14916667	female	166.9	50		64033333	low <2 h	1	healthy							-.34078969	-.41521759	18279567	-.76678581	-12623556	-.27115566
14416667	female	162	72	Higher s	81.5	higher >	1	healthy							.7934844	-.37615101	.73551879	34734444	-.59752633	.30531012
15916667	female	159.1	51	Lower ed	72.8		1	healthy							-.93168707	-.40657607	.18004951	-.33764669	.08269408	.68663206
15666667	male	168.9	52	Lower ed	67566667	higher >	1	healthy	-.82802331	.81333628	11513467	-.41806169	-12532477	-14739857
14.5	male	178.3	68.2	Higher e	72533333	medium 2	1	healthy	-.29033643	.00468301	.51914763	-.82697303	-.83274511	.71603018
15.75	male	168	95.1	Lower ed	95466667	higher >	1	healthy	-.55692293	.71031771	.07332733	-.46569736	.51490087	-.27997879
14583333	male	157.8	45.5		67233333	higher >	1	healthy	-14813981	-13760745	26077528	-.85089671	-10439608	-.18301144
14.75	male	158.3	54	Higher s	67333333	higher >	1	healthy	.16401528	-.41482108	15733694	-.34303472	-10190589	-.76587505
15083333	male	155.7	55.5	Higher s	75033333	higher >	1	healthy	-.68311914	-.96588555	.24397638	-.27088243	-.57007556	-13915487
15083333	male	179.1	80.7	Lower ed	83.3	higher >					10524762		-.94097713	.161237
13.75	female	158.1	60	Lower se	74433333	higher >											.72172886		-.19296763	.50078587
14416667	female	167.3	65.6	Higher s	76733333	medium 2											17598746		-10971956	-11798773
13333333	female	161	46.6	Higher s	62666667	higher >											.52038143		-.27183018	-13513977
13166667	female	166.2	59.5	Lower se	68266667	medium 2											19292298		-12566721	.06590208
14.25	female	156.2	43.3	Higher s	60466667	medium 2											.91331981		-.39017501	-14828202
13833333	female	168.6	58	Higher e	67333333	medium 2											14206883		-.65609208
13583333	female	162.2	57	Higher s	68566667	medium 2											16765721		-13646616	-.11490143
14333333	female	163.2	48.5	Lower se	62733333	higher >											18291193		-11685455	-.00247875
13333333	male	155	40.4	Higher e	69166667	higher >					17850301		-14719535	.13788037
13.5	male	172	64	Higher e	74.7	medium 2					.75491275		-.33669492	.16260896
13833333	male	166	53.3		68.2	higher >					.66428537		-14223754	-12734477
13916667	male	169	57	Lower se	62066667	higher >					-.20861067		.46467904	-12948001
13333333	male	168	52.5	Lower ed	66366667	higher >					.08373484		.53342171	.34049978
14166667	female	167.9	76.5	Lower se	79733333	higher >											.63662204		-.80889947	-.30539786
13416667	female	156.4	52.1	Higher e	71.5	higher >											.13595123		-.62009883	-.73068227
14083333	female	162.7	43.8	Higher s	62233333	low <2 h											-12977806		.81658241	-13167632
13	female	148.4	39	Higher e	65366667	higher >											-.04836697		-.02268938	-.39359263
13	female	147.2	46	Higher e	71866667	higher >											.22620362		-.93169512	.31031504
13416667	female	146.6	38.9	Higher s	62333333	higher >											.08105375		-.72701369	-14344137
13416667	female	143.5	39	Higher s	59333333	higher >											-.40577192		-.31806436	-12780289
13916667	male	175.5	62.2	Lower se	70.9	medium 2					-.56241844		10366749	-.34950666
13	male	144.9	29.7		56633333	higher >					22539903		-10404818	-.92491177
13	female	165.5	52	Higher e	62066667	low <2 h											.59954261		-.44510969	-.31538067
15	male	162	52.2	Higher e	65466667	medium 2					.77311093		.46788754	-17077044
15.75	male	182.8	62	Higher e	66.7	medium 2					16088819		-10001332	-.21245382
15.75	male	170.2	71.1	Higher e	75833333	higher >					20022545		-11530525	-.61760365
15083333	male	170.3	56.3	Higher e	67533333	medium 2					.48323849		.60774928	.02621215
15916667	male	169.3	69.4	Higher e	79633333	low <2 h					.5035397		-.82237573	.82522182
15666667	male	169.8	54.4		67233333	medium 2					.15345024		-12249303	.01151394
15.25	male	171.2	67	Higher e	78.3	higher >					.80826213		.00975752	-.82673929
15	male	191.1	72.9	Higher e	72533333	medium 2					.5586367		-.69576891	.38515966
15	male	173	56.1	Higher s	70666667	medium 2					.78983893		-.08704352	-.56000477
15166667	male	164.5	45	Lower ed	63633333	low <2 h					20132537		-11267355	-15479829
14916667	male	181	59.4	Higher s	69	low <2 h					24020295		-12206698	-.20105557
15.5	female	164.9	81.7	Higher e	80.8	higher >											23202641		-.53861305	.94545917
15166667	female	157.9	49	Higher s	67	low <2 h											.64879854		.60298404	-23182317
14333333	female	164	50.6	Higher s	62433333	higher >											22387935		-.58870923	-.47149038
15.5	female	163.1	64	Higher e	73533333	low <2 h											.80648072		-.40232325	.78910583
15833333	female	162	47	Lower se	60566667	medium 2											.61059299		-.06350061
15.25	female	165.1	64.6	Higher e	69466667	low <2 h											13675152		-11881604	-1150584
15583333	female	160.1	68.2	Higher s	72333333	low <2 h											1517922		-11140079	-.07572239
15416667	male	174.3	84.6	Higher e	93533333	medium 2					17676		-10837899	-.53196878
15833333	female	169.4	53	Higher e	60.8	low <2 h											1006623		-10123113	-.55950139
15.75	female	165.8	48.5	Higher e	63066667	low <2 h											-.24924986		-.47427199	-11018855
15333333	female	163.9	42.4	Higher e	59.3	low <2 h											-.17304678		-.36862195	-.06106904
15833333	female	166.2	59.9	Higher s	65566667	medium 2											.82229776		-.67822302	-10286225
15166667	female	158.6	58.5	Higher e	74033333	medium 2											1646667		-12087089	.26137783
16.25	female	156.7	57	Higher e	75533333	low <2 h											.54316122		-10139103	12928583
15666667	female	162.2	61.8	Higher e	74533333	medium 2											-.65297424		-.64983385	-12533276
15166667	female	169.3	51	Higher s	62466667	low <2 h	1	healthy							-.18644061	-.6418987	-.61377143	20086178	.38921495	.02686787
15166667	female	170.5	52	Higher e	63433333	low <2 h	1	healthy							-.74607381	-.8716542	18823719	.12397211	-1234094	-13020219
15583333	female	163.1	54	Higher e	66733333	low <2 h	1	healthy							-.97022016	-.2084071	.54890494	-.56389556	.09927386	-.46661681
14.5	female	163	51.8	Higher e	66.3	low <2 h	1	healthy							-.91215928	.29013162	-.67480998	15126457	34738101	-13410842
14.5	female	163.4	52	Higher e	62933333	low <2 h											.56042281		.06165684	-11065828
15166667	female	166	49.7	Higher e	63633333	low <2 h											21072657		-11098407	-.36398205
15083333	female	172.6	68.7	Higher s	68433333	low <2 h											-.58698478		-.23257671	-.90627659
15916667	female	172	68.2	Higher e	78733333	medium 2											-.12648032		-12938053	-14244966
14.75	female	159.9	68.4	Lower se	81.8	medium 2											.52245942		-1121785	.52027664
15083333	female	168.1	54.3	Higher e	64966667	medium 2											-.45292257		-.52650481	-1218952
14833333	female	163.2	54.5	Higher e	67933333	low <2 h											-.75917602		-.65499636	-.89160637
14333333	female	162.2	55.8	Higher e	67333333	medium 2											-12544447		.95841153	-.08064735
15333333	female	161.8	46.4	Higher e	63566667	low <2 h											13128745		.15246018	-12336624
14916667	female	171.9	53.9	Higher s	66.5	medium 2											14714212		-11180667	-14436648
14583333	female	163.1	50	Higher s	62366667	low <2 h											.00786763		-.60447723	-16586262
15.25	female	164.1	45.4	Higher e	59366667	low <2 h											.92724944		-.61097367	-14632693
14333333	male	176.5	58.6	Higher e	66566667	medium 2					-.15055837		.50988065	-.59144265
15166667	male	169.6	50.4	Higher e	62533333	medium 2					-.48591401		-.11311337	-12779297
14833333	male	178	79.6	Higher e	82566667	low <2 h					-.23868195		-.40921913	-.24717692
15833333	male	167.6	82.9	Lower ed	86933333	medium 2					10325489		-.41283453	.17130902
14.75	male	180	63.4	Higher e	67866667	medium 2					.33791178		-11577899	-.09076603
15333333	male	183.7	61.1	Higher e	74533333	higher >					-.668848		-.34021874	-.71311385
14583333	male	172.1	54.3	Higher e	66.9	higher >					-.58145339		15523061	-11956814
15416667	male	175.5	63.3	Higher e	73.9	medium 2					.4270039		-10214967	.00816811
15	male	174	71.7	Higher s	75.6	higher >					-.27388825		-.45511004	.52018315
15333333	male	186.5	75.4	Lower se	73333333	low <2 h					-.65657662		-.70830671	-.7806295
15833333	female	164	60	Higher s	76.8	medium 2											-.56168337		-.81453103	-.01219342
15583333	female	156	56.5	Higher e	72.1	higher >											.37577347		-12235774	-.70115347
14.75	female	170	49	Higher e	63733333	medium 2											15675506		-11698808	-15120539
17.25	female	176.2	65.8	Lower se	71133333	low <2 h											12553304		.04041453	-15041605
15666667	female	167.2	68.9	Higher s	76333333	higher >											.49807535		-.0111034	-.62787704
15666667	male	175.2	54.3	Higher s	65166667	higher >					10007652		-14288158	-17440765
16333333	female	162.2	47.2	Higher s	62.2	low <2 h											.54712019		-.48408974	-13710535
15833333	female	160	44.8	Higher s	61333333	medium 2											-.53269694		.35076883	12387962
15.5	female	160	41.7	Higher s	61.9	higher >											.38558255		-.27672285	.08551584
17083333	female	161	48	Lower se	67.3	higher >											-.14835736		12725848	-12593657
16333333	female	163	55.1	Higher s	69966667	low <2 h											-.68905849		.87804332	-.90180124
14083333	female	157.5	54.4	Higher s	67666667	medium 2											-.59576163		.71236709	-.37869371
16	female	159.3	71.5	Higher s	82133333												.37433683		-.75741002	-.56931483
15083333	female	158.2	51		64333333	low <2 h											-.13324059		.64119137	-.51543228
15083333	female	170	56.4	Higher s	70433333	higher >											-1118562		-.31273892	-.67177001
14.75	female	157	43.5	Higher s	60.7	higher >											-13749419		28942161	.28577696
15416667	female	171.7	73.4	Higher s	82733333	medium 2											-.59050762		.18906829	-.76952507
15.75	male	183.3	92.1	Higher e	91066667	medium 2					.54401751		-11955301	-.88770354
15.75	male	188.7	69.9	Lower ed	74133333	higher >					15188979		-.95482375	-.88770354
16916667	male	172.5	75.9	Higher s	78466667	low <2 h					-10773664		31185245	.50130522
15916667	male	166.3	65.9	Higher s	76.5	low <2 h							-.86485655	.82522182
15583333	female	159.5	54.4	Lower se	71.3	low <2 h											15327804		-10418524	.39335091
16666667	female	161.6	54.3	Higher s	69	low <2 h											.40593439		-.31495979	22857716
16083333	male	180.9	64.4	Higher e	78	low <2 h					19118776		-12138919	-.23053946
15833333	male	174.3	70.3	Higher e	77.5	medium 2					.2797407		12580118	33450983
16	female	164.5	52.2	Lower se	66	low <2 h											-.42432059		13221298	-.96028115
15833333	female	161.2	51.7	Higher e	67	low <2 h											-.22618201		-.08220956	11606094
16166667	male	184.5	69.4	Higher e	72	medium 2					.27110764		-.7341448	.42344428
16083333	female	182.1	60.3	Higher e	70	low <2 h											.03463256		.51144795	.59872739
15833333	female	165.4	63.4	Higher e	72.5	low <2 h											12381071		-.64347784	.76967512
16083333	male	173	66.2	Higher s	78	medium 2					.1283565		-.16310711	.30974859
15833333	male	188.8	65	Higher e	69.5	low <2 h					-.48583391		.21868876	.17130902
15833333	female	155.2	50.6	Higher e	63.5	low <2 h											.12159247		-.69693196	.06599344
16166667	female	165.1	58.2	Higher e	69	low <2 h											2510249		-12750222	.67207244
16416667	male	181.5	81.2	Higher e	86	medium 2					20053385		-.47876571	-.38374312
15916667	female	163	56	Higher e	68	low <2 h											13206914		-.7859706	-11117368
15833333	female	165.5	49.3	Higher e	62	medium 2											.59315458		-.98291151	-.01219342
16	male	171.2	61.1	Higher s	66	medium 2					.6393535		-1087512	10064598
16.25	female	172.9	60.3	Higher e	64.5	low <2 h											-.14914218		.83068309	-.50584577
16	female	152.4	43.7	Higher s	58	low <2 h													-.92580463	-.25654178
16.75	female	169.3	65.2	Lower se	81	low <2 h	1	healthy							.71472847	-.15243428	-.30913769	-.39087603	.6576618	-.30064851
16	male	189.1	83.2	Lower se	82.5	higher >	1	healthy	-.07465157	-10056769	.84696929	-.2770046	-.6626857	16142564
16	male	180	55.6	Higher e	69	medium 2	1	healthy	-.40606666	-.09962515	-.35450423	-.47956421	-.58621696	-.34419916
15.5	female	171.8	63.8	Lower ed	75.5	higher >	1	healthy							.08817442	-.15971216	.43519528	-.12917564	.10007836	-.85260416
15.75	female	154.1	38.1	Lower ed	59.5	higher >	1	healthy							.74372527	11976421	-.00021774	-.00275784	-.31926088	-21964611
15666667	female	162	47.5	Lower ed	63.5	medium 2	1	healthy							-.76166145	.10438641	.35158936	-.47264329	-.59905611	-.4715144
15.75	male	166	56.6	Higher s	69	medium 2	1	healthy	-.19803254	.8578424	19881245	-.33058849	-.87836409	-.34750377
15666667	female	161.3	63.8	Lower ed	80	medium 2	1	healthy							-.61431568	-.11355903	18487988	-.88374878	-14008098	-1096965
15166667	female	164	63	Higher s	79.5	higher >	1	healthy							.40264697	-12315146	.06809654	.30346217	-.39905854	.18320784
15166667	female	163.6	43.4	Lower se	63	medium 2													-.668942	-.91117194
15.5	female	154	45.3	Lower se	59.5	low <2 h													-.93679305	.08551584
15.75	female	162	55	Lower se	70														-.71881538	32764173
15.5	female	163.8	53	Lower se	64	medium 2													-10904531	-13998408
14833333	female	162	48.7	Lower se	62	medium 2													-.85539633	.59356296
15.75	male	188.5	72.2	Higher e	74	medium 2							-.8358865	-.41502874
15.25	male	166.2	59	Higher s	68	higher >							.2334375	.25349064
15416667	male	180.1	53.8	Lower ed	65.5	medium 2							.04315027	-10045886
14916667	male	166.4	64.8	Lower se	77	higher >							-11159132	-.9436795
15	female	152	43.5	Higher s	64	higher >													-10440672	-15267276
15083333	female	162.2	77.7	Lower se	91	low <2 h													-12399485	-.35909456
15416667	female	160	48.3	Lower se	63	higher >													-12887018	-16294464
15083333	female	164.2	64.4	Lower se	74.5	higher >													2730753	-.04641911
15083333	female	158.3	74.2	Lower se	89	low <2 h													-.26731367	.3444252
15416667	female	162.3	46.8	Lower ed	61	medium 2													-.6152876	-.22230239
15333333	female	164.9	57.8	Lower se	71	higher >													.20323229	-12336624
15.5	female	150.9	47.9	Lower ed	68	higher >													-.3943062	-16343708
15666667	female	157	47.4	Lower se	65.5	higher >													.25347532	-.00242647
15083333	female	161.7	49.5	Lower ed	64.5	medium 2													.75876261	-14534586
15583333	female	161	56.5	Lower ed	72.5	low <2 h													10132438	-.70115347
14833333	male	164.7	52.5	Lower se	69	higher >							-.52246906	-15973966
15.5	female	163.6	65.1	Higher s	73	medium 2													-.82321822	-.61807416
14833333	male	174.5	62.6	Lower se	76	low <2 h							.44015535	-.51722086
15333333	female	152	59.9	Lower se	83.5	low <2 h													-.93780397	-.60827926
15.5	female	166.9	49.3	Higher s	67	medium 2													.44213903	.78910583
14916667	female	156.4	47.4	Lower ed	66	low <2 h													.83517748	-.19298839
14833333	female	160.8	71	Lower ed	78	medium 2													.93083541	.984397
16166667	female	164.1	54.1	Lower se	65	higher >													-.17634314	-.26633417
15833333	male	176	67.6	Lower se	75	low <2 h							-.08999303	-.43643788
16083333	female	155	44.5	Higher s	61	medium 2													-10923844	-.10504379
16083333	female	159	48.2	Lower ed	62	low <2 h													.57560125	-15907829
15833333	female	164.3	85.9	Lower ed	92	low <2 h	1	healthy							-.31494588	-.34538794	.48852414	-.57092456	.27593306	.92604883
16.25	male	176.8	65.2	Higher s	77.5	medium 2	1	healthy	.18698752	.01292076	.74834959	-.41056108	-.53477812	.46960979
15916667	female	169.2	62.4	Lower se	68	medium 2	1	healthy							-.37156959	-11683589	-.02086898	.53943623	.26444546	12339617
16	female	154	60.3	Higher e	79	medium 2	1								-.69356693	-.97709461		-.14693403	12686712	-.02196199
15833333	male	187.5	99.8	Lower se	93.5	higher >	1		-.09249084	10289474		.28075826	.92384257	.23883645
15833333	male	173.8	57.8	Lower se	70	medium 2	1		-.53425653	-.41742337		.3683267	28354041	-.03127328
16166667	male	172.4	59.2	Lower se	69	higher >	1		-.66458791	-.38676519		-.87189464	-.23846765	-.45456611
15916667	male	180.9	55.5	Lower se	69	higher >	1		.92433941	-.49534705		-.43722469	.00741638	-.12019946
15916667	female	158.2	52.8	Higher s	67		1								-.40104945	-.50692595		-.18944944	.28315516	.84301196
15916667	female	162.1	61.1	Lower se	73	low <2 h	1								.07062842	14633821		-.01088438	.0319106	-.01707748
16.75	male	183.1	94.7	Higher s	87	higher >	1	healthy	.13023993	-.97031504	.55105972	-.22695743	-.96744668	.74674815
16.75	male	172.4	71.1	Lower ed	84	medium 2	1		-.06341269	-12642958		.03765455	-.51123169	.27377484
15833333	female	167.8	81.2	Lower ed	83	higher >	1	healthy							.09771881	-.43684921	12066678	-.37371094	-.82789456	.22236714
15833333	male	165.1	92.8	Lower se	90	medium 2	1		-.81036008	-.39797465		-.86653228	-1086837	17919674
16	male	171.5	58.2	Lower se	67	higher >	1	healthy	-.46130251	-.00690574	11336665	.28918267	-10167076	-.14160031
15833333	male	175.3	63.6	Higher e	73	higher >	1	healthy	-.09249084	.14520039	13939551	-.4286901	-13077285	-.63902017
16	female	155.6	52.1		68	higher >	1	healthy							18715352	.44320534	19082833	-.13871845	.1700968	.68177738
16	male	155	50.5	Lower se	72	higher >	1	healthy	-.40606666	14151856	.87979639	-.00540759	.95731857	-.41173211
15833333	female	162.5	67.7	Lower se	76	low <2 h	1								-.46232613	-.30856587		-.10583455	-.62209619	-.95043566
16083333	female	158	53.2	Lower se	65	higher >	1								-.8977086	.16849474		-.73670584	-.95338556	-.80881496
14	female	163.5	57.5	Lower ed	69.5	medium 2	1								.10431028	-.42523368		-.09948826	-11600546	-.76469038
14	female	156.5	45.4	Lower ed	65	medium 2	1	healthy							.22212724	.14410926	.21037583	-.34895183	-.66836128	-17809548
14.25	female	158.9	52.6	Higher e	66.5	medium 2	1								.1408696	.84780551		.08864503	-.18709597	.00240353
14583333	male	168.2	50.1	Lower se	64	medium 2	1	healthy	-.59864847	-.87725865	27243147	-.78411555	-13922059	-10606587
14166667	male	178.9	60.6	Higher s	69.5	medium 2					14341593		-.78631968	-.61619891
14	female	163.5	45.3	Higher s	60	higher >											-1440955		13091011	-.99921293
14.25	female	163.2	43.4		58.5	higher >											-.62619833		10126736	-.70112351
14583333	female	161.4	57	Lower se	69	medium 2											.37725934		-.70334101	.13920837
14	male	169	58	Lower se	67.5	higher >					-.06729494		-.36386506	.43934059
13666667	female	150.4	64.6	Lower ed	80	medium 2											-.99440708		.42519426	12093351
13666667	female	155.2	42.3	Lower se	58	higher >											16581587		-12558447	-.51069678
13666667	female	157	42.3	Lower se	60	low <2 h													-.78547449	-.43251352
13.75	female	149.1	35.1	Lower ed	55	medium 2													-10588475	-13755501
14	female	167	59.8	Higher s	74	low <2 h											-.18422551		-.87412426	-.06112273
14	female	163.6	52.5	Higher s	64	low <2 h											-.53181193		-.51604323	-.60834201
14083333	male	154	36.7	Higher s	57	medium 2					-.26809419		-.19850532	-14050302
14083333	male	168.9	51.7	Higher s	64	higher >					.45558404		1101159	.01283451
14666667	female	164.6	47.8	Lower se	60	medium 2											-1027145		14574917	-.88183899
15083333	male	174.8	67.4	Higher s	74	medium 2					-.80402943		-.21049922	-.04130027
14333333	male	190	70								-.92039948		.66277353
14583333	female	150.5	40	Higher e	61	medium 2											-.43812831		-.44148561	-.87695901
14666667	female	160.3	57.5	Higher e	71	low <2 h											.7505698		-.67208293	-.88183899
14.75	male	171	80								-.86469556		13450302
14.75	female	159.9	58.9	Higher e	69.5	medium 2											.5556068		.26230586	.75477632
15166667	male	185.7	74.3	Higher s	75	medium 2					24785753		-1081434	-.13020364
14666667	male	180	74.9	Higher e	76.5	low <2 h					23351178		-.34634605	.26817771
14833333	female	166.6	59.2	Higher s	68	low <2 h											24334836		-.72446835	.51539616
14666667	female	159.3	46.7	Lower se	62	low <2 h											-.17113071		.26044096	-.80367246
14.75	male	175.9	63	Higher s	71	medium 2	1	healthy	-.93942056	.26692282	-.4005646	-.64514006	-.20082926	-.09076603
15333333	male	177.9	87.6	Higher e	87.5	medium 2	1	healthy	-.17357593	-.38693065	12288749	-.33737652	-12915846	-.10547307
15	female	168.3	63.5	Higher e	76	low <2 h	1	at risk							-.66239363	.32740947	.72494741	.17220303	-.60318036	.34930342
14583333	male	177	67.2	Higher e	74	higher >					-15962731		.51040187	14372605
14583333	male	182.9	67.6	Lower se	70	higher >	1	healthy	.11858561	.23644285	.54730426	.25482713	-.5683088	.08703388
14.75	female	159.4	51.2	Higher e	65	low <2 h	1	healthy							-.90504861	.40905157	.84101973	17589425	-.84122606	.12944385
14666667	female	162.6	46.2	Higher e	63.5	medium 2	1	healthy							-.58347848	-10688748	-12796028	-.11927871	-.45565188	.29065898
15.5	female	154.4	39.5	Higher s	59	low <2 h	1	healthy							-11198186	-13305178	-11792681	-.00076176	-.33016983	-.14901416
15333333	male	181.9	63	Lower se	70.5	higher >	1	healthy	-.55988842	.97914808	.11626714	-.50952514	-.17316343	.63719899
15083333	male	176.6	58.7	Higher e	67.5	medium 2	1	healthy	-.76588574	-.92930353	-.30989703	.03032196	-.51628067	-.85144934
14666667	female	161.2	50.8	Higher e	63	low <2 h	1	healthy							-11429988	-18411489	-.0714515	-.71031539	-.94195374	-11163386
15.5	male	182.6	81.9	Higher e	83	medium 2	1	healthy	-.73531612	-.08299515	-.85848952	-.11938694	.16320055	.18933338
14833333	female	174.4	56.4	Higher e	64	low <2 h	1	healthy							-.28425515	-.1712812	-12922077	-.12799274	.3042515	-.73527275
14583333	female	163.1	57.8	Higher s	67	low <2 h	1	healthy							-.46805691	.89326467	-15385625	-.45573992	.25590481	.29554181
15666667	female	164.5	52.2	Higher s	66	medium 2	1	healthy							-.64378484	-.23203193	-17450624	-.52858788	.04769187	-.94060233
15666667	female	167.4	59.3	Higher e	69	low <2 h	1	healthy							-.05440175	-.0092094	-.40677663	-.62240265	-.88501493	11702933
16166667	male	173.5	52.6	Lower se	64	low <2 h	1	healthy	-12171182	.17890057	.41860657	-10513748	-.98623204	-.72472315
16166667	female	168.1	63.8	Higher s	75	low <2 h	1	healthy							-.21713503	15739722	-.84421011	-.5255978	-.27525098	-.03173252
15583333	female	157.7	47.9	Lower se	64	medium 2	1	healthy							-.17463609	.86277717	-14083109	-.85918431	-.6035744	.54970868
15666667	male	182.2	59.4	Higher e	67	medium 2	1	at risk	17115267	2132376	-14814863	.67379739	13547885	-13389402
15916667	female	155	50.2	Lower se	65	low <2 h	1	healthy							-.63688839	.16415211	12960992	-.09091112	-11681831	.60844211
16333333	female	164.2	51	Higher s	67	higher >	1	healthy							-.95001717	-14341711	11392668	-.53541081	-14425288	-.11971405
15.75	female	164.4	53.4	Lower se	65	low <2 h	1	healthy							24826015	.64148181	-.91639992	.3678447	.08162994	-.47641363
15.75	female	166.5	68.8	Higher e	97	low <2 h	1	at risk							17457895	24201696	-15287173	.96539186	-.37004038	.22724217
15916667	male	171.2	97.9	Higher e	94	medium 2	1	healthy	11728655	.29608569	-16342113	.20775941	-11848788	11628723
16083333	male	180.2	60.9	Higher e	69	medium 2	1	healthy	.16905861	-.36871507	-16014213	-.40192253	-.38969142	.71496462
15666667	male	182.8	81.6	Higher s	82	medium 2	1	healthy	-.02751297	10048424	-12132437	-.06055948	-.8341496	.88930916
15583333	male	174.3	62.3	Higher e	72	low <2 h	1	healthy	-.57465465	-.40689731	-15923386	-.17863618	.86374731	-.43973906
16.25	male	184	69.3	Higher s	74	low <2 h	1	healthy	-.89062899	-12172557	-15041193	12275155	.7965374	.73978065
15916667	male	178	70				1	healthy	-.01453701	-14603252	-12941703	-.34507793	-.91583354
15.75	male	178	64.9	Higher s	73	medium 2	1	at risk	.96145948	.99488596	-1750736	.79627884	-.15624505	.05764606
15583333	male	176.5	60.7	Higher e	69	low <2 h	1	healthy	-.71265921	-.3119621	-.26622966	.35885447	.15866471	.30298803
15666667	male	183.9	72.7	Higher e	74.5	medium 2	1	healthy	.55216692	.19704259	-1745641	.71296309	-.5962831	15645363
15583333	male	179.2	74.7	Higher s	86	low <2 h	1	healthy	-.32624646	-.84620536	-11895875	.194722	-.33404362	12482771
15666667	female	159.8	50.2	Higher e	64	low <2 h	1	healthy							-.96794554	-.40324484	.18421132	-.55963073	-12377866	-.15878912
12.5	female	159.8	57.6	Higher s	65	higher >	1	healthy							-.35163631	-.92731469	-10102096	-.63967626	-.99408193	.73097196
12.5	female	160.5	60.7	Higher s	74	medium 2	1	healthy							-.144962	-.02676076	-.84102985	-.20307541	-14434161	12004283
13083333	female	166.2	60.9	Lower se	50		1	at risk							.90393813	.11160426	-12551471	23054121	10913104	.38362068
13.25	female	157.9	57.8	Lower ed	70	medium 2	1	healthy							-.15282769	.38309385	-14549633	.01435464	-.78160114	-.95557961
12833333	male	177.1	82.5	Higher s	86	medium 2	1		14931506	13561625	-15978412		.32285973	.94199921
12.75	female	154.8	60.3	Higher s	72	low <2 h	1								-.01970944	-.12509918	-16878771		27580606	12637459
12833333	female	153.2	61.4	Higher s	81		1	healthy							-.10583404	-.79948204	-13925073	-.30064641	-.82591119	1180558
12583333	male	162.8	44.9	Higher e	60.1	medium 2	1	at risk	19237582	.15607428	-12621904	202796	.3932436	-.41271142
13333333	female	155	49.7	Higher s	71	higher >	1	at risk							.58646231	14832024	-16813612	.64810774	14228462	.21251949
13166667	female	155.7	50.4	Lower ed	64.1	low <2 h	1	healthy							15843064	-.61312377	-15655288	15941536	-.68459582	-.09050486
12916667	female	162	45.1	Lower se	59.1	higher >	1	healthy							-.04444331	.41903738	-17667534	.60238393	.19468712	-14055454
13083333	female	165.5	61.8	Lower ed	71566667	low <2 h	1	healthy							.60905924	-12151732	-12322364	-.24989671	.09680702	.93107393
12666667	male	159.2	45.2	Lower se	66	higher >	1	at risk	22780084	15030403	-.84098456	10294574	-.46431926	-.29894241
13083333	male	173.7	58.5	Lower se	70.1	higher >	1	healthy	.64871447	-.27135025	-1291753	.29024513	-.32256845	.81006495
13.25	male	169	48.8	Higher e	66.1	higher >	1	healthy	11635738	.63078717	-.66380602	-.64068456	.03945404	-.71877622
12583333	male	159.6	43.6	Higher e	64.1	medium 2	1	healthy	21727469	31493824	-.07004172	-.56290517	-13723788	-.34513308
13166667	male	155.5	38.8		60.1	higher >	1	healthy	-.21271295	-13118776	-1212944	-.14154682	.61054852	-.83250917
13166667	male	151.3	36.9	Higher s	59.1	higher >	1	healthy	15277913	1346911	-.8565058	-.80031871	-11485899	-10351501
12833333	male	148.5	36.7	Lower se	58.1	higher >	1	healthy	.27666386	.24782918	-15319906	-.18582122	.85838207	-.74709333
12833333	male	153.8	35.3	Higher s	57.1	medium 2	1	healthy	.05548445	-.16103254	-15978412	14632518	-.36850244	-16929852
13916667	male	164.5	53.3	Lower se	70.1	higher >	1	healthy	-.36671488	-10067608	-1341333	-.49200681	-13532485	.05561912
13333333	male	152.4	69.6	Higher e	89.1	medium 2	1	healthy	.16425781	.86834073	-10964046	.03926283	-.5145851	.8132784
13583333	female	144.2	34.6	Lower se	59.1	low <2 h	1	at risk							-.49684391	14131139	-11894473	.39946195	2037628	1214262
13333333	female	154.4	39.4	Higher s	57.1	medium 2	1	healthy							.64541381	.36727958	-1749275	.13644837	.16654037	.68169463
13833333	male	168.5	77.5	Higher e	84.1	low <2 h	1	healthy	-.08588808	.06281727	-.37213809	.11837827	-.12826542	.68472102
13.5	male	167	56.5	Higher e	67.1	higher >	1	healthy	-.89474772	-12246694	-.60310042	-.31771453	-.9796007	.5002761
13166667	male	161.7	44.9	Higher s	68.6	higher >	1	healthy	-.10220474	-.5718927	-.97180585	-.0391109	-.91063877	.2482424
13416667	female	171.7	57.2	Higher s	57.1	medium 2	1	at risk							12666285	50672981	-18512443	.53321252	29107643	-.57429751
13.75	male	173	57.6	Lower se	70.1	higher >	1	healthy	.08458474	.04618696	-14372816	.11422043	-.87700022	.84118835
13833333	male	168.2	53.7		70.3	low <2 h	1		10732518	10860992		-.17449602	.49755144	.27958266
13	male	160	53.6	Lower se	68.1		1	healthy	-.25830095	.15767841	-15234595	-.57424127	13024791	.22352219
14	female	168.2	54.7	Lower se	64.5	medium 2	1	at risk							38744531	15345101	-18232768	11127419	18355337	-.53016783
13.75	female	154.3	53.6	Higher s	70.5	medium 2	1	healthy							.39181116	.38946451	-.49696351	-.48687935	-11577288	-.43738213
14083333	female	170.2	66.8	Higher s	69	medium 2	1	healthy							.28339525	.34721822	-.18822474	-.50412125	-10432602	.24668597
13.5	female	168.2	55.6	Higher e	64	medium 2	1	healthy							-.6466159	-.06596712	-1294061	-.40156295	-13719257	.04635588
13916667	female	161.3	52.7	Higher s	64	low <2 h	1	healthy							.77943144	-.22161912	-.50781045	-.14042715	.06464322	-.99435504
14.25	female	156.3	46.6	Higher e	63	medium 2	1	healthy							.19977006	-.38277611	-16202406	-.03244825	-.29130758	-10138022
14416667	female	164.1	45.8	Higher e	62	low <2 h	1	at risk							10585234	20472285	-16336513	-.04700285	.61557443	-.47636747
13.75	female	156.2	48.9	Lower ed	64	medium 2	1	healthy							-.99283059	-.22786542	-10947562	.33717399	.477822	.03170187
13833333	female	172.9	54.1	Higher s	66	low <2 h	1	at risk							.5414461	37718075	-10712106	.13530426	.57320593	-.67678653
14.5	female	155.7	50.4	Lower se	70	higher >	1	at risk							25922027	.44823254	-16084163	.99055401	17944535	-.09041014
14166667	female	159.7	41.7	Lower se	58	medium 2	1	at risk							31130836	29818838	-16241933	.10492423	1473105	-.53991073
14333333	female	154.6	44.5	Lower se	58	low <2 h	1	healthy							.61442999	-.43749696	-10866892	.21231001	-.96814126	.23202707
13.5	female	157.8	42.5	Higher s	61	medium 2	1	healthy							-.94130487	-.10707051	-.12638459	.09465543	-10217942	-.18821149
13.75	female	166.8	47.9	Higher s	61.5	medium 2	1	at risk							.53911347	19765306	-18786894	.84716382	.95352143	-.2810208
13.75	female	165.5	60.5	Higher e	70	low <2 h	1	healthy							.42127162	-.01568051	-10905179	.29787245	-.7755658	-12191888
13833333	male	172.9	70.9	Higher e	77	higher >	1	healthy	-.4170709	.62051431	-11439573	.50822471	1137527	23052744
14083333	female	181	80.6	Higher s	74	low <2 h	1	at risk							14615016	.3441573	-16920538	-.00201371	.83261553	.32485844
13916667	male	177.8	69.1	Higher s	76	higher >					14904571		.70253872	.86587069
13.5	male	167	52.3	Higher s	65.5	higher >					.59649866		-.70771103	-.44519189
14	female	164.1	57.4	Higher e	69.5	low <2 h											.76901476		-.01900539	-.53016783
13166667	female	169.7	55	Higher e	64	higher >											-.79801869		-11791477	-110715
13833333	female	170.3	47	Higher e	62	low <2 h											15544114		-.80307337	-.05136023
13083333	female	161.4	55	Higher e	68	medium 2											27568636		-10768139	.22720546
13833333	male	170	51	Higher e	64	medium 2					14955354		-.65213926	-.26060182
13.25	female	165	42	Higher e	63	higher >											.73401215		-.95802697	-16593756
13833333	male	165.9	59.2	Higher e	71	medium 2					-10419669		-.3236562	-.32812488
13333333	male	156.7	56	Lower se	72	medium 2					31812372		-12340276	15562162
13.5	male	157	46		64.5	low <2 h					-.97241252		15523719	-21335276
13333333	male	175	64		76	low <2 h					.8591971		-.97627459	.27295998
13666667	male	172.5	53.7	Higher e	63	higher >					-.61811162		-.97727383	.32239077
13416667	female	161.5	59.8	Higher e	68	low <2 h											.84125668		-11145801	-.10514322
13583333	female	171	47.5	Higher e	65	medium 2											-.84027086		1070127	.04147074
13.5	male	156.7	45.1		64						-.32290754		-.57459838	-21335276
13.75	male	162.6	61	Higher e	72	medium 2					.19516312		-11658486	10437644
13.75	male	173.6	53.2		67						18537671		-13499186	.16593481
13416667	male	172.8	88.9	Higher e	90	low <2 h					-10802959		-.42280288	24802548
13333333	male	156	51	Higher s	67	medium 2					18658273		-.61088843	-10778361
13.75	male	169	69.8	Higher s	72	higher >					.79846597		-12196536	.30098551
13583333	male	164.6	41.8	Higher e	58	low <2 h					.8587879			-.3990373
13833333	male	169	56		67	medium 2					.79340975		-.68895201	.61719796
13333333	male	168.5	54.3	Higher s	64	higher >					.61882075		.61273034	.8808182
13833333	male	184.1	62.5	Lower se	70	higher >					-.18314474			-.66574018
13833333	female	168	46	Lower se	58	medium 2											-.86640574		.78432451	.65224435
13.75	female	160	47.3	Higher s	59	medium 2											.16375919		-.77823827	-.59374347
13666667	female	160	47		66												.65396818		.00560266	.03658608
13.5	female	155.7	65	Lower se	73												.97112024		-.23733937	19228948
13583333	female	165	48.9	Lower se	66	low <2 h											-.09408424		-.14325833	-.34945969
13416667	male	150.6	37	Lower se	55.5	higher >					.40792882		-.96377472	.6567689
13.5	male	170.4	66.7	Lower se	77	medium 2					-1232763		11190477	-.17505818
12916667	male	153.6	66.2	Lower se	87	medium 2					.00535217		11852741	13934472
13583333	male	168.7	61.8	Lower se	71	medium 2					-.3180639		-.94728309	.47885969
13	male	168	55.3	Higher s	70	low <2 h					12198303		-.89032834	-.24936238
13.5	male	159.7	45.3	Higher s	63	low <2 h					.40288144		-.22057537	-.44519189
13.75	male	173.8	67.9	Higher s	72	medium 2					1459517		-.95912377	-.64436944
13	female	152.2	37.1	Higher e	56	higher >											.60628598		-.50392771	-.94107638
13416667	male	164.5	47.1	Higher e	64	higher >					-.69355142		-.90712845	14672071
13	male	161.7	47.7	Higher s	70	medium 2					-13943816		-11169751	-.51958214
13.5	male	151.7	46	Higher e	66	medium 2					20459577		-14497433	-1728327
13.75	male	171.6	75.7	Higher e	80	low <2 h					.2171575		.06034093	-.30674267
13416667	female	169	56.9	Higher s	65	medium 2											-.30322859		-.51318398	.12943392
13666667	male	169.2	47.7	Higher s	65	higher >					-.75921327		-.40521981	-.15030416
13333333	female	163.7	61	Higher e	71	low <2 h											.26626998		-.14619959	.13432363
13333333	male	174.1	56.3	Higher s	66	medium 2					-15216584		.46261044	-.26735844
13416667	female	155.6	49.4	Higher s	64	low <2 h											.44333054		-.57466002	-12780289
13333333	female	157.2	55.9	Higher e	72	medium 2											-.25933537		-13036048	-13513977
13.75	male	159	37.9	Lower se	57	low <2 h					-16754163		.55591404	-.30674267
13.75	female	170	55.2	Higher s	64	low <2 h											-12616834		-.78358321	-.5155628
13.75	female	172.5	59	Higher s	66	low <2 h											.05913988		-.66332212	-.90646614
13583333	female	167.4	61.7	Higher s	69	medium 2											-.57975701		.21220477	-.34945969
13083333	male	163.2	81.2	Lower ed	91						-11199053		-.09026954	.13455639
13166667	male	164.8	52.4	Higher s	70	medium 2					-.67983893		-.58487241	-.15703944
13	male	170.5	48.4	Lower se	66	medium 2					-.5538159		.29390101	.89907158
13916667	female	161	46.9	Higher e	62	low <2 h											-16573878		15050199	.72551973
14583333	female	168.6	64.7	Higher e	76	low <2 h											-.70624314		24950357	-.09529179
14166667	female	164.8	52.3	Higher e	63	medium 2											11539396		-10574081	-.07088499
14583333	female	172.3	71.6	Higher e	74	low <2 h											16448805		-.25711802	18588762
14583333	female	162.9	61.8	Lower se	74	low <2 h											10714629		-.70066902	.53004198
14083333	female	168	77.2	Higher e	79	low <2 h											28716649		-.99783297	17319627
14	female	161.2	45.4	Higher e	60	low <2 h														-.2174711
14166667	female	170	59.7	Higher e	68	higher >											2365429		-10119818	.24179884
13833333	female	161.5	61.4	Higher e	73	low <2 h											12275328		-12867754	20594535
14.5	female	164.1	66.3	Higher s	75	medium 2											.47755371		-.63039303	-11065828
14333333	male	161.9	37.9	Higher e	58	higher >					13340881		-.28006593	-1536631
14333333	male	166.2	47.7	Higher e	65	low <2 h					-11739135		-.0337385	-.05133499
14.25	male	182.9	85.7	Higher e	78	medium 2	1	healthy	-.30333919	-.96316789	.63770943	-.59784633	-.12263516	18604618
14.5	male	164	44.4	Higher e	63	medium 2	1	healthy	-.42826802	.26585368	11043553	-.53886465	-.86955179	.71603018
14666667	male	167.6	50.3	Higher s	64	higher >	1	at risk	14378317	-.0555871	.08063017	.41511735	15024595	-.06937737
14666667	female	161.2	49.8	Higher s	61	higher >	1	healthy							-.20064876	-.00263566	-.62553316	.71822858	.06805781	.6033251
14583333	female	169.3	50.5	Higher s	62	medium 2	1	healthy							10632551	.49538342	-10294173	.25866903	.14902505	-14241261
14333333	female	165	73.2	Lower se	77	medium 2	1	at risk							32943235	33677987	-.75731301	22642544	.886266	-.86233341
14583333	male	172.5	69	Higher s	78	medium 2	1	at risk	.72547598	.51044296	-.50816079	.2648997	13088176	.22205654
14416667	female	163.1	82.4	Lower se	85	medium 2	1	at risk							56230839	34975034	-.69862672	.1919631	.46326883	.69614892
14666667	female	179	69.2	Higher e	71	medium 2	1	healthy							-.78961755	-.94049364	-.15068656	-.42918593	-1332064	.21249245
14666667	female	180	65.1	Higher e	66	low <2 h	1	healthy							23613655	-.12728063	.0330289	-.56503185	-.46099586	-.88183899
14	male	167.5	59.1	Higher e	70	higher >	1	healthy	.4286671	-.36457381	-11186205	-.28686344	-.01274869	-14511933
14166667	male	171.2	59.6	Higher e	68	higher >	1	healthy	-.07775947	-.19349238	-.52434143	-.04142874	-.81180273	-.75123064
14.5	male	166.8	52	Higher s	71	higher >	1	healthy	-.78689018	-.36695001	-.56503104	-.1352798	-.00601057	-13768369
14666667	female	165.2	54.6	Lower se	64	medium 2	1	healthy							.97728881	.33179124	14185373	26346928	-11557128	-.88183899
14083333	female	160.4	54.5	Higher s	68	higher >	1	healthy							-.3056579	.132954	.59784699	.12620424	-.88827328	-.69138355
14	female	160.7	51.8	Higher s	64	medium 2	1	healthy							-12211306	-19000239	.03911102	-.60326309	-11413489	-.84286457
14583333	male	181.8	65.4	Higher e	73	higher >	1	healthy	-10124374	21849774	-.11141695	-10449952	-.84294118	-.45305676
13.5	male	154.8	52.4	Higher s	72	medium 2	1	healthy	-.53580767	-.09718296	13111466	-.37454732	-13817708	.09507553
13583333	female	162.5	49.8	Higher s	61	medium 2	1	healthy							.71125552	-.25462976	-.15965582	.08952589	-.96376336	-12095066
13666667	male	165.5	78.4	Lower se	89	higher >	1	healthy	12212386	-.52896472	.89041796	.27997209	-1311444	-.55547124
13583333	female	167.2	43	Higher e	58	low <2 h	1	healthy							.94698223	.18086285	11752427	15853599	-12123203	-19131814
13.5	male	172	51.9	Lower se	65	medium 2	1	healthy	-.70147231	-12772521	-.26434257	-.73550607	-12005111	-.51272531
13.5	female	176	81	Higher e	86	medium 2	1	healthy							10625802	.63690078	.86171576	-.13617574	-10324853	-.50096798
13416667	male	173	66.5	Higher e	72	higher >	1	at risk	-.06155735	-.2786324	-.99601537	-.30167685	15428225	-.08613277
13166667	female	162	53.8	Lower se	63	low <2 h	1	at risk							78937959	13402609	-.69650092	21266674	-.61241798	23338027
13333333	female	164.7	52.3	Higher s	64	medium 2	1	healthy							.55698655	-.69453793	-.62722734	-.36875417	-.68614381	-.33485152
13083333	female	172	87.9	Higher e	98	higher >	1	healthy							-.59994419	-.38011921	-.94191062	-.79471113	.70366793	-12587391
13583333	female	173.7	63.3	Higher s	66		1	healthy							-.99776318	-11005867	.23526857	64440873	-.90763761	.04147074
12.75	female	165.1	59.6	Higher s	68	low <2 h	1	healthy							.15733582	-.8359978	-.35867611	.80060151	-.94281466	-15524028
13666667	male	174	60	Higher e	68	higher >	1	healthy	.28269706	-.4969264	-.67382498	-.72214719	-10339128	.52497431
13583333	male	176	56	Higher e	68.5	higher >	1	healthy	-.6510452	-.66247366	21472071	-.174651	-.9076342	.07367647
13666667	female	170.5	71.9	Higher e	78	higher >	1	healthy							.21269164	.06962726	10660754	37396548	-.99393401	12093351
13.5	male	165	47.4	Higher s	64	medium 2	1	healthy	-.67386153	-11585493	17473998	-.47579782	-.63973861	-.03999132
13583333	male	165.6	52.7	Higher e	66						13060559		-.17979397	.81651238
13166667	male	162.2	57.4	Lower se	74	higher >	1	healthy	.20169283	-.2542976	-11246129	.78752447	-.63019642	-.69741522
13583333	male	160.2	63.6	Higher s	84	low <2 h	1	healthy	-.07129104	-.03503293	-12911525	.80434377	.60468753	-.46656784
15333333	male	174.6	66.6	Higher s	69	medium 2	1	healthy	-.55988842	-14589396	-11112137	-.21844139	.26854214	10422928
15083333	male	178	64.3	Higher s	73.5	medium 2	1	healthy	35655664	.30399733	-.7446181	-.51479611	-.05477719	-19316481
14916667	male	175	62.7	Higher e	73	medium 2	1	healthy	-.31469812	-.75536265	.06939815	-.3643851	-.43074818	.06898949
15083333	male	177.5	50.7	Lower ed	65	medium 2	1	healthy	.42043555	-.65691326	-.76363605	-.2246872	-.89850748	-.4463748
14916667	male	170	73.3	Higher e	78	higher >	1	healthy	.4853213	-115098	-11491965	-.37070228	-.58363625	18242824
15416667	male	177.5	73.1	Higher s	74	low <2 h	1	healthy	-.61999624	-10716363	-14014024	.15928514	-.10691965	-.93707146
15.75	male	165.4	45.7	Lower se	62	low <2 h	1	healthy	-11918828	-19008073	-.33268462	-.73451822	-.56402992	-15629533
14833333	female	163.6	50.8	Higher e	62	low <2 h	1										-15448547		.10117953	.51539616
15416667	male	174.4	54.8	Higher s	66.5	low <2 h	1				-.57673253		-.90823642	-.19438323
15583333	male	169.5	54.6	Higher s	67	medium 2	1	at risk	.00496447	.5361258	-11895875	15247709	-.01689803	-10474249
15.75	male	169.5	72.1	Lower se	75	low <2 h	1	healthy	-.52931598	-.50053041	-.96797497	-.33943062	-.80756811	.9354707
15.25	male	166	67.3	Higher s	75.5	low <2 h	1	healthy	.96257458	-13166697	-10008415	52750045	-.91610774	-.3541387
15416667	male	173.2	56.8	Higher s	68	medium 2	1	healthy	-.86835918	-.89918937	-10320049	14513675	10398411	.00816811
15833333	female	156.5	55.2	Higher s	66	medium 2	1	healthy							.5103835	-.85892428	-.71235372	.00864056	.00866245	-.32494083
15916667	male	179.8	60.9	Higher e	69	medium 2	1		-.48397522	-.94441154		.40481548	-.94132204	-.6604402
14833333	female	167	57.3	Higher s	67	medium 2	1	healthy							.83482353	-.75399714	-.53445926	.07537596	.85201142	-.42260552
15.25	female	167	78.9	Lower se	79	higher >	1	healthy							.05157243	-.22114113	.44352366	.09433206	-.61899016	.80369918
14916667	male	184.8	88.5	Lower se	84	medium 2	1	healthy	.73360318	-.31321406	-.20504872	11927507	-10932631	12841923
15833333	male	167.2	49	Lower ed	66	higher >	1	healthy	-.4238151	-10238068	-.74846118	.03043928	.07425967	-.9091299
15666667	male	180.6	70.8	Lower se	73	medium 2					.87274643		-.77185123	.48417291
15.5	male	168.2	51.9	Higher s	65	low <2 h					18354385		-10175676	.66196483
15.25	male	181	63.2	Higher e		higher >					-.50712074		-.04687033	.1184619
15.75	male	185	71.6	Higher e	70	higher >					-.54139139		-1232344	-.00987891
15833333	male	175.3	66.4	Lower se	73	higher >					-.76234787		-.76116352	-.57149274
15.25	male	189.4	61.6	Lower se	66	higher >					18503658		-.239405	-.3541387
15.5	male	165.2	79.7	Higher s	83	higher >					-.94226656		-.71742033	.1218146
15833333	male	186.8	85.2	Higher s	81	low <2 h					11540281		-.97639119	.30636388
15333333	female	156.6	52.7	Higher e	68	medium 2											19508518		-.02390608	.40796828
15583333	male	172	63.3	Higher e	67	higher >					-10333246		-.95134485	-.10213584
15583333	male	187	76.5	Higher s	77	higher >					-10118241		14074255	.37050868
15833333	female	158.5	53	Higher s	64	low <2 h											.18158399		.03806222	-.09038027
15.5	female	155.7	45.3	Lower ed	63	higher >											.48584179		-.29542929	-.38354416
15.25	male	172	89.8	Higher e	91	higher >					.82908731		-.97839837	-.15159558
15166667	female	154.3	53.2	Higher e	68	low <2 h											18707867		-.8853832	.18320784
14333333	female	169.8	56.2	Higher e	67.5	low <2 h											21906236		-13074924	-.39332178
15083333	male	179	61.8	Higher s	71	higher >					17536698		11117224	-.91896176
14583333	male	175.6	67.5	Lower se	73.5	low <2 h					.3664234		.10553146	-.38554543
15083333	male	185.2	76.6	Higher s	79.5	low <2 h					.78762047		-.04062064	-1121499
14333333	male	175.9	60.6	Higher e	70	medium 2					.68681964		-11719411	-.32138882
15083333	male	173	69.6	Higher s	75	low <2 h					-.5010791		-12977222	.02621215
15166667	male	181.6	83.4	Higher e	84	higher >					.15222028		-.88323971	-.40025683
16.5	female	157.3	56.9	Lower ed	67	medium 2											.11937984		-.59405088	.80911464
16083333	female	160	52.3	Higher s	66	medium 2											10000099		-1172576	-.18324058
16833333	male	183.5	71.4	Higher s	77	medium 2					-.58700633		-.10207208	-1234208
15916667	female	163	56.3	Lower se	69	low <2 h											-.40820308		-.79398905	.92120191
16666667	male	179.5	65.1	Lower se	73	medium 2					.81302636		-.56048852	-.24534247
15833333	male	175	81	Lower se	84	medium 2					-.66622979		15893492	10491656
16.25	male	182	82.7	Higher s	80	higher >					10966		-.06456881	.0643535
16166667	male	166.1	65.2		74	medium 2					18541636		-120433	-.58964463
16.5	female	166.3	53.1	Lower se	63	low <2 h											-.91868169		.76155858	-.2077163
16333333	male	175.2	60.2	Lower se	71	medium 2					-.92846445		24321949	-13755167
16.75	male	177.6	68.3	Lower ed	74	medium 2					17907392		-.91927492	-10775775
16	female	164.6	77	Lower ed	75	low <2 h											23920822		-10140113	16982898
16.5	male	180.3	59.1	Higher s	68	higher >					-10892421		-10527847	-11482656
15833333	female	148.7	40.2	Lower se	61	medium 2											.43013501		.19842458	-.7158751
16.25	male	179.2	73.2	Higher s	74	higher >					-.74553626		-10814673	.5371525
16333333	female	171.8	60	Higher s	64												16134176		-.95328376	.975208
16333333	female	161.3	53.7	Higher s	64	higher >											.98500755		-.84367148	.89699928
16583333	male	175.5	64.5	Lower ed	69	higher >					18150808		-.82790068	-13724173
16416667	male	179.5	61.9	Lower se	70	higher >					-.05544929		12974638	.08910841
16666667	male	182	74	Higher s	75	higher >					-.53642206		-.15247344	-.04265356
16666667	male	168	66.4	Higher s	73	medium 2					-.83419202		-.08447093	-.65072027
16416667	male	158.5	53.4	Higher s	69	medium 2					16143935		-12634795	-.24864269
16583333	male	169.7	68.4		77	higher >					18442254		.14957091	11272479
16166667	male	169.7	87.4	Lower ed	94	higher >					13300328		-.94374543	20443865
16.75	male	179.2	95	Lower se	94	higher >					-.70136802		-.2505374	12872891
16666667	male	174.3	67.6	Lower ed	74	low <2 h							11480746	.83566502
16166667	male	177.2	64.1	Lower se	73	medium 2					-.74839439		-12808059	1639151
16416667	male	177.1	82	Higher s	82	medium 2					.67336618		-.62041081	-.85659465
16166667	female	165.2	61.1	Lower se	69	medium 2											.10365655		-.13891855	-.65733693
16083333	female	161	52.9	Lower se	69	medium 2											-.77967485		.4045258	-.18324058
16083333	female	166.5	55.5	Lower se	66	low <2 h											-10084957		18800515	-.18324058
16166667	female	172.7	64.9	Higher s	70	higher >											.23477717		-.90879583	-.03173252
15916667	female	164.8	77	Lower ed	77	low <2 h											.94809742		-11628374	11557718
16166667	female	181	68.5	Lower se	72	medium 2											.22881836		-.49445215	-.03173252
16666667	male	177	86.5	Higher s	84	low <2 h					-.61306367		.32071072	-.71828324
16.75	female	164	94.5	Lower se	101	medium 2											.76671156		-.46822557	29851369
16.75	male	180.1	94	Lower se	96.1						.43597262		-.50839805	.27377484
16333333	male	177.5	76.5	Higher s	78133333						-.79908169		.85719152	29474508
16666667	male	179.5	79.8	Higher s	87066667						-.24076307		.74005955	-.85340918
16416667	male	184.2	80.5	Higher s	83.2						-.11217531		14391089	-10592453
16916667	male	174.1	61.3	Lower se	76733333						.79230817		-.67059979	-.7826675
16583333	male	188.5	105.8	Higher s	10403333						-.69305754		-.1564202	.04631163
16.25	female	160.9	66	Higher s	75												-.47269287		.73711676	-.81866387
16.75	male	169.2	59	Higher s	71866667						-.4126286		13788019	.40891007
16833333	male	177.1	57	Higher s	73166667						.54540386		-11817641
16416667	male	186.7	86.9	Higher s	85566667						18639754		-10510119	-11267955
15.75	male	170.5	52.6	Higher s	65.1	medium 2					.81172881		.63666997	-.41502874
15333333	male	178.1	99.5	Higher s	97233333						15287716		-10650689	-.64559821
15833333	male	171.1	58.2	Lower se		higher >					.35014086		-.65354969	.57647361
15.75	female	152.3	49.5	Lower se	73.6	low <2 h											-14369325		-.53306931	.93089797
15.5	male	171.2	67	Higher s	77466667	low <2 h					-.93488616		-.67211507	.18933338
16916667	female	159.8	87.3	Lower se	90.1	higher >											-11340081		.93698648	-1092908
17083333	female	158.8	59.8	Higher e	70.6	low <2 h											.68053342		-10467545	-17289039
17.25	male	163.1	54.4	Higher s	72366667	low <2 h					-.31399002		.18417123	-22881858
17166667	male	174.5	62		75.2						-1345532		32813981	-.91469579
15.5	male	178.6	57.7	Lower se	70333333	higher >					.1837461		1208053	-15661549
17083333	male	168.7	76.6	Higher e	83733333	low <2 h					.08838992		.1960642	.52614622
14.25	male	174.1	60.9	Lower se	74033333	higher >					-.32849176		-.10564678	-.23248958
14666667	male	166.5	56.6	Higher s	71.3	medium 2					10773714		-.52754598	.47071076
14833333	male	174.5	77.4	Lower se	81.8	higher >					.63105736		-13491936	-.71975382
16666667	female	154.7	57.8	Higher s	76	low <2 h											.27297991		-.43529573	.01716854
14666667	female	148.2	63.3	Higher s	79766667	low <2 h											-.24269642		.5009199	.91599122
14416667	male	157	40.5	Higher e	65266667	higher >					-.17490944		-.23080709	-12879495
14583333	male	170	51	Higher s	67	higher >					-.11494858		-.77215964	.22205654
14333333	male	157.5	59.2	Higher s	85.5	low <2 h					-.07323914		.50421795	-.52392919
16583333	male	169.1	52.6	Lower ed	69	higher >					-.41019506		-.24708423	-.02124689
15583333	male	183.9	84.1	Higher s	87333333	medium 2					-.71297563		.82410411	-.10213584
15666667	female	155.8	61.3	Higher s	74866667	low <2 h											-.9786762		-10186406	-.39333308
[truncated: 1,309 more rows]
